# Supplementary material for: Association of outpatient use of renin–angiotensin–aldosterone system blockers on outcomes of acute respiratory illness during the COVID-19 pandemic: a cohort study
Source: PubMed Central journal article supplement — BMJ Open. 2022 Jul 6;12(7):e060305. doi: 10.1136/bmjopen-2021-060305 (PMC9260198; doi:10.1136/bmjopen-2021-060305), 2022-07-06
Supplement: bmjopen-2021-060305.draft_revisions.pdf [file bmjopen-2021-060305.draft_revisions.pdf]

# BMJ Open

BMJ Open is committed to open peer review. As part of this commitment we make the peer review history of every article we publish publicly available.

When an article is published we post the peer reviewers' comments and the authors' responses online. We also post the versions of the paper that were used during peer review. These are the versions that the peer review comments apply to.

The versions of the paper that follow are the versions that were submitted during the peer review process. They are not the versions of record or the final published versions. They should not be cited or distributed as the published version of this manuscript.

BMJ Open is an open access journal and the full, final, typeset and author-corrected version of record of the manuscript is available on our site with no access controls, subscription charges or pay-per-view fees (<http://bmjopen.bmj.com>).

If you have any questions on BMJ Open's open peer review process please email [info.bmjopen@bmj.com](mailto:info.bmjopen@bmj.com)

# BMJ Open

## Differential effects of outpatient use of ACE inhibitors and angiotensin receptor blockers on outcomes of acute respiratory illness during the COVID-19 pandemic: a cohort study

|                               |                                                                                                                                                                                                                                                                                                                                                                                                                                                                                                                                                                                                                                                                                                                                                                          |
|-------------------------------|--------------------------------------------------------------------------------------------------------------------------------------------------------------------------------------------------------------------------------------------------------------------------------------------------------------------------------------------------------------------------------------------------------------------------------------------------------------------------------------------------------------------------------------------------------------------------------------------------------------------------------------------------------------------------------------------------------------------------------------------------------------------------|
| Journal:                      | <i>BMJ Open</i>                                                                                                                                                                                                                                                                                                                                                                                                                                                                                                                                                                                                                                                                                                                                                          |
| Manuscript ID                 | bmjopen-2021-060305                                                                                                                                                                                                                                                                                                                                                                                                                                                                                                                                                                                                                                                                                                                                                      |
| Article Type:                 | Original research                                                                                                                                                                                                                                                                                                                                                                                                                                                                                                                                                                                                                                                                                                                                                        |
| Date Submitted by the Author: | 20-Dec-2021                                                                                                                                                                                                                                                                                                                                                                                                                                                                                                                                                                                                                                                                                                                                                              |
| Complete List of Authors:     | Jeffery, Molly; Mayo Clinic, Department of Emergency Medicine; Mayo Clinic, Division of Health Care Delivery Research<br>Oliveira J. e Silva, Lucas; Mayo Clinic, Emergency Medicine<br>Bellolio, Fernanda; Mayo Clinic, Emergency Medicine<br>Garovic, Vesna D.; Mayo Clinic, Department of Medicine, Division of Nephrology & Hypertension<br>Dempsey, Timothy; US Air Force; Mayo Clinic, Robert D. and Patricia E. Kern Center for the Science of Health Care Delivery<br>Limper, Andrew; Mayo Clinic, Department of Medicine, Division of Pulmonary and Critical Care Medicine; Mayo Clinic, Robert D. and Patricia E. Kern Center for the Science of Health Care Delivery<br>Cummins, Nathan; Mayo Clinic, Department of Medicine, Division of Infectious Diseases |
| Keywords:                     | COVID-19, INFECTIOUS DISEASES, Hypertension < CARDIOLOGY                                                                                                                                                                                                                                                                                                                                                                                                                                                                                                                                                                                                                                                                                                                 |
|                               |                                                                                                                                                                                                                                                                                                                                                                                                                                                                                                                                                                                                                                                                                                                                                                          |

SCHOLARONE™  
Manuscripts

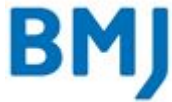

I, the Submitting Author has the right to grant and does grant on behalf of all authors of the Work (as defined in the below author licence), an exclusive licence and/or a non-exclusive licence for contributions from authors who are: i) UK Crown employees; ii) where BMJ has agreed a CC-BY licence shall apply, and/or iii) in accordance with the terms applicable for US Federal Government officers or employees acting as part of their official duties; on a worldwide, perpetual, irrevocable, royalty-free basis to BMJ Publishing Group Ltd ("BMJ") its licensees and where the relevant Journal is co-owned by BMJ to the co-owners of the Journal, to publish the Work in this journal and any other BMJ products and to exploit all rights, as set out in our [licence](#).

The Submitting Author accepts and understands that any supply made under these terms is made by BMJ to the Submitting Author unless you are acting as an employee on behalf of your employer or a postgraduate student of an affiliated institution which is paying any applicable article publishing charge ("APC") for Open Access articles. Where the Submitting Author wishes to make the Work available on an Open Access basis (and intends to pay the relevant APC), the terms of reuse of such Open Access shall be governed by a Creative Commons licence – details of these licences and which [Creative Commons](#) licence will apply to this Work are set out in our licence referred to above.

Other than as permitted in any relevant BMJ Author's Self Archiving Policies, I confirm this Work has not been accepted for publication elsewhere, is not being considered for publication elsewhere and does not duplicate material already published. I confirm all authors consent to publication of this Work and authorise the granting of this licence.

**Title:** Differential effects of outpatient use of ACE inhibitors and angiotensin receptor blockers on outcomes of acute respiratory illness during the COVID-19 pandemic: a cohort study

### Authors

Molly M. Jeffery,<sup>1,2</sup> PhD; Lucas Oliveira J. e Silva,<sup>1</sup> MD, MS; Fernanda Bellolio,<sup>1,2</sup> MD, MS; Vesna D. Garovic<sup>3</sup>, MD, PhD; Timothy M. Dempsey<sup>4,5</sup>, MD; Andrew H. Limper<sup>4,6</sup>, MD; Nathan W. Cummins,<sup>7</sup> MD.

### Authors Affiliations

<sup>1</sup>Department of Emergency Medicine, Mayo Clinic, Rochester, Minnesota, USA.

<sup>2</sup>Division of Health Care Delivery Research, Mayo Clinic, Rochester, Minnesota, USA.

<sup>3</sup>Department of Medicine, Division of Nephrology & Hypertension, Mayo Clinic, Rochester, Minnesota, USA.

<sup>4</sup>Robert D. and Patricia E. Kern Center for the Science of Health Care Delivery, Mayo Clinic, Rochester, Minnesota, USA.

<sup>5</sup>David Grant Medical Center, US Air Force, Travis AFB, CA 94535

<sup>6</sup>Department of Medicine, Division of Pulmonary and Critical Care Medicine, Mayo Clinic, Rochester, MN, USA

<sup>7</sup>Department of Medicine, Division of Infectious Diseases, Mayo Clinic, Rochester, MN, USA.

### Corresponding author

Molly Moore Jeffery, PhD

Assistant Professor of Emergency Medicine and Health Services Research

1  
2  
3 Mayo Clinic Rochester

4  
5 200 First Street SW, Rochester, MN, 55905

6  
7 Email: jeffery.molly@mayo.edu

8  
9  
10 Phone: 507-293-2508

### 11 12 13 14 **Author Contributions**

15  
16 Conceptualization: MMJ, LOJS, FB, VDG, TMD, AHL, NWC. Formal analysis: MMJ.

17  
18 Investigation: MMJ, LOJS, FB, VDG, TMD, AHL, NWC. Methodology: MMJ, LOJS, FB.

19  
20 Project administration: MMJ. Supervision: MMJ, NWC. Validation: MMJ, NWC. Writing-

21  
22 original draft: MMJ. Writing-review and editing: MMJ, LOJS, FB, VSD, TMD, AHL, NWC.

23  
24 Guarantor: MMJ, NWC. All authors provided critical revision and contribution for important

25  
26  
27 intellectual content.

### 28 29 30 31 32 **Funding**

33  
34 This research made possible in part by the Mayo Clinic Robert D. and Patricia E. Kern Center

35  
36 for the Science of Health Care Delivery.

### 37 38 39 40 41 **Competing interests**

42  
43 None.

### 44 45 46 47 48 **Patient consent for publication**

49  
50 Not applicable / Not required.

1  
2  
3 **Word count**  
4

5 3,048 words  
6  
7  
8  
9  
10  
11  
12  
13  
14  
15  
16  
17  
18  
19  
20  
21  
22  
23  
24  
25  
26  
27  
28  
29  
30  
31  
32  
33  
34  
35  
36  
37  
38  
39  
40  
41  
42  
43  
44  
45  
46  
47  
48  
49  
50  
51  
52  
53  
54  
55  
56  
57  
58  
59  
60

For peer review only

## ABSTRACT

**Objectives:** Evaluate the associations between patients taking ACE inhibitors (ACEis) and angiotensin receptor blockers (ARBs) and their clinical outcomes after an acute viral respiratory illness (AVRI) due to COVID-19.

**Design:** Retrospective cohort.

**Setting:** The USA; 2017-2018 influenza season, 2018-2019 influenza season, and 2019-2020 influenza/COVID-19 season.

**Participants:** People with hypertension (HTN) taking an ACEi, ARB or other HTN medications, and experiencing AVRI.

**Main outcome measures:** Change in hospital admission, intensive care unit (ICU) or coronary care unit (CCU), acute respiratory distress (ARD), ARD syndrome (ARDS), and all-cause mortality, comparing COVID-19 to pre-COVID-19 influenza seasons.

**Results:** The cohort included 1,059,474 episodes of AVRI (653,797 filled an ACEi or ARB, and 405,677 other HTN medications). 58.6% were women and 72.9% with age  $\geq 65$ . The ACEi/ARB cohort saw a larger increase in risk in the COVID-19 influenza season than the other HTN medication cohort for four out of five outcomes, with an additional 1.5 percentage point (pp) increase in risk of an inpatient stay (95% CI 1.2 to 1.9 pp) and of ICU/CCU use (95% CI 0.3 to 2.7 pp), as well as a 0.7 pp (0.1 to 1.2 pp) additional increase in risk of ARD and 0.9 pp (0.4 to 1.3 pp) additional increase in risk of ARDS. There was no statistically significant difference in the absolute risk of death (-0.2 pp, 95% CI -0.4 to 0.1 pp). However, the relative risk of death in 2019/2020 vs. 2017/2018 for the ACEi/ARB group was larger (1.40 [1.36 to 1.44]) than for the other HTN medication cohort (1.24 [1.21 to 1.28]).

1  
2  
3 **Conclusions:** People with AVRI using ACEi/ARBs for hypertension had a greater increase in  
4  
5 poor outcomes during the COVID-19 pandemic than those using other medications to treat  
6  
7 hypertension. The small absolute magnitude of the differences likely does not support changes in  
8  
9 clinical practice.  
10  
11

12 Keywords: ACE inhibitors, angiotensin receptor blockers, COVID-19, acute viral respiratory  
13  
14 illness.  
15  
16  
17  
18  
19  
20  
21  
22  
23  
24  
25  
26  
27  
28  
29  
30  
31  
32  
33  
34  
35  
36  
37  
38  
39  
40  
41  
42  
43  
44  
45  
46  
47  
48  
49  
50  
51  
52  
53  
54  
55  
56  
57  
58  
59  
60



## ARTICLE SUMMARY

### Strengths and limitations of this study

- It uses an approach of difference-in-differences that mitigates some of the limitations of observational studies.
- The cohort includes a diverse sample of US residents including people with commercial insurance and Medicare Advantage.
- The cohort is not representative of people without insurance or people with Medicaid or other insurance types.
- Given the observational design, it is not possible to make causal claims.

## INTRODUCTION

The renin-angiotensin-aldosterone system (RAAS) is a hormone system responsible for several physiologic functions including vascular resistance, electrolyte homeostasis, and fluid balance. Medications such as angiotensin-converting enzyme inhibitors (ACEi) and angiotensin-receptor blockers (ARBs) interrupt different steps in this system and are commonly used in clinical practice for outpatient blood pressure or heart failure management. Early in the coronavirus disease 2019 (COVID-19) pandemic, pre-clinical studies raised concerns about the association between use of ACEi or ARBs and severe illness in hypertensive patients with COVID-19.<sup>1</sup> Angiotensin-converting-enzyme 2 (ACE-2) is the binding site for respiratory viruses including the severe acute respiratory syndrome coronavirus 2 (SARS-CoV-2), and two opposing theories on the potential effects of these medications have been debated: one postulating an increased susceptibility to SARS-CoV-2 through upregulation of ACE-2 receptors, and one postulating a protection against severe disease through suppression of angiotensin II and subsequent prevention of virus-mediated acute lung injury.<sup>1</sup>

Since the hypothesis that the prior use of RAAS inhibitors could be associated with worse clinical outcomes in hypertensive patients diagnosed with COVID-19 was raised, several clinical studies were published.<sup>2</sup> In the latest update of a living systematic review addressing this question by Mackey and colleagues, the authors reported high confidence based on 78 studies (77 observational studies, 1 randomized controlled trial [RCTs]) in the finding that ACEi/ARB use is not associated with COVID-19 severity.<sup>2</sup> Another 21 systematic reviews and/or meta-analyses have been consistent with this conclusion as well.<sup>3-23</sup> Furthermore, two recently published RCTs do not support the discontinuation of these drugs in hypertensive patients admitted to the hospital with COVID-19.<sup>24 25</sup>

1  
2  
3 Most existing studies, however, are of relatively small sample size with low  
4  
5 methodological quality. In this study, we aimed to evaluate the associations between patients  
6  
7 taking ACEis and ARBs and their clinical outcomes after an acute viral respiratory illness  
8  
9 (AVRI) due to COVID-19. We assessed severity of illness and mortality in AVRI across cohorts  
10  
11 of patients with hypertension (HTN) using ACEis, ARBs, and other HTN medications, and we  
12  
13 compared the differential effects of these medications on outcomes of AVRI in the 2017/2018  
14  
15 and 2018/2019 influenza seasons to those in the 2019/2020 influenza/COVID-19 season in the  
16  
17 United States.  
18  
19  
20  
21

## 22 **METHODS**

23  
24 We adhered to the RECORD statement (REporting of studies Conducted using  
25  
26 Observational Routinely collected health Data).<sup>26</sup>  
27  
28  
29  
30

### 31 **Data source and study setting**

32  
33 We used de-identified administrative claims data from the OptumLabs Data Warehouse  
34  
35 (OLDW) to identify episodes of AVRI in people with Medicare Advantage or commercial health  
36  
37 insurance in the United States. The OLDW includes medical and pharmacy claims, laboratory  
38  
39 results, and enrollment records for commercial and Medicare Advantage enrollees.<sup>27</sup> The  
40  
41 database contains longitudinal health information on enrollees and patients, representing a  
42  
43 diverse mixture of ages, ethnicities, and geographical regions across the United States.  
44  
45  
46  
47  
48  
49

### 50 **Study design and participants**

51  
52 We created a cohort of patients with one or more episodes of AVRI with an initial date of  
53  
54 service (index date) between October 1, 2017, and November 30, 2020. AVRI was defined  
55  
56  
57  
58  
59

1  
2  
3 using ICD-10 diagnosis codes for viral causes of respiratory illness: bronchitis, pneumonia,  
4  
5 influenza, influenza like illness, and lower respiratory infections. (**Supplementary Material S1**).  
6  
7 Each episode of AVRI started on the first date on which the patient had a claim with an AVRI  
8  
9 diagnosis code and continued until the patient experienced a 30-day span with no AVRI  
10  
11 diagnoses.  
12  
13

14 We required 180 days of continuous insurance enrollment before the index date of the  
15  
16 AVRI episode. Insurance claims during this period were used to identify hypertension  
17  
18 diagnoses, as well as other comorbidities that could be associated with COVID-19 morbidity and  
19  
20 mortality risk or with the choice of medications to treat hypertension, as explained below.  
21  
22  
23  
24  
25

## 26 **Variables and measurements**

27  
28 Patient age, sex, residence state, and insurance enrollments dates and coverage type  
29  
30 (commercial vs. Medicare Advantage) were taken from insurance enrollment data.  
31  
32  
33  
34

### 35 *Hypertension and comorbidities*

36  
37 Hypertension and most comorbidities were defined based on the Quan enhanced  
38  
39 Elixhauser comorbidity ICD-10 codes;<sup>28</sup> codes used to define comorbidities not included in the  
40  
41 Elixhauser index (coronary artery disease, stroke, deep vein thrombosis, and pulmonary  
42  
43 embolism) are available in the **Supplementary Material S1**. Hypertension and diabetes were  
44  
45 coded hierarchically such that people with both complicated and uncomplicated disease were  
46  
47 coded as complicated. All comorbidities required at least one inpatient or two outpatient  
48  
49 diagnoses on different dates of service in the 6 months before the index date. Inpatient and  
50  
51 outpatient settings were defined using procedure and revenue codes using code lists developed  
52  
53  
54  
55  
56  
57  
58  
59  
60

1  
2  
3 for use with Healthcare Effectiveness Data and Information Set (HEDIS) performance  
4  
5 measures.<sup>29</sup>  
6  
7  
8  
9

### 10 *Hypertension medications*

11  
12 We developed a comprehensive list of hypertension medications (see **Supplementary**  
13 **Material S1**), then identified all National Drug Codes (NDCs) for these medications in a table  
14 that is part of the OLDW. We searched for prescription fills in the 90 days before the index date  
15 for each episode of AVRI and categorized fill patterns as ACEi or ARB only, ACEi or ARB with  
16 other (i.e., not ACEi or ARB) hypertension medications, other hypertension medications only, or  
17 no hypertension medications. In primary analyses, ACEi or ARB users with and without other  
18 hypertension medications were combined and compared with people using only other  
19 hypertension medications; information on people who did not use hypertension medications is  
20 provided in summary tables for reference, but they were excluded from the analyses. A small  
21 number of people who filled both an ACEi and an ARB were also excluded from the analysis  
22 (N=10,933).  
23  
24  
25  
26  
27  
28  
29  
30  
31  
32  
33  
34  
35  
36  
37  
38  
39

### 40 **Outcomes**

41  
42 We specified 5 outcomes associated with more serious cases of AVRI: death,  
43 hospitalization, and, conditional on hospitalization: intensive care unit (ICU) or coronary care  
44 unit (CCU) services (revenue codes 0200 to 0219), a diagnosis of acute respiratory distress  
45 (ARD) (ICD-10 diagnosis code R06.03), and a diagnosis of acute respiratory distress syndrome  
46 (ARDS) (ICD-10 diagnosis code J80).  
47  
48  
49  
50  
51  
52  
53  
54  
55  
56  
57  
58  
59  
60

1  
2  
3 Data on death in OLDW includes only the month and year of death to maintain  
4  
5 deidentification. It is sourced from the Death Master File, claims information, and insurance  
6  
7 enrollment information. The mortality outcome in this study assessed whether the person was  
8  
9 reported to have died in the same month as the index date or in the following month.  
10  
11  
12  
13

## 14 15 **Data analysis**

16  
17 We used a difference-in-differences approach to assess the association between use of  
18  
19 ACEis or ARBs and poor outcomes from COVID-19. The comparison group is people with  
20  
21 hypertension using hypertension medications other than ACEis or ARBs; the exposure of interest  
22  
23 is the COVID-19 pandemic. We compared outcomes of AVRI in the 2017/2018 and 2018/2019  
24  
25 influenza seasons to those in the 2019/2020 influenza/COVID-19 season. The premise is that the  
26  
27 design will control for both differences in underlying health between the two medication groups  
28  
29 (by comparing each to people taking those same medications in the years before COVID-19) and  
30  
31 differences in healthcare service use during COVID-19 that are common to all people with  
32  
33 hypertension. The inclusion of two pre-COVID-19 influenza seasons allows for a comparison of  
34  
35 differences in outcomes between the medication groups due to changes in overall AVRI illness  
36  
37 mix unrelated to COVID-19. Cases, inpatient admission rates, and mortality rates can vary  
38  
39 substantially with different influenza strains.<sup>30</sup>  
40  
41  
42  
43

44  
45 We used a linear probability approach to model each of the five outcomes, in 3 time  
46  
47 periods (2017/2018, 2018/2019, and 2019/2020 seasons) for two patient medication groups  
48  
49 (people using ACEis or ARBs vs. those using other HTN medications). Regression models  
50  
51 included patient sex, age (categorical), insurance type (Medicare Advantage vs. commercial),  
52  
53 Census region of residence, race/ethnicity, and flags for comorbidities described above. Huber-  
54  
55  
56  
57  
58  
59  
60

1  
2  
3 White standard errors were specified to adjust for repeated observations of some patients across  
4 separate episodes of AVRI. The model is specified such that the coefficient on the interaction  
5  
6 between the 2019/2020 influenza/COVID-19 season and the ACEi/ARB group provides a  
7  
8 statistical test for whether the ACEi/ARB group was differently affected by COVID-19 than the  
9  
10 other HTN medication cohort. A coefficient greater than 0 indicates the ACEi/ARB group had a  
11  
12 larger absolute increase in risk of the outcome than the other HTN medication cohort.  
13  
14  
15

16  
17 A linear probability model provides estimates of absolute risk differences rather than  
18  
19 relative changes in risk. As a result, the differences are not scaled to the baseline probability of  
20  
21 the event: a one percentage point risk difference may have different importance for an event with  
22  
23 an incidence of 10% (relative increase 10%) compared to one with an incidence of 1% (relative  
24  
25 increase 100%). To ease interpretation of results, we calculated average marginal effects for  
26  
27 each flu season over the medication groups (in other words, the adjusted probabilities were  
28  
29 calculated keeping the actual medication group rather than changing the medication group of  
30  
31 each individual). We calculated ratios of these adjusted probabilities in the 2018/2019 flu season  
32  
33 and the 2019/2020/COVID-19 flu season versus the baseline 2017/2018 flu season, along with p-  
34  
35 values for the hypothesis test that the ratios were equal to 1 (i.e., the baseline year and the later  
36  
37 year had no difference in outcome risk for that medication group). These ratios provide the  
38  
39 percentage relative increase in the outcome risk.  
40  
41  
42  
43  
44  
45  
46

#### 47 *Model result interpretation*

48

49 If the presence of COVID-19 affects the ACEi/ARB group more than the other HTN  
50  
51 medication group, we would expect to see a positive and statistically significant coefficient for  
52  
53 the interaction term ACEi/ARB by season=2019/2020. We would place more credence in the  
54  
55  
56  
57  
58  
59

1  
2  
3 COVID-19 season findings if we find that outcomes in the 2018/2019 season did not differ much  
4  
5 from those in the 2017/18 season, which would suggest that COVID-19 is fundamentally  
6  
7 different from the general year-to-year shifts in flu strain. This would be supported by finding 1)  
8  
9 a smaller coefficient for season=2018/2019 than for season=2019/2020, and 2) a smaller  
10  
11 coefficient for the interaction term ACEi/ARB by season=2018/2019 than for the interaction  
12  
13 term ACEi/ARB by season=2019/2020. Stata/MP version 16.0 was used for all analyses  
14  
15 (StataCorp College Station, TX, 2019). The first author (MMJ) conducted all analyses and had  
16  
17 access to all study data; all other authors had access to summary data and complete analysis  
18  
19 results. No additional data available.  
20  
21  
22  
23

## 24 25 26 **Patient and public involvement**

27  
28 Patients and/or public were not involved in this study.  
29  
30  
31  
32

## 33 **RESULTS**

34  
35 We identified 1,247,393 episodes of AVRI in the study period among people with  
36  
37 hypertension. Of these, 15.1% (187,919) did not fill a hypertension medication in the 90 days  
38  
39 before the index date and were excluded from further analysis. Of the remaining 1,059,474,  
40  
41 61.7% (653,797) filled at least one ACEi or ARB, and 38.3% (405,677) filled no ACEi or ARBs  
42  
43 (**Table 1**). Most episodes were in female patients (58.6%; n=620,810) and in older patients, with  
44  
45 72.9% of AVRI episodes in people aged 65 and older (n=772,210). The most common  
46  
47 comorbidities were chronic pulmonary diseases (35.2%; n=372,735), cardiac arrhythmias  
48  
49 (27.2%, n=288,478), coronary artery disease (26.3%; n=279,098), diabetes with complications  
50  
51 (25.6%; n=271,700), and congestive heart failure (24.0%; n=254,773).  
52  
53  
54  
55  
56  
57  
58  
59  
60



1  
2  
3 Compared to AVRI episodes in those using other HTN medications, AVRI episodes in  
4 people using ACEi or ARB were more frequently identified in those with Commercial insurance  
5 (vs. Medicare Advantage), uncomplicated diabetes, and Hispanic ethnicity, among other patient  
6 characteristics (**Table 1**). AVRI episodes in people using ACEi/ARB were less likely to be  
7 associated with the oldest age group and with most comorbidities, including complicated  
8 hypertension, congestive heart failure, kidney failure, liver failure, cancer, arrhythmia,  
9 coagulopathy, deep vein thrombosis or pulmonary embolism, stroke, and valvular disease,  
10 among other patient characteristics compared to AVRI episodes in people using other HTN  
11 medications. (**Table 1**)  
12  
13  
14  
15  
16  
17  
18  
19  
20  
21  
22  
23  
24  
25

#### 26 Unadjusted outcome rates

27  
28 Across all study years, 15.8% of AVRI episodes included an inpatient stay (n=167,330),  
29 including 14.0% of episodes in ACEi/ARB users (n=91,660) and 18.7% in other HTN  
30 medication users (n=75,670; **Table 1**). Episode mortality rates were 5.2% overall (n=55,164),  
31 4.0% for ACEi/ARB users (n=26,411), and 7.1% in other HTN medication users (n=28,753).  
32  
33  
34  
35  
36  
37 About half of inpatient stays included ICU or CCU use.  
38  
39  
40  
41

#### 42 Primary analysis

43  
44 **Table 2** presents key model results and marginal effects and ratios for season and  
45 medication cohort effects for all five outcomes. Complete regression results are available in  
46 **Supplementary Material S2**. The ACEi/ARB cohort had a somewhat lower risk of three of the  
47 five outcomes in the baseline 2017-2018 flu season compared to the other HTN medication  
48 cohort, with a 1.9 percentage point (pp) (95% CI -2.2 to -1.6 percentage points) lower risk of an  
49  
50  
51  
52  
53  
54  
55  
56  
57  
58  
59  
60

1  
2  
3 inpatient stay, a 0.9 pp lower risk of death (95% CI -1.1 to -0.8 pp), and a 0.7 pp (95% CI -1.1 to  
4  
5 -0.2 pp) lower risk of an ARD diagnosis conditional on having an inpatient stay. The point  
6  
7 estimates for the risk differences of ICU/CCU use or an ARDS diagnosis in an inpatient stay also  
8  
9 showed a lower risk for the ACEi/ARB cohort, but this difference was not statistically  
10  
11 significant. The COVID-19 flu season was associated with a higher risk of all five outcomes in  
12  
13 both the ACEi/ARB and the other HTN medication cohorts. Risk differences ranged from 1.3 pp  
14  
15 higher risk of an ARD (95% CI: 0.8 to 1.7 pp) or ARDS (95% CI: 0.9 to 1.6 pp) diagnosis in an  
16  
17 inpatient stay to a 3.5 pp (2.6 to 4.4 pp) higher risk of ICU/CCU use in an inpatient stay. (**Table**  
18  
19  
20  
21  
22  
23 **2)**

24 The ACEi/ARB cohort saw a larger risk difference than the other HTN medication cohort  
25  
26 in four out of the five outcomes, with an additional 1.5 pp increase in risk of an inpatient stay  
27  
28 (95% CI 1.2 to 1.9 pp) and of ICU/CCU use in an inpatient stay (95% CI 0.3 to 2.7 pp), as well  
29  
30 as a 0.7 pp (0.1 to 1.2 pp) additional increase in risk of ARD and 0.9 pp (0.4 to 1.3 pp) additional  
31  
32 increase in risk of ARDS. There was no statistically significant difference in the absolute risk of  
33  
34 death (-0.2 pp, 95% CI -0.4 to 0.1 pp) for the ACEi/ARB group beyond that seen by the other  
35  
36 medication group. However, the relative increased risk of death in 2019/2020 vs. 2017/2018 for  
37  
38 the ACEi/ARB group was larger (1.40 [1.36 to 1.44]) than for the other HTN medication cohort  
39  
40 (1.24 [1.21 to 1.28]). In other words, each group experienced roughly the same absolute change  
41  
42 in risk (an increase of about 1.6 pp), but the baseline risk of death for the ACEi/ARB group was  
43  
44 lower, so the relative increase was greater.  
45  
46  
47  
48  
49  
50

## 51 Sensitivity analyses

### 52 *ACEi/ARB monotherapy*

1  
2  
3 When we separated people using only ACEi/ARB from those using ACEi/ARB plus  
4 other HTN medications, results were somewhat different for the two groups. In both the  
5 2018/2019 and 2019/2020 seasons, the monotherapy group had a 3.5 to 4.0 pp higher risk of  
6 ICU/CCU use in an inpatient stay than the polytherapy group. (**Supplementary Material S3**)  
7  
8  
9  
10  
11  
12  
13

#### 14 *People with no comorbidities*

15  
16 The primary effect being studied (ACEi/ARB use during COVID-19) was attenuated  
17 when the cohort was limited to people who did not have any of the comorbidities we identified  
18 (other than hypertension). A large (5.0 pp; 95% CI -0.6 pp to 10.6 pp) increase in the risk of an  
19 inpatient stay with ICU/CCU services was not statistically significant because of the small  
20 sample size (N=7,696 episodes). (**Supplementary Material S3**)  
21  
22  
23  
24  
25  
26  
27  
28  
29  
30

#### 31 *Strict flu season*

32  
33 Limiting the 2017/18 and 2018/19 cohorts to cases of AVRI occurring in the strict flu  
34 season (generally October to May) had minimal effect on the results, which were similar to the  
35 primary analysis. (**Supplementary Material S3**)  
36  
37  
38  
39  
40  
41

## 42 **DISCUSSION**

43  
44 In this large observational study, we found that hypertensive patients with an AVRI who  
45 were taking ACEis or ARBs for management of their HTN had larger risk differences during the  
46 COVID-19 period in the outcomes of inpatient stay, inpatient stay with ICU/CCU, inpatient stay  
47 with ARD, and inpatient stay with ARDS when compared with people on other antihypertensive  
48  
49  
50  
51  
52  
53  
54  
55  
56  
57  
58  
59  
60

1  
2  
3 medications. This suggests that people taking ACEi/ARB were more affected by COVID-19 than  
4  
5 people taking other HTN medications.  
6

7  
8 People with AVRI who were using ACEi/ARB had fewer comorbidities compared to  
9  
10 people taking other medications to control their blood pressure, which might explain their lower  
11  
12 baseline risk of poor outcomes. Prior to the COVID-19 season, among people with hypertension  
13  
14 experiencing an episode of AVRI, those who used ACEi/ARB were less likely to have an  
15  
16 inpatient stay, less likely to experience ARDS and ARD, and less likely to die compared to  
17  
18 people on other antihypertensives at baseline.  
19  
20

21  
22 During the COVID-19 flu season, all patients (ACEi/ARB and other HTN) had higher  
23  
24 risk of all outcomes, compared to prior years. This is consistent with evidence that patients with  
25  
26 hypertension experience worse outcomes from COVID-19.<sup>31-35</sup> The ACEi/ARB group had a  
27  
28 larger increase in poor outcomes from baseline compared to patients taking other HTN  
29  
30 medication, including higher rates of hospitalization, ICU admission, ARD and ARDS. There  
31  
32 was no significant difference in the absolute risk of death for those on ACEi/ARB versus other  
33  
34 medication group.  
35  
36

37  
38 While relative changes in poor AVRI outcomes associated with ACEi/ARB use during  
39  
40 COVID-19 were moderate to large, the absolute differences were relatively small, ranging from  
41  
42 0.7 to 1.9 percentage points. The effects demonstrated in this study may support the theoretical  
43  
44 biological effect of ACEi/ARB in the clinical outcomes of people with COVID-19.  
45  
46 Nevertheless, it is very uncertain whether these effects were mediated through upregulation of  
47  
48 ACE-2 receptors and subsequent susceptibility to SARS-CoV-2, as previously proposed.<sup>1</sup>  
49  
50 Moreover, in translating these findings to clinical practice, the small absolute risk differences  
51  
52 observed here are unlikely to outweigh the clinical benefits of ACEi/ARB therapy for managing  
53  
54  
55  
56  
57  
58  
59  
60

1  
2  
3 hypertension and heart failure. Therapy selection for these diseases should follow existing  
4  
5 clinical guidelines of nephrology, cardiology, and other societies.  
6  
7  
8  
9

## 10 **LIMITATIONS**

11  
12 The use of health insurance claims data limits the findings of this study to the populations  
13  
14 included in the OptumLabs Data Warehouse; in particular, we do not observe outcomes of  
15  
16 people who are uninsured or those who have Medicaid insurance (i.e., people with low incomes  
17  
18 and no employer-based insurance). The study only captures people who received health care for  
19  
20 AVRI, which may be different in important ways during COVID-19 compared to earlier years;  
21  
22 early in the pandemic, many people avoided seeking in-person care, likely to avoid exposure to  
23  
24 COVID-19 or to preserve access to care for others.<sup>36</sup> However, the difference-in-differences  
25  
26 design of the study addresses this problem by comparing changes in outcomes for two similar  
27  
28 populations; as long as people with hypertension who used ACEi/ARB and those who used other  
29  
30 medications changed their care seeking behavior in similar ways, this effect should be  
31  
32 minimized.  
33  
34  
35  
36  
37  
38  
39

## 40 **CONCLUSIONS**

41  
42 People with acute viral respiratory illnesses using ACEi/ARBs to treat hypertension had a  
43  
44 greater increase in poor outcomes during the COVID-19 pandemic than those using other  
45  
46 medications to treat hypertension. This may support the existence of the theoretical biological  
47  
48 effect of ACEi/ARB in increasing susceptibility to COVID-19. Small absolute differences in  
49  
50 risks of hospitalization, ICU use, and diagnosis of ARD or ARDS suggest that this effect likely  
51  
52 does not warrant changes in clinical practice.  
53  
54  
55  
56  
57  
58  
59  
60

## CONTRIBUTORSHIP STATEMENT

Conceptualization: MMJ, LOJS, FB, VDG, TMD, AHL, NWC. Formal analysis: MMJ.

Investigation: MMJ, LOJS, FB, VDG, TMD, AHL, NWC. Methodology: MMJ, LOJS, FB.

Project administration: MMJ. Supervision: MMJ, NWC. Validation: MMJ, NWC. Writing-original draft: MMJ. Writing-review and editing: MMJ, LOJS, FB, VSD, TMD, AHL, NWC.

Guarantor: MMJ, NWC. All authors provided critical revision and contribution for important intellectual content.

## COMPETING INTERESTS

None.

## FUNDING

This research made possible in part by the Mayo Clinic Robert D. and Patricia E. Kern Center for the Science of Health Care Delivery.

## DATA SHARING STATEMENT

No additional data available.

**REFERENCES**

1. Vaduganathan M, Vardeny O, Michel T, et al. Renin-Angiotensin-Aldosterone System Inhibitors in Patients with Covid-19. *N Engl J Med* 2020;382(17):1653-59. doi: 10.1056/NEJMsr2005760 [published Online First: 2020/04/01]
2. Mackey K, King VJ, Gurley S, et al. Risks and Impact of Angiotensin-Converting Enzyme Inhibitors or Angiotensin-Receptor Blockers on SARS-CoV-2 Infection in Adults: A Living Systematic Review. *Ann Intern Med* 2020;173(3):195-203. doi: 10.7326/m20-1515 [published Online First: 2020/05/19]
3. Alamer A, Abraham I. Mortality in COVID-19 patients treated with ACEIs/ARBs: Re-estimated meta-analysis results following the Mehra et al. retraction. *Pharmacol Res* 2020;160:105053. doi: 10.1016/j.phrs.2020.105053 [published Online First: 2020/07/04]
4. Baral R, White M, Vassiliou VS. Effect of Renin-Angiotensin-Aldosterone System Inhibitors in Patients with COVID-19: a Systematic Review and Meta-analysis of 28,872 Patients. *Current Atherosclerosis Reports* 2020 22:10 2020;22(10):1-9. doi: 10.1007/S11883-020-00880-6
5. Barochiner J, Martínez R. Use of inhibitors of the renin-angiotensin system in hypertensive patients and COVID-19 severity: A systematic review and meta-analysis. *Journal of Clinical Pharmacy and Therapeutics* 2020;45(6):1244-52. doi: 10.1111/JCPT.13246
6. Caldeira D, Alves M, Gouveia e Melo R, et al. Angiotensin-converting enzyme inhibitors and angiotensin-receptor blockers and the risk of COVID-19 infection or severe disease: Systematic review and meta-analysis. *IJC Heart & Vasculature* 2020;31:100627-27. doi: 10.1016/J.IJCHA.2020.100627

- 1  
2  
3 7. Chan C-K, Huang Y-S, Liao H-W, et al. Renin-Angiotensin-Aldosterone System Inhibitors  
4  
5 and Risks of Severe Acute Respiratory Syndrome Coronavirus 2 Infection. *Hypertension*  
6  
7 2020;1563-71. doi: 10.1161/HYPERTENSIONAHA.120.15989  
8  
9
- 10 8. Flacco ME, Acuti Martellucci C, Bravi F, et al. Treatment with ACE inhibitors or ARBs and  
11  
12 risk of severe/lethal COVID-19: a meta-analysis. *Heart* 2020 doi: 10.1136/heartjnl-2020-  
13  
14 317336 [published Online First: 2020/07/03]  
15  
16
- 17 9. Greco A, Buccheri S, D'Arrigo P, et al. Outcomes of renin-angiotensin-aldosterone system  
18  
19 blockers in patients with COVID-19: a systematic review and meta-analysis. *European*  
20  
21 *Heart Journal - Cardiovascular Pharmacotherapy* 2020;6(5):335-37. doi:  
22  
23 10.1093/EHJCVP/PVAA074  
24  
25
- 26 10. Grover A, Oberoi M. A systematic review and meta-analysis to evaluate the clinical  
27  
28 outcomes in COVID-19 patients on angiotensin-converting enzyme inhibitors or  
29  
30 angiotensin receptor blockers. *European Heart Journal - Cardiovascular*  
31  
32 *Pharmacotherapy* 2021;7(2):148-57. doi: 10.1093/EHJCVP/PVAA064  
33  
34
- 35 11. Guo X, Zhu Y, Hong Y. Decreased Mortality of COVID-19 With Renin-Angiotensin-  
36  
37 Aldosterone System Inhibitors Therapy in Patients With Hypertension. *Hypertension*  
38  
39 2020;11:E13-E14. doi: 10.1161/HYPERTENSIONAHA.120.15572  
40  
41
- 42 12. Hasan SS, Kow CS, Hadi MA, et al. Mortality and Disease Severity Among COVID-19  
43  
44 Patients Receiving Renin-Angiotensin System Inhibitors: A Systematic Review and  
45  
46 Meta-analysis. *American Journal of Cardiovascular Drugs* 2020 20:6 2020;20(6):571-  
47  
48 90. doi: 10.1007/S40256-020-00439-5  
49  
50
- 51 13. Kurdi A, Abutheraa N, Akil L, et al. A systematic review and meta-analysis of the use of  
52  
53 renin-angiotensin system drugs and COVID-19 clinical outcomes: What is the evidence  
54  
55  
56  
57  
58  
59  
60



- 1  
2  
3 so far? *Pharmacology Research & Perspectives* 2020;8(6):e00666-e66. doi:  
4  
5 10.1002/PRP2.666  
6  
7  
8 14. Liu X, Long C, Xiong Q, et al. Association of angiotensin converting enzyme inhibitors and  
9  
10 angiotensin II receptor blockers with risk of COVID-19, inflammation level, severity, and  
11  
12 death in patients with COVID-19: A rapid systematic review and meta-analysis. *Clinical*  
13  
14 *Cardiology* 2020 doi: 10.1002/CLC.23421  
15  
16  
17 15. Lo KB, Bhargav R, Salacup G, et al. Angiotensin converting enzyme inhibitors and  
18  
19 angiotensin II receptor blockers and outcomes in patients with COVID-19: a systematic  
20  
21 review and meta-analysis. <https://doi.org/10.1080/1477907220201826308>  
22  
23 2020;18(12):919-30. doi: 10.1080/14779072.2020.1826308  
24  
25  
26 16. Patoulas D, Katsimardou A, Stavropoulos K, et al. Renin-Angiotensin System Inhibitors and  
27  
28 COVID-19: a Systematic Review and Meta-Analysis. Evidence for Significant  
29  
30 Geographical Disparities. *Current Hypertension Reports* 2020 22:11 2020;22(11):1-13.  
31  
32 doi: 10.1007/S11906-020-01101-W  
33  
34  
35 17. Pirola CJ, Sookoian S. Estimation of Renin-Angiotensin-Aldosterone-System (RAAS)-  
36  
37 Inhibitor effect on COVID-19 outcome: A Meta-analysis. *Journal of Infection*  
38  
39 2020;81(2):276-81. doi: 10.1016/J.JINF.2020.05.052  
40  
41  
42 18. Pranata R, Permana H, Huang I, et al. The use of renin angiotensin system inhibitor on  
43  
44 mortality in patients with coronavirus disease 2019 (COVID-19): A systematic review  
45  
46 and meta-analysis. *Diabetes & Metabolic Syndrome: Clinical Research & Reviews*  
47  
48 2020;14(5):983-90. doi: 10.1016/J.DSX.2020.06.047  
49  
50  
51 19. Salah HM, Calcaterra G, Mehta JL. Renin-Angiotensin System Blockade and Mortality in  
52  
53 Patients With Hypertension and COVID-19 Infection.  
54  
55  
56  
57  
58  
59  
60

- 1  
2  
3 <https://doi.org/10.1177/1074248420947628> 2020;25(6):503-07. doi:  
4  
5 10.1177/1074248420947628  
6  
7  
8 20. Usman MS, Siddiqi TJ, Khan MS, et al. A Meta-analysis of the Relationship Between Renin-  
9  
10 Angiotensin-Aldosterone System Inhibitors and COVID-19. *American Journal of*  
11  
12 *Cardiology* 2020;130:159-61. doi: 10.1016/J.AMJCARD.2020.05.038  
13  
14  
15 21. Wang Y, Chen B, Li Y, et al. The use of renin–angiotensin–aldosterone system (RAAS)  
16  
17 inhibitors is associated with a lower risk of mortality in hypertensive COVID-19 patients:  
18  
19 A systematic review and meta-analysis. *Journal of Medical Virology* 2021;93(3):1370-  
20  
21 77. doi: 10.1002/JMV.26625  
22  
23  
24 22. Xu J, Teng Y, Shang L, et al. The Effect of Prior Angiotensin-Converting Enzyme Inhibitor  
25  
26 and Angiotensin Receptor Blocker Treatment on Coronavirus Disease 2019 (COVID-19)  
27  
28 Susceptibility and Outcome: A Systematic Review and Meta-analysis. *Clinical Infectious*  
29  
30 *Diseases* 2021;72(11):e901-e13. doi: 10.1093/CID/CIAA1592  
31  
32  
33 23. Zhang X, Yu J, Pan Ly, et al. ACEI/ARB use and risk of infection or severity or mortality of  
34  
35 COVID-19: A systematic review and meta-analysis. *Pharmacological Research*  
36  
37 2020;158:104927-27. doi: 10.1016/J.PHRS.2020.104927  
38  
39  
40 24. Cohen JB, Hanff TC, William P, et al. Continuation versus discontinuation of renin–  
41  
42 angiotensin system inhibitors in patients admitted to hospital with COVID-19: a  
43  
44 prospective, randomised, open-label trial. *The Lancet Respiratory Medicine*  
45  
46 2021;9(3):275-84. doi: 10.1016/S2213-2600(20)30558-0  
47  
48  
49 25. Lopes RD, Macedo AVS, Silva PGMdBE, et al. Effect of Discontinuing vs Continuing  
50  
51 Angiotensin-Converting Enzyme Inhibitors and Angiotensin II Receptor Blockers on  
52  
53  
54  
55  
56  
57  
58  
59  
60

- 1  
2  
3 Days Alive and Out of the Hospital in Patients Admitted With COVID-19: A  
4  
5 Randomized Clinical Trial. *JAMA* 2021;325(3):254-64. doi: 10.1001/JAMA.2020.25864  
6  
7  
8 26. Benchimol EI, Smeeth L, Guttman A, et al. The REporting of studies Conducted using  
9  
10 Observational Routinely-collected health Data (RECORD) statement. *PLoS Med*  
11  
12 2015;12(10):e1001885. doi: 10.1371/journal.pmed.1001885 [published Online First:  
13  
14 2015/10/07]  
15  
16  
17 27. Wallace PJ, Shah ND, Dennen T, et al. Optum Labs: building a novel node in the learning  
18  
19 health care system. *Health Aff (Millwood)* 2014;33(7):1187-94. doi:  
20  
21 10.1377/hlthaff.2014.0038 [published Online First: 2014/07/10]  
22  
23  
24 28. Quan H, Sundararajan V, Halfon P, et al. Coding algorithms for defining comorbidities in  
25  
26 ICD-9-CM and ICD-10 administrative data. *Med Care* 2005;43(11):1130-9. doi:  
27  
28 10.1097/01.mlr.0000182534.19832.83 [published Online First: 2005/10/15]  
29  
30  
31 29. National Committee for Quality Assurance. 2019 Quality Rating System (QRS) HEDIS  
32  
33 Value Set Directory 2019 [Available from: [https://store.ncqa.org/2019-quality-rating-](https://store.ncqa.org/2019-quality-rating-system-qrs-hedis-value-set-directory.html)  
34  
35 [system-qrs-hedis-value-set-directory.html](https://store.ncqa.org/2019-quality-rating-system-qrs-hedis-value-set-directory.html) accessed 9/7/2021].  
36  
37  
38 30. Centers for Disease Control and Prevention. Past Seasons Estimated Influenza Disease  
39  
40 Burden [Available from: <https://www.cdc.gov/flu/about/burden/index.html> accessed  
41  
42 9/7/2021].  
43  
44  
45 31. Killerby ME, Link-Gelles R, Haight SC, et al. Characteristics Associated with  
46  
47 Hospitalization Among Patients with COVID-19 - Metropolitan Atlanta, Georgia, March-  
48  
49 April 2020. *MMWR Morb Mortal Wkly Rep* 2020;69(25):790-94. doi:  
50  
51 10.15585/mmwr.mm6925e1 [published Online First: 20200626]  
52  
53  
54  
55  
56  
57  
58  
59  
60

- 1  
2  
3 32. Sheppard JP, Nicholson BD, Lee J, et al. Association Between Blood Pressure Control and  
4  
5        Coronavirus Disease 2019 Outcomes in 45 418 Symptomatic Patients With  
6  
7        Hypertension: An Observational Cohort Study. *Hypertension* 2021;77(3):846-55. doi:  
8  
9        10.1161/hypertensionaha.120.16472 [published Online First: 20201216]  
10  
11  
12 33. Williamson EJ, Walker AJ, Bhaskaran K, et al. Factors associated with COVID-19-related  
13  
14        death using OpenSAFELY. *Nature* 2020;584(7821):430-36. doi: 10.1038/s41586-020-  
15  
16        2521-4 [published Online First: 20200708]  
17  
18  
19 34. Wu Z, McGoogan JM. Characteristics of and Important Lessons From the Coronavirus  
20  
21        Disease 2019 (COVID-19) Outbreak in China: Summary of a Report of 72 314 Cases  
22  
23        From the Chinese Center for Disease Control and Prevention. *Jama* 2020;323(13):1239-  
24  
25        42. doi: 10.1001/jama.2020.2648  
26  
27  
28 35. Zhou F, Yu T, Du R, et al. Clinical course and risk factors for mortality of adult inpatients  
29  
30        with COVID-19 in Wuhan, China: a retrospective cohort study. *Lancet*  
31  
32        2020;395(10229):1054-62. doi: 10.1016/s0140-6736(20)30566-3 [published Online First:  
33  
34        20200311]  
35  
36  
37 36. Jeffery MM, D'Onofrio G, Paek H, et al. Trends in Emergency Department Visits and  
38  
39        Hospital Admissions in Health Care Systems in 5 States in the First Months of the  
40  
41        COVID-19 Pandemic in the US. *JAMA Intern Med* 2020;180(10):1328-33. doi:  
42  
43        10.1001/jamainternmed.2020.3288  
44  
45  
46  
47  
48  
49  
50  
51  
52  
53  
54  
55  
56  
57  
58  
59  
60

1  
2  
3  
4  
5  
6  
7  
8  
9  
10  
11  
12  
13  
14  
15  
16  
17  
18  
19  
20  
21  
22  
23  
24  
25  
26  
27  
28  
29  
30  
31  
32  
33  
34  
35  
36  
37  
38  
39  
40  
41  
42  
43  
44  
45  
46  
47  
48  
49  
50  
51  
52  
53  
54  
55  
56  
57  
58  
59  
60

**LEGENDS**

**Table 1.** Cohort characteristics.

**Table 2.** Main analysis results from linear probability model; full results in supplementary materials.

For peer review only

**Table 1.** Cohort characteristics.

|                         | Comparison only<br>(not included<br>sample)<br>No HTN meds<br>N (%) | Included Sample                 |                      | Total included<br>sample<br>N (%) |
|-------------------------|---------------------------------------------------------------------|---------------------------------|----------------------|-----------------------------------|
|                         |                                                                     | Other HTN meds<br>only<br>N (%) | ACEi or ARB<br>N (%) |                                   |
| <b>Insurance type</b>   |                                                                     |                                 |                      |                                   |
| Medicare Advantage      | 145,045 (77.2%)                                                     | 348,583 (85.9%)                 | 518,670 (79.3%)      | 867,253 (81.9%)                   |
| Commercial              | 42,874 (22.8%)                                                      | 57,094 (14.1%)                  | 135,127 (20.7%)      | 192,221 (18.1%)                   |
| <b>Female</b>           | 99,755 (53.1%)                                                      | 246,659 (60.8%)                 | 374,151 (57.2%)      | 620,810 (58.6%)                   |
| <b>Age (categories)</b> |                                                                     |                                 |                      |                                   |
| <35                     | 3,922 (2.1%)                                                        | 3,354 (0.8%)                    | 4,537 (0.7%)         | 7,891 (0.7%)                      |
| 35-44                   | 8,337 (4.4%)                                                        | 9,784 (2.4%)                    | 17,780 (2.7%)        | 27,564 (2.6%)                     |
| 45-54                   | 17,704 (9.4%)                                                       | 24,916 (6.1%)                   | 51,926 (7.9%)        | 76,842 (7.3%)                     |
| 55-64                   | 32,637 (17.4%)                                                      | 59,872 (14.8%)                  | 115,095 (17.6%)      | 174,967 (16.5%)                   |
| 65-74                   | 54,862 (29.2%)                                                      | 120,039 (29.6%)                 | 218,160 (33.4%)      | 338,199 (31.9%)                   |
| 75-84                   | 44,330 (23.6%)                                                      | 115,011 (28.4%)                 | 171,276 (26.2%)      | 286,287 (27.0%)                   |
| 85+                     | 26,127 (13.9%)                                                      | 72,701 (17.9%)                  | 75,023 (11.5%)       | 147,724 (13.9%)                   |
| <b>Race/ethnicity</b>   |                                                                     |                                 |                      |                                   |
| White                   | 109,223 (58.1%)                                                     | 238,439 (58.8%)                 | 372,987 (57.0%)      | 611,426 (57.7%)                   |
| Black                   | 28,990 (15.4%)                                                      | 70,774 (17.4%)                  | 103,284 (15.8%)      | 174,058 (16.4%)                   |
| Hispanic                | 20,302 (10.8%)                                                      | 36,478 (9.0%)                   | 82,374 (12.6%)       | 118,852 (11.2%)                   |
| Asian                   | 4,449 (2.4%)                                                        | 8,003 (2.0%)                    | 15,063 (2.3%)        | 23,066 (2.2%)                     |
| Unknown/other           | 24,955 (13.3%)                                                      | 51,983 (12.8%)                  | 80,089 (12.2%)       | 132,072 (12.5%)                   |
| <b>Census Division</b>  |                                                                     |                                 |                      |                                   |
| New England             | 7,217 (3.8%)                                                        | 18,358 (4.5%)                   | 25,557 (3.9%)        | 43,915 (4.1%)                     |
| Mid Atlantic            | 18,655 (9.9%)                                                       | 43,354 (10.7%)                  | 59,385 (9.1%)        | 102,739 (9.7%)                    |
| South Atlantic          | 66,206 (35.2%)                                                      | 154,483 (38.1%)                 | 252,798 (38.7%)      | 407,281 (38.4%)                   |
| E North Central         | 24,489 (13.0%)                                                      | 59,277 (14.6%)                  | 86,110 (13.2%)       | 145,387 (13.7%)                   |
| E South Central         | 12,743 (6.8%)                                                       | 28,786 (7.1%)                   | 47,182 (7.2%)        | 75,968 (7.2%)                     |
| W North Central         | 18,292 (9.7%)                                                       | 28,065 (6.9%)                   | 42,997 (6.6%)        | 71,062 (6.7%)                     |
| W South Central         | 25,743 (13.7%)                                                      | 48,406 (11.9%)                  | 92,517 (14.2%)       | 140,923 (13.3%)                   |
| Mountain                | 8,484 (4.5%)                                                        | 14,224 (3.5%)                   | 27,963 (4.3%)        | 42,187 (4.0%)                     |
| Pacific                 | 5,902 (3.1%)                                                        | 10,612 (2.6%)                   | 19,087 (2.9%)        | 29,699 (2.8%)                     |
| Unknown/Other           | 188 (0.1%)                                                          | 112 (0.0%)                      | 201 (0.0%)           | 313 (<0.1%)                       |
| <b>Hypertension</b>     |                                                                     |                                 |                      |                                   |

1  
2  
3  
4  
5  
6  
7  
8  
9  
10  
11  
12  
13  
14  
15  
16  
17  
18  
19  
20  
21  
22  
23  
24  
25  
26  
27  
28  
29  
30  
31  
32  
33  
34  
35  
36  
37  
38  
39  
40  
41  
42  
43  
44  
45  
46  
47  
48  
49  
50  
51  
52  
53  
54  
55  
56  
57  
58  
59  
60

|                                                                | Comparison only<br>(not included<br>sample) | Included Sample        |                  |                          |
|----------------------------------------------------------------|---------------------------------------------|------------------------|------------------|--------------------------|
|                                                                | No HTN meds                                 | Other HTN meds<br>only | ACEi or ARB      | Total included<br>sample |
|                                                                | N (%)                                       | N (%)                  | N (%)            | N (%)                    |
| No complications                                               | 164,325 (87.4%)                             | 334,180 (82.4%)        | 572,570 (87.6%)  | 906,750 (85.6%)          |
| With complications                                             | 23,594 (12.6%)                              | 71,497 (17.6%)         | 81,227 (12.4%)   | 152,724 (14.4%)          |
| <b>Comorbidities</b>                                           |                                             |                        |                  |                          |
| Diabetes                                                       |                                             |                        |                  |                          |
| No complications                                               | 22,002 (11.7%)                              | 42,302 (10.4%)         | 99,778 (15.3%)   | 142,080 (13.4%)          |
| With complications                                             | 37,742 (20.1%)                              | 99,365 (24.5%)         | 172,335 (26.4%)  | 271,700 (25.6%)          |
| Chronic pulmonary disease                                      | 66,355 (35.3%)                              | 163,682 (40.3%)        | 209,053 (32.0%)  | 372,735 (35.2%)          |
| Coronary artery disease                                        | 41,083 (21.9%)                              | 122,633 (30.2%)        | 156,465 (23.9%)  | 279,098 (26.3%)          |
| Congestive heart failure                                       | 30,910 (16.4%)                              | 123,355 (30.4%)        | 131,418 (20.1%)  | 254,773 (24.0%)          |
| Cardia arrhythmia                                              | 47,176 (25.1%)                              | 138,713 (34.2%)        | 149,765 (22.9%)  | 288,478 (27.2%)          |
| Valvular disease                                               | 15,929 (8.5%)                               | 50,011 (12.3%)         | 55,342 (8.5%)    | 105,353 (9.9%)           |
| Chronic/acute deep vein<br>thrombosis or pulmonary<br>embolism | 6,657 (3.5%)                                | 13,846 (3.4%)          | 13,883 (2.1%)    | 27,729 (2.6%)            |
| Peripheral vascular disorders                                  | 24,473 (13.0%)                              | 66,643 (16.4%)         | 74,909 (11.5%)   | 141,552 (13.4%)          |
| Hemorrhagic or ischemic stroke                                 | 15,912 (8.5%)                               | 34,297 (8.5%)          | 39,064 (6.0%)    | 73,361 (6.9%)            |
| Coagulopathy                                                   | 10,197 (5.4%)                               | 25,467 (6.3%)          | 22,109 (3.4%)    | 47,576 (4.5%)            |
| Lymphoma                                                       | 2,928 (1.6%)                                | 6,095 (1.5%)           | 6,086 (.9%)      | 12,181 (1.1%)            |
| Metastatic cancer                                              | 6,506 (3.5%)                                | 11,323 (2.8%)          | 11,808 (1.8%)    | 23,131 (2.2%)            |
| Solid tumor without mets                                       | 17,654 (9.4%)                               | 35,097 (8.7%)          | 42,177 (6.5%)    | 77,274 (7.3%)            |
| Renal failure                                                  | 29,431 (15.7%)                              | 104,877 (25.9%)        | 107,485 (16.4%)  | 212,362 (20.0%)          |
| Liver failure                                                  | 8,676 (4.6%)                                | 19,071 (4.7%)          | 19,875 (3.0%)    | 38,946 (3.7%)            |
| Rheumatoid arthritis/collagen<br>vascular diseases             | 8,584 (4.6%)                                | 20,953 (5.2%)          | 27,768 (4.2%)    | 48,721 (4.6%)            |
| Obesity                                                        | 17,709 (9.4%)                               | 44,279 (10.9%)         | 72,278 (11.1%)   | 116,557 (11.0%)          |
| <b>Total</b>                                                   | 187,919 (100.0%)                            | 405,677 (100.0%)       | 653,797 (100.0%) | 1,059,474 (100.0%)       |
| <b>Unadjusted outcome incidence</b>                            |                                             |                        |                  |                          |
| Inpatient stay                                                 | 33,058 (17.6%)                              | 75,670 (18.7%)         | 91,660 (14.0%)   | 167,330 (15.8%)          |
| ICU/CCU services during<br>inpatient stay                      | 15,360 (46.5%)                              | 37,894 (50.1%)         | 45,129 (49.2%)   | 83,023 (49.6%)           |
| ARDS diagnosis during<br>inpatient stay                        | 1,051 (3.2%)                                | 2,598 (3.4%)           | 3,403 (3.7%)     | 6,001 (3.6%)             |
| ARD diagnosis during<br>inpatient stay                         | 1,781 (5.4%)                                | 4,749 (6.3%)           | 5,388 (5.9%)     | 10,137 (6.1%)            |
| Died same or following calendar<br>month                       | 12,933 (6.9%)                               | 28,753 (7.1%)          | 26,411 (4.0%)    | 55,164 (5.2%)            |

**Table 2.** Main analysis results from linear probability model; full results in supplementary materials.

|                                                            | (1)                          | (2)                         | (3)                         | (4)                          | (5)                          |
|------------------------------------------------------------|------------------------------|-----------------------------|-----------------------------|------------------------------|------------------------------|
|                                                            | Inpatient stay               | Inpatient stay with ICU/CCU | Inpatient stay with ARD dx  | Inpatient stay with ARDS dx  | Died same or following month |
| <b>Key coefficient estimates (95% confidence interval)</b> |                              |                             |                             |                              |                              |
| <b>Season</b>                                              |                              |                             |                             |                              |                              |
| 2017-2018 flu season                                       | ref.                         | ref.                        | ref.                        | ref.                         | ref.                         |
| 2018-2019 flu season                                       | -0.001<br>(-0.004,0.002)     | 0.008<br>(-0.002,0.018)     | 0.013***<br>(0.008,0.017)   | -0.007***<br>(-0.010,-0.004) | 0.000<br>(-0.002,0.002)      |
| 2019-2020 flu season                                       | 0.018***<br>(0.015,0.021)    | 0.035***<br>(0.026,0.044)   | 0.013***<br>(0.008,0.017)   | 0.013***<br>(0.009,0.016)    | 0.016***<br>(0.014,0.017)    |
| <b>HTN medication group</b>                                |                              |                             |                             |                              |                              |
| Other medications only                                     | ref.                         | ref.                        | ref.                        | ref.                         | ref.                         |
| ACEi or ARB plus/minus other medications                   | -0.019***<br>(-0.022,-0.016) | -0.009<br>(-0.019,0.001)    | -0.007**<br>(-0.011,-0.002) | -0.003<br>(-0.007,0.000)     | -0.009***<br>(-0.011,-0.008) |
| <b>Season/medication interactions</b>                      |                              |                             |                             |                              |                              |
| 2018-2019 season: ACEi or ARB plus/minus other medications | 0.004*<br>(0.001,0.008)      | 0.010<br>(-0.004,0.023)     | 0.004<br>(-0.003,0.010)     | 0.000<br>(-0.004,0.004)      | 0.000<br>(-0.002,0.002)      |
| 2019-2020 season: ACEi or ARB plus/minus other medications | 0.015***<br>(0.012,0.019)    | 0.015*<br>(0.003,0.027)     | 0.007*<br>(0.001,0.012)     | 0.009***<br>(0.004,0.013)    | -0.002<br>(-0.004,0.001)     |

Note: p-value for coefficients is for the null hypothesis that the coefficient = 0; presented in probability units (e.g., coefficient of -0.001 represents -0.1 percentage points)

**Marginal effects/predicted probability (95% confidence interval)**

**Other hypertension medications only**

|         |                        |                        |                        |                        |                        |
|---------|------------------------|------------------------|------------------------|------------------------|------------------------|
| 2017/18 | 0.179<br>(0.177,0.181) | 0.482<br>(0.474,0.489) | 0.053<br>(0.050,0.056) | 0.030<br>(0.028,0.033) | 0.064<br>(0.062,0.065) |
| 2018/19 | 0.178<br>(0.176,0.180) | 0.490<br>(0.483,0.496) | 0.066<br>(0.062,0.069) | 0.023<br>(0.021,0.025) | 0.064<br>(0.063,0.065) |
| 2019/20 | 0.196                  | 0.516                  | 0.066                  | 0.043                  | 0.080                  |



|                                                             | (1)                             | (2)                                             | (3)                                            | (4)                                             | (5)                                                 |
|-------------------------------------------------------------|---------------------------------|-------------------------------------------------|------------------------------------------------|-------------------------------------------------|-----------------------------------------------------|
|                                                             | Inpatient stay<br>(0.195,0.198) | Inpatient stay<br>with ICU/CCU<br>(0.511,0.521) | Inpatient stay<br>with ARD dx<br>(0.063,0.068) | Inpatient stay<br>with ARDS dx<br>(0.041,0.045) | Died same or<br>following<br>month<br>(0.078,0.081) |
| <b>ACEi or ARB<br/>plus/minus other<br/>medications</b>     |                                 |                                                 |                                                |                                                 |                                                     |
| 2017/18                                                     | 0.125<br>(0.124,0.127)          | 0.463<br>(0.456,0.470)                          | 0.045<br>(0.042,0.048)                         | 0.029<br>(0.027,0.031)                          | 0.035<br>(0.034,0.035)                              |
| 2018/19                                                     | 0.128<br>(0.127,0.130)          | 0.481<br>(0.475,0.487)                          | 0.061<br>(0.058,0.064)                         | 0.021<br>(0.020,0.023)                          | 0.034<br>(0.034,0.035)                              |
| 2019/20                                                     | 0.158<br>(0.157,0.160)          | 0.512<br>(0.508,0.517)                          | 0.064<br>(0.062,0.066)                         | 0.050<br>(0.048,0.052)                          | 0.049<br>(0.048,0.049)                              |
| <b>Ratios of marginal effects (95% confidence interval)</b> |                                 |                                                 |                                                |                                                 |                                                     |
| <b>Other hypertension<br/>medications only</b>              |                                 |                                                 |                                                |                                                 |                                                     |
| 2018/19 season vs.<br>2017/18                               | 0.994<br>(0.977,1.011)          | 1.017<br>(0.996,1.038)                          | 1.236***<br>(1.136,1.337)                      | 0.759***<br>(0.668,0.850)                       | 0.999<br>(0.969,1.030)                              |
| 2019/20 season vs.<br>2017/18                               | 1.099***<br>(1.081,1.116)       | 1.072***<br>(1.053,1.092)                       | 1.238***<br>(1.147,1.330)                      | 1.414***<br>(1.278,1.550)                       | 1.244***<br>(1.210,1.278)                           |
| <b>ACEi or ARB<br/>plus/minus other<br/>medications</b>     |                                 |                                                 |                                                |                                                 |                                                     |
| 2018/19 season vs.<br>2017/18                               | 1.025**<br>(1.009,1.042)        | 1.039***<br>(1.019,1.058)                       | 1.360***<br>(1.251,1.469)                      | 0.739***<br>(0.656,0.822)                       | 0.993<br>(0.961,1.025)                              |
| 2019/20 season vs.<br>2017/18                               | 1.264***<br>(1.245,1.282)       | 1.107***<br>(1.088,1.126)                       | 1.437***<br>(1.332,1.542)                      | 1.731***<br>(1.580,1.882)                       | 1.404***<br>(1.363,1.444)                           |

Note: p-value for risk ratios is for the null hypothesis that the risk ratio = 1

\* p<0.05, \*\* p<0.01, \*\*\* p<0.001  
ref.: reference category

1  
2  
3 **SUPPLEMENTARY MATERIAL S1**  
4

5 SUPPLEMENT T1: Codes used to define AVRI, CAD, stroke, DVT, and PE  
6

7

| Condition                                              | Codes                                                                                                                                                                                    |
|--------------------------------------------------------|------------------------------------------------------------------------------------------------------------------------------------------------------------------------------------------|
| Acute viral respiratory illness (AVRI)                 | B9721, B9729, J09*, J10*, J11*, J12*, J16, J168, J18, J180, J181, J182, J188, J189, J20, J201, J203, J204, J205, J206, J207, J208, J209, J22, J40, J440, J470, J8411, J84111, U071, U072 |
| Coronary artery disease (CAD)                          | I20*, I21*, I22*, I23*, I24*, I25*                                                                                                                                                       |
| Stroke                                                 | I63*, Z8673*, I60*, I61*, I62*                                                                                                                                                           |
| Deep vein thrombosis (DVT) and pulmonary embolism (PE) | I8249, I824Y, I824Z, I8251, I8259, I825Y, I825Z, I8262, I8272, I26*, I2782                                                                                                               |

8  
9  
10  
11  
12  
13  
14  
15  
16  
17  
18

19  
20  
21 SUPPLEMENT T2: Hypertension medications

22

| Medication type                                               | Included medications (generic name)                                                                                                                                                                                                                                                                                                                                                                                                                                                                                                                   |
|---------------------------------------------------------------|-------------------------------------------------------------------------------------------------------------------------------------------------------------------------------------------------------------------------------------------------------------------------------------------------------------------------------------------------------------------------------------------------------------------------------------------------------------------------------------------------------------------------------------------------------|
| ACEi                                                          | captopril, lisinopril, enalapril, benazepril, perindopril, quinapril, fosinopril, moexipril, ramipril, trandolapril                                                                                                                                                                                                                                                                                                                                                                                                                                   |
| ARB                                                           | losartan, valsartan, irbesartan, candesartan, eprosartan, telmisartan, azilsartan, Olmesartan                                                                                                                                                                                                                                                                                                                                                                                                                                                         |
| Other (excluding topical, ophthalmic, and drops preparations) | Bendroflumethiazide, chlorothiazide, indapamide, metolazone, bumetanide, furosemide, torsemide, ethacrynic, amiloride, triamterene, eplerenone, spironolactone, aliskiren, diltiazem, verapamil, amlodipine, nifedipine, felodipine, nifedipine, torsemide, ethacrynic, isradipine, nisoldipine, doxazosin, prazosin, terazosin, clonidine, guanfacine, methyldopa, reserpine, hydralazine, minoxidil, acebutolol, atenolol, betaxolol, bisoprolol, carvedilol, labetalol, metoprolol, nadolol, nebivolol, penbutolol, pindolol, propranolol, timolol |

23  
24  
25  
26  
27  
28  
29  
30  
31  
32  
33  
34  
35  
36  
37  
38  
39  
40  
41  
42  
43  
44  
45  
46  
47  
48  
49  
50  
51  
52  
53  
54  
55  
56  
57  
58  
59  
60

|    |                                           | Primary analysis                            |                                                          |                                                         |                                                          |                                                           |
|----|-------------------------------------------|---------------------------------------------|----------------------------------------------------------|---------------------------------------------------------|----------------------------------------------------------|-----------------------------------------------------------|
|    |                                           | (1)                                         | (2)                                                      | (3)                                                     | (4)                                                      | (5)                                                       |
|    |                                           | Inpatient stay<br>(95% confidence interval) | Inpatient stay with ICU/CCU<br>(95% confidence interval) | Inpatient stay with ARD dx<br>(95% confidence interval) | Inpatient stay with ARDS dx<br>(95% confidence interval) | Died same or following month<br>(95% confidence interval) |
| 1  |                                           |                                             |                                                          |                                                         |                                                          |                                                           |
| 2  |                                           |                                             |                                                          |                                                         |                                                          |                                                           |
| 3  |                                           |                                             |                                                          |                                                         |                                                          |                                                           |
| 4  | Flu season / medication type              |                                             |                                                          |                                                         |                                                          |                                                           |
| 5  | 2017-2018 flu season                      | ref.                                        | ref.                                                     | ref.                                                    | ref.                                                     | ref.                                                      |
| 6  |                                           |                                             |                                                          |                                                         |                                                          |                                                           |
| 7  | 2018-2019 flu season                      | -0.001<br>(-0.004,0.002)                    | 0.008<br>(-0.002,0.018)                                  | 0.013***<br>(0.008,0.017)                               | -0.007***<br>(-0.010,-0.004)                             | 0.000<br>(-0.002,0.002)                                   |
| 8  | 2019-2020 flu season                      | 0.018***<br>(0.015,0.021)                   | 0.035***<br>(0.026,0.044)                                | 0.013***<br>(0.008,0.017)                               | 0.013***<br>(0.009,0.016)                                | 0.016***<br>(0.014,0.017)                                 |
| 9  | Other medications only                    | ref.                                        | ref.                                                     | ref.                                                    | ref.                                                     | ref.                                                      |
| 10 |                                           |                                             |                                                          |                                                         |                                                          |                                                           |
| 11 | ACEi or ARB plus/minus other medications  | -0.019***<br>(-0.022,-0.016)                | -0.009<br>(-0.019,0.001)                                 | -0.007**<br>(-0.011,-0.002)                             | -0.003<br>(-0.007,0.000)                                 | -0.009***<br>(-0.011,-0.008)                              |
| 12 | ACEi or ARB monotherapy                   |                                             |                                                          |                                                         |                                                          |                                                           |
| 13 |                                           |                                             |                                                          |                                                         |                                                          |                                                           |
| 14 | 2018-2019 season: ACEi or ARB +/- other   | 0.004*<br>(0.001,0.008)                     | 0.01<br>(-0.004,0.023)                                   | 0.004<br>(-0.003,0.010)                                 | 0<br>(-0.004,0.004)                                      | 0<br>(-0.002,0.002)                                       |
| 15 | 2018-2019 season: ACEi or ARB monotherapy |                                             |                                                          |                                                         |                                                          |                                                           |
| 16 |                                           |                                             |                                                          |                                                         |                                                          |                                                           |
| 17 | 2019-2020 season: ACEi or ARB +/- other   | 0.015***<br>(0.012,0.019)                   | 0.015*<br>(0.003,0.027)                                  | 0.007*<br>(0.001,0.012)                                 | 0.009***<br>(0.004,0.013)                                | -0.002<br>(-0.004,0.001)                                  |
| 18 | 2019-2020 season: ACEi or ARB monotherapy |                                             |                                                          |                                                         |                                                          |                                                           |
| 19 |                                           |                                             |                                                          |                                                         |                                                          |                                                           |
| 20 | Demographics                              |                                             |                                                          |                                                         |                                                          |                                                           |
| 21 | Female                                    | -0.016***<br>(-0.017,-0.014)                | -0.023***<br>(-0.028,-0.018)                             | 0<br>(-0.002,0.003)                                     | -0.004***<br>(-0.006,-0.002)                             | -0.011***<br>(-0.012,-0.010)                              |
| 22 | Age categories                            |                                             |                                                          |                                                         |                                                          |                                                           |
| 23 | <35                                       | -0.006*<br>(-0.011,-0.000)                  | -0.029<br>(-0.078,0.019)                                 | 0.02<br>(-0.006,0.045)                                  | -0.01<br>(-0.028,0.008)                                  | -0.001<br>(-0.003,0.001)                                  |
| 24 | 35-44                                     | -0.008***<br>(-0.012,-0.005)                | -0.028<br>(-0.056,0.000)                                 | 0.006<br>(-0.008,0.019)                                 | -0.004<br>(-0.016,0.008)                                 | 0.001<br>(-0.000,0.002)                                   |
| 25 | 45-54                                     | ref.                                        | ref.                                                     | ref.                                                    | ref.                                                     | ref.                                                      |
| 26 |                                           |                                             |                                                          |                                                         |                                                          |                                                           |
| 27 | 55-64                                     | 0.010***<br>(0.008,0.013)                   | 0.005<br>(-0.009,0.020)                                  | 0.001<br>(-0.005,0.008)                                 | 0.001<br>(-0.005,0.007)                                  | 0.001*<br>(0.000,0.002)                                   |
| 28 | 65-74                                     | 0.011***<br>(0.008,0.014)                   | -0.003<br>(-0.017,0.011)                                 | 0.001<br>(-0.006,0.008)                                 | -0.001<br>(-0.007,0.004)                                 | 0.009***<br>(0.007,0.010)                                 |
| 29 | 75-84                                     | 0.029***<br>(0.025,0.032)                   | -0.026***<br>(-0.041,-0.012)                             | -0.002<br>(-0.009,0.004)                                | -0.005<br>(-0.011,0.001)                                 | 0.024***<br>(0.023,0.026)                                 |
| 30 | 85+                                       | 0.045***<br>(0.041,0.048)                   | -0.071***<br>(-0.086,-0.056)                             | -0.010**<br>(-0.017,-0.003)                             | -0.014***<br>(-0.020,-0.008)                             | 0.063***<br>(0.061,0.065)                                 |
| 31 | Insurance coverage type                   |                                             |                                                          |                                                         |                                                          |                                                           |
| 32 | Medicare Advantage                        | ref.                                        | ref.                                                     | ref.                                                    | ref.                                                     | ref.                                                      |
| 33 |                                           |                                             |                                                          |                                                         |                                                          |                                                           |
| 34 | Commercial                                | -0.032***<br>(-0.034,-0.030)                | 0.01<br>(-0.001,0.020)                                   | 0.001<br>(-0.004,0.006)                                 | 0.003<br>(-0.002,0.007)                                  | -0.001*<br>(-0.002,-0.000)                                |
| 35 | Census region                             |                                             |                                                          |                                                         |                                                          |                                                           |
| 36 | Unknown/other                             | -0.046**<br>(-0.075,-0.016)                 | 0.194*<br>(0.014,0.373)                                  | -0.011<br>(-0.086,0.064)                                | 0.009<br>(-0.068,0.087)                                  | -0.023*<br>(-0.044,-0.002)                                |
| 37 | New England                               | ref.                                        | ref.                                                     | ref.                                                    | ref.                                                     | ref.                                                      |
| 38 |                                           |                                             |                                                          |                                                         |                                                          |                                                           |
| 39 | Mid Atlantic                              | -0.008***<br>(-0.012,-0.003)                | 0.017*<br>(0.003,0.031)                                  | 0.021***<br>(0.015,0.028)                               | 0.021***<br>(0.016,0.026)                                | -0.005**<br>(-0.008,-0.002)                               |
| 40 | South Atlantic                            | -0.001<br>(-0.005,0.003)                    | 0.122***<br>(0.110,0.134)                                | 0.016***<br>(0.011,0.021)                               | 0.003<br>(-0.002,0.007)                                  | -0.016***<br>(-0.018,-0.013)                              |
| 41 |                                           |                                             |                                                          |                                                         |                                                          |                                                           |
| 42 |                                           |                                             |                                                          |                                                         |                                                          |                                                           |
| 43 |                                           |                                             |                                                          |                                                         |                                                          |                                                           |
| 44 |                                           |                                             |                                                          |                                                         |                                                          |                                                           |
| 45 |                                           |                                             |                                                          |                                                         |                                                          |                                                           |
| 46 |                                           |                                             |                                                          |                                                         |                                                          |                                                           |
| 47 |                                           |                                             |                                                          |                                                         |                                                          |                                                           |

|                               |  | Primary analysis                            |                                                          |                                                         |                                                          |                                                           |
|-------------------------------|--|---------------------------------------------|----------------------------------------------------------|---------------------------------------------------------|----------------------------------------------------------|-----------------------------------------------------------|
|                               |  | (1)                                         | (2)                                                      | (3)                                                     | (4)                                                      | (5)                                                       |
|                               |  | Inpatient stay<br>(95% confidence interval) | Inpatient stay with ICU/CCU<br>(95% confidence interval) | Inpatient stay with ARD dx<br>(95% confidence interval) | Inpatient stay with ARDS dx<br>(95% confidence interval) | Died same or following month<br>(95% confidence interval) |
| E North Central               |  | 0.018***<br>(0.013,0.022)                   | 0.073***<br>(0.060,0.086)                                | 0.003<br>(-0.002,0.009)                                 | 0<br>(-0.004,0.004)                                      | -0.009***<br>(-0.012,-0.007)                              |
| E South Central               |  | 0.011***<br>(0.007,0.016)                   | 0.071***<br>(0.056,0.085)                                | 0.018***<br>(0.011,0.024)                               | -0.001<br>(-0.006,0.005)                                 | -0.009***<br>(-0.011,-0.006)                              |
| W North Central               |  | 0.027***<br>(0.022,0.032)                   | 0.093***<br>(0.079,0.107)                                | 0.004<br>(-0.002,0.010)                                 | 0.006*<br>(0.001,0.011)                                  | -0.007***<br>(-0.010,-0.004)                              |
| W South Central               |  | 0.014***<br>(0.010,0.018)                   | 0.111***<br>(0.097,0.124)                                | 0.017***<br>(0.011,0.023)                               | 0.003<br>(-0.002,0.007)                                  | -0.011***<br>(-0.014,-0.009)                              |
| Mountain                      |  | -0.033***<br>(-0.037,-0.028)                | 0.122***<br>(0.103,0.140)                                | -0.007<br>(-0.015,0.000)                                | 0.008*<br>(0.001,0.016)                                  | -0.019***<br>(-0.022,-0.016)                              |
| Pacific                       |  | -0.002<br>(-0.007,0.004)                    | 0.170***<br>(0.151,0.189)                                | 0.008<br>(-0.000,0.017)                                 | 0.001<br>(-0.006,0.007)                                  | -0.016***<br>(-0.019,-0.013)                              |
| Race/ethnicity                |  | -0.007***<br>(-0.010,-0.005)                | 0.020***<br>(0.013,0.028)                                | 0.004*<br>(0.001,0.008)                                 | 0.009***<br>(0.006,0.012)                                | -0.002**<br>(-0.003,-0.001)                               |
| Unknown/other                 |  | ref.                                        | ref.                                                     | ref.                                                    | ref.                                                     | ref.                                                      |
| White                         |  | 0.011***<br>(0.009,0.013)                   | -0.010**<br>(-0.017,-0.003)                              | 0.005**<br>(0.002,0.008)                                | 0.008***<br>(0.006,0.011)                                | 0.004***<br>(0.002,0.005)                                 |
| Black                         |  | -0.016***<br>(-0.018,-0.013)                | 0.086***<br>(0.077,0.095)                                | 0.011***<br>(0.006,0.015)                               | 0.010***<br>(0.007,0.014)                                | -0.008***<br>(-0.009,-0.006)                              |
| Hispanic                      |  | -0.011***<br>(-0.016,-0.007)                | 0.020*<br>(0.002,0.039)                                  | 0.002<br>(-0.007,0.010)                                 | 0.007<br>(-0.000,0.014)                                  | -0.001<br>(-0.004,0.002)                                  |
| Asian                         |  | ref.                                        | ref.                                                     | ref.                                                    | ref.                                                     | ref.                                                      |
| Comorbidities                 |  | 0.011***<br>(0.009,0.013)                   | 0.012**<br>(0.004,0.019)                                 | 0.005**<br>(0.001,0.009)                                | 0.004**<br>(0.001,0.007)                                 | 0.005***<br>(0.004,0.006)                                 |
| No diabetes                   |  | 0.029***<br>(0.027,0.031)                   | 0.008**<br>(0.002,0.014)                                 | -0.002<br>(-0.005,0.001)                                | 0.002<br>(-0.000,0.004)                                  | 0.008***<br>(0.006,0.009)                                 |
| Diabetes without CC           |  | ref.                                        | ref.                                                     | ref.                                                    | ref.                                                     | ref.                                                      |
| Diabetes with CC              |  | 0.023***<br>(0.020,0.026)                   | -0.012**<br>(-0.018,-0.005)                              | -0.003<br>(-0.006,0.000)                                | -0.003*<br>(-0.005,-0.000)                               | -0.001<br>(-0.003,0.001)                                  |
| Uncomp hypertension           |  | 0.020***<br>(0.018,0.022)                   | 0.028***<br>(0.022,0.033)                                | 0.001<br>(-0.001,0.004)                                 | -0.002<br>(-0.004,0.000)                                 | 0.007***<br>(0.006,0.009)                                 |
| Comp hypertension             |  | 0.093***<br>(0.090,0.095)                   | 0.077***<br>(0.072,0.083)                                | 0.018***<br>(0.015,0.020)                               | 0.002*<br>(0.000,0.004)                                  | 0.036***<br>(0.034,0.037)                                 |
| Coronary artery disease       |  | 0.061***<br>(0.059,0.063)                   | -0.010***<br>(-0.015,-0.005)                             | 0.015***<br>(0.013,0.018)                               | -0.007***<br>(-0.009,-0.006)                             | -0.002***<br>(-0.003,-0.001)                              |
| Congestive heart failure      |  | 0.019***<br>(0.017,0.022)                   | 0.012***<br>(0.005,0.018)                                | -0.001<br>(-0.004,0.003)                                | 0.001<br>(-0.001,0.004)                                  | 0.023***<br>(0.021,0.025)                                 |
| Chronic pulmonary diseases    |  | 0.046***<br>(0.042,0.051)                   | 0.035***<br>(0.025,0.045)                                | -0.003<br>(-0.008,0.002)                                | 0<br>(-0.004,0.004)                                      | 0.059***<br>(0.056,0.063)                                 |
| Renal failure                 |  | 0.122***<br>(0.115,0.130)                   | 0.01<br>(-0.003,0.024)                                   | 0.003<br>(-0.004,0.009)                                 | -0.010***<br>(-0.014,-0.006)                             | 0.136***<br>(0.130,0.142)                                 |
| Liver failure                 |  | 0.064***<br>(0.056,0.073)                   | -0.008<br>(-0.025,0.009)                                 | -0.001<br>(-0.009,0.007)                                | -0.010***<br>(-0.015,-0.004)                             | 0.027***<br>(0.021,0.033)                                 |
| Metastatic cancer             |  | 0.036***<br>(0.033,0.040)                   | 0.018***<br>(0.009,0.027)                                | 0<br>(-0.004,0.005)                                     | -0.003*<br>(-0.006,-0.000)                               | 0.028***<br>(0.026,0.030)                                 |
| Lymphoma                      |  | -0.008***<br>(-0.011,-0.006)                | 0.017***<br>(0.010,0.023)                                | 0.004**<br>(0.001,0.008)                                | 0.001<br>(-0.001,0.003)                                  | 0.018***<br>(0.017,0.020)                                 |
| Non-metastatic solid tumor    |  | 0.062***                                    | 0.062***                                                 | 0.005***                                                | -0.002*                                                  | 0.024***                                                  |
| Peripheral vascular disorders |  |                                             |                                                          |                                                         |                                                          |                                                           |
| Cardiac arrhythmias           |  |                                             |                                                          |                                                         |                                                          |                                                           |

1  
2  
3  
4  
5  
6  
7  
8  
9  
10  
11  
12  
13  
14  
15  
16  
17  
18  
19  
20  
21  
22  
23  
24  
25  
26  
27  
28  
29  
30  
31  
32  
33  
34  
35  
36  
37  
38  
39  
40  
41  
42  
43  
44  
45  
46  
47

|                                                          |  | Primary analysis                            |                                                          |                                                         |                                                          |                                                           |
|----------------------------------------------------------|--|---------------------------------------------|----------------------------------------------------------|---------------------------------------------------------|----------------------------------------------------------|-----------------------------------------------------------|
|                                                          |  | (1)                                         | (2)                                                      | (3)                                                     | (4)                                                      | (5)                                                       |
|                                                          |  | Inpatient stay<br>(95% confidence interval) | Inpatient stay with ICU/CCU<br>(95% confidence interval) | Inpatient stay with ARD dx<br>(95% confidence interval) | Inpatient stay with ARDS dx<br>(95% confidence interval) | Died same or following month<br>(95% confidence interval) |
| Rheumatoid arthritis/collagen vascular diseases          |  | 0.016***<br>(0.013,0.020)                   | -0.005<br>(-0.016,0.005)                                 | -0.007**<br>(-0.012,-0.002)                             | 0<br>(-0.004,0.004)                                      | 0.004***<br>(0.002,0.006)                                 |
| Coagulopathy                                             |  | 0.029***<br>(0.024,0.033)                   | 0.032***<br>(0.023,0.041)                                | -0.004<br>(-0.008,0.000)                                | 0.002<br>(-0.001,0.005)                                  | 0.035***<br>(0.032,0.038)                                 |
| Obesity                                                  |  | -0.002<br>(-0.005,0.000)                    | 0.013***<br>(0.006,0.021)                                | 0.004<br>(-0.000,0.007)                                 | 0.009***<br>(0.006,0.012)                                | -0.009***<br>(-0.010,-0.007)                              |
| Chronic/acute deep vein thrombosis or pulmonary embolism |  | 0.061***<br>(0.056,0.067)                   | 0.050***<br>(0.039,0.061)                                | 0.003<br>(-0.003,0.009)                                 | 0.002<br>(-0.003,0.006)                                  | 0.030***<br>(0.026,0.034)                                 |
| Hemorrhagic or ischemic stroke                           |  | 0.016***<br>(0.013,0.020)                   | 0.032***<br>(0.024,0.040)                                | 0.002<br>(-0.001,0.006)                                 | -0.004**<br>(-0.007,-0.001)                              | 0.043***<br>(0.040,0.045)                                 |
| Valvular disease                                         |  | -0.009***<br>(-0.012,-0.006)                | 0.045***<br>(0.038,0.052)                                | 0.007***<br>(0.003,0.010)                               | -0.002<br>(-0.004,0.001)                                 | 0.017***<br>(0.015,0.019)                                 |
| Constant                                                 |  | 0.058***<br>(0.053,0.063)                   | 0.310***<br>(0.291,0.330)                                | 0.020***<br>(0.011,0.029)                               | 0.034***<br>(0.027,0.041)                                | 0.012***<br>(0.009,0.015)                                 |
| N                                                        |  | 1059474                                     | 167330                                                   | 167330                                                  | 167330                                                   | 1057707                                                   |
| N_clust                                                  |  | 728455                                      | 147846                                                   | 147846                                                  | 147846                                                   | 727311                                                    |
| p                                                        |  | <0.001                                      | <0.001                                                   | <0.001                                                  | <0.001                                                   | <0.001                                                    |
| R-squared                                                |  | 0.081                                       | 0.037                                                    | 0.006                                                   | 0.008                                                    | 0.076                                                     |

For peer review only

Sensitivity analysis: ACEi/ARB monotherapy

|                                           | (6)                          | (7)                          | (8)                         | (9)                          | (10)                         |
|-------------------------------------------|------------------------------|------------------------------|-----------------------------|------------------------------|------------------------------|
|                                           | Inpatient stay               | Inpatient stay with ICU/CCU  | Inpatient stay with ARD dx  | Inpatient stay with ARDS dx  | Died same or following month |
|                                           | (95% confidence interval)    | (95% confidence interval)    | (95% confidence interval)   | (95% confidence interval)    | (95% confidence interval)    |
| Flu season / medication type              |                              |                              |                             |                              |                              |
| 2017-2018 flu season                      | ref.                         | ref.                         | ref.                        | ref.                         | ref.                         |
| 2018-2019 flu season                      | -0.001<br>(-0.004,0.002)     | 0.008<br>(-0.002,0.018)      | 0.013***<br>(0.008,0.017)   | -0.007***<br>(-0.010,-0.004) | 0<br>(-0.002,0.002)          |
| 2019-2020 flu season                      | 0.018***<br>(0.015,0.021)    | 0.035***<br>(0.026,0.044)    | 0.013***<br>(0.008,0.017)   | 0.013***<br>(0.009,0.016)    | 0.016***<br>(0.014,0.017)    |
| Other medications only                    | ref.                         | ref.                         | ref.                        | ref.                         | ref.                         |
| ACEi or ARB plus/minus other medications  | -0.020***<br>(-0.023,-0.017) | -0.004<br>(-0.014,0.006)     | -0.007**<br>(-0.011,-0.002) | -0.002<br>(-0.006,0.001)     | -0.010***<br>(-0.012,-0.009) |
| ACEi or ARB monotherapy                   | -0.016***<br>(-0.020,-0.012) | -0.039***<br>(-0.057,-0.020) | -0.007<br>(-0.015,0.001)    | -0.009**<br>(-0.015,-0.003)  | -0.004***<br>(-0.006,-0.002) |
| 2018-2019 season: ACEi or ARB +/- other   | 0.004*<br>(0.000,0.008)      | 0.004<br>(-0.009,0.018)      | 0.004<br>(-0.003,0.010)     | -0.001<br>(-0.005,0.004)     | -0.001<br>(-0.003,0.002)     |
| 2018-2019 season: ACEi or ARB monotherapy | 0.005<br>(-0.001,0.010)      | 0.040**<br>(0.015,0.065)     | 0.002<br>(-0.009,0.013)     | 0.002<br>(-0.006,0.009)      | 0.001<br>(-0.002,0.004)      |
| 2019-2020 season: ACEi or ARB +/- other   | 0.015***<br>(0.011,0.019)    | 0.011<br>(-0.001,0.024)      | 0.007*<br>(0.002,0.013)     | 0.008***<br>(0.003,0.013)    | -0.001<br>(-0.004,0.001)     |
| 2019-2020 season: ACEi or ARB monotherapy | 0.017***<br>(0.012,0.022)    | 0.035**<br>(0.013,0.057)     | 0.004<br>(-0.006,0.013)     | 0.012**<br>(0.004,0.020)     | -0.003*<br>(-0.006,-0.000)   |
| Demographics                              |                              |                              |                             |                              |                              |
| Female                                    | -0.016***<br>(-0.017,-0.014) | -0.023***<br>(-0.028,-0.018) | 0<br>(-0.002,0.003)         | -0.004***<br>(-0.006,-0.002) | -0.011***<br>(-0.012,-0.010) |
| Age categories                            |                              |                              |                             |                              |                              |
| <35                                       | -0.006*<br>(-0.012,-0.000)   | -0.029<br>(-0.078,0.020)     | 0.02<br>(-0.005,0.045)      | -0.01<br>(-0.028,0.008)      | -0.001<br>(-0.003,0.001)     |
| 35-44                                     | -0.008***<br>(-0.012,-0.005) | -0.028<br>(-0.056,0.000)     | 0.006<br>(-0.008,0.019)     | -0.004<br>(-0.016,0.008)     | 0.001<br>(-0.001,0.002)      |
| 45-54                                     | ref.                         | ref.                         | ref.                        | ref.                         | ref.                         |
| 55-64                                     | 0.010***<br>(0.008,0.013)    | 0.005<br>(-0.009,0.020)      | 0.001<br>(-0.005,0.008)     | 0.001<br>(-0.005,0.007)      | 0.001*<br>(0.000,0.002)      |
| 65-74                                     | 0.011***<br>(0.008,0.014)    | -0.003<br>(-0.017,0.011)     | 0.001<br>(-0.006,0.008)     | -0.001<br>(-0.007,0.004)     | 0.009***<br>(0.007,0.010)    |
| 75-84                                     | 0.029***<br>(0.026,0.032)    | -0.026***<br>(-0.041,-0.012) | -0.002<br>(-0.009,0.004)    | -0.005<br>(-0.011,0.001)     | 0.024***<br>(0.023,0.026)    |
| 85+                                       | 0.045***<br>(0.041,0.049)    | -0.072***<br>(-0.087,-0.057) | -0.010**<br>(-0.017,-0.003) | -0.014***<br>(-0.020,-0.008) | 0.063***<br>(0.061,0.065)    |
| Insurance coverage type                   |                              |                              |                             |                              |                              |
| Medicare Advantage                        | ref.                         | ref.                         | ref.                        | ref.                         | ref.                         |
| Commercial                                | -0.032***<br>(-0.035,-0.030) | 0.01<br>(-0.001,0.021)       | 0.001<br>(-0.004,0.006)     | 0.003<br>(-0.002,0.007)      | -0.001**<br>(-0.002,-0.000)  |
| Census region                             |                              |                              |                             |                              |                              |
| Unknown/other                             | -0.045**<br>(-0.075,-0.016)  | 0.196*<br>(0.016,0.375)      | -0.011<br>(-0.086,0.064)    | 0.009<br>(-0.068,0.087)      | -0.023*<br>(-0.044,-0.002)   |
| New England                               | ref.                         | ref.                         | ref.                        | ref.                         | ref.                         |
| Mid Atlantic                              | -0.008***<br>(-0.012,-0.003) | 0.017*<br>(0.003,0.031)      | 0.021***<br>(0.015,0.028)   | 0.021***<br>(0.016,0.026)    | -0.005**<br>(-0.008,-0.002)  |
| South Atlantic                            | -0.001<br>(-0.005,0.003)     | 0.122***<br>(0.110,0.134)    | 0.016***<br>(0.011,0.021)   | 0.003<br>(-0.002,0.007)      | -0.016***<br>(-0.018,-0.013) |

## Sensitivity analysis: ACEi/ARB monotherapy

|                               | (6)                                         | (7)                                                      | (8)                                                     | (9)                                                      | (10)                                                      |
|-------------------------------|---------------------------------------------|----------------------------------------------------------|---------------------------------------------------------|----------------------------------------------------------|-----------------------------------------------------------|
|                               | Inpatient stay<br>(95% confidence interval) | Inpatient stay with ICU/CCU<br>(95% confidence interval) | Inpatient stay with ARD dx<br>(95% confidence interval) | Inpatient stay with ARDS dx<br>(95% confidence interval) | Died same or following month<br>(95% confidence interval) |
| E North Central               | 0.018***<br>(0.013,0.022)                   | 0.073***<br>(0.060,0.086)                                | 0.003<br>(-0.002,0.009)                                 | 0<br>(-0.004,0.004)                                      | -0.009***<br>(-0.012,-0.007)                              |
| E South Central               | 0.011***<br>(0.007,0.016)                   | 0.070***<br>(0.056,0.085)                                | 0.018***<br>(0.011,0.024)                               | -0.001<br>(-0.006,0.004)                                 | -0.008***<br>(-0.011,-0.006)                              |
| W North Central               | 0.027***<br>(0.022,0.032)                   | 0.093***<br>(0.079,0.107)                                | 0.004<br>(-0.002,0.010)                                 | 0.006*<br>(0.001,0.011)                                  | -0.007***<br>(-0.010,-0.004)                              |
| W South Central               | 0.014***<br>(0.010,0.018)                   | 0.111***<br>(0.097,0.124)                                | 0.017***<br>(0.011,0.023)                               | 0.003<br>(-0.002,0.007)                                  | -0.011***<br>(-0.014,-0.009)                              |
| Mountain                      | -0.033***<br>(-0.037,-0.028)                | 0.122***<br>(0.103,0.141)                                | -0.007<br>(-0.015,0.000)                                | 0.008*<br>(0.001,0.016)                                  | -0.019***<br>(-0.022,-0.016)                              |
| Pacific                       | -0.002<br>(-0.007,0.004)                    | 0.170***<br>(0.151,0.189)                                | 0.008<br>(-0.000,0.017)                                 | 0.001<br>(-0.006,0.007)                                  | -0.016***<br>(-0.019,-0.013)                              |
| Race/ethnicity                | -0.007***<br>(-0.010,-0.005)                | 0.020***<br>(0.013,0.028)                                | 0.004*<br>(0.001,0.008)                                 | 0.009***<br>(0.006,0.012)                                | -0.002**<br>(-0.003,-0.001)                               |
| Unknown/other                 | ref.                                        | ref.                                                     | ref.                                                    | ref.                                                     | ref.                                                      |
| White                         | 0.011***<br>(0.009,0.013)                   | -0.010**<br>(-0.017,-0.003)                              | 0.005**<br>(0.002,0.008)                                | 0.008***<br>(0.006,0.011)                                | 0.004***<br>(0.003,0.005)                                 |
| Black                         | -0.016***<br>(-0.018,-0.013)                | 0.086***<br>(0.077,0.095)                                | 0.011***<br>(0.006,0.015)                               | 0.010***<br>(0.007,0.014)                                | -0.008***<br>(-0.009,-0.006)                              |
| Hispanic                      | -0.012***<br>(-0.016,-0.007)                | 0.020*<br>(0.002,0.039)                                  | 0.002<br>(-0.007,0.010)                                 | 0.007<br>(-0.000,0.014)                                  | -0.001<br>(-0.004,0.001)                                  |
| Asian                         | ref.                                        | ref.                                                     | ref.                                                    | ref.                                                     | ref.                                                      |
| Comorbidities                 | 0.011***<br>(0.009,0.013)                   | 0.012**<br>(0.004,0.019)                                 | 0.005**<br>(0.001,0.009)                                | 0.004**<br>(0.001,0.007)                                 | 0.005***<br>(0.004,0.006)                                 |
| No diabetes                   | 0.029***<br>(0.027,0.031)                   | 0.008***<br>(0.002,0.014)                                | -0.002<br>(-0.005,0.001)                                | 0.002<br>(-0.000,0.004)                                  | 0.008***<br>(0.006,0.009)                                 |
| Diabetes without CC           | ref.                                        | ref.                                                     | ref.                                                    | ref.                                                     | ref.                                                      |
| Diabetes with CC              | 0.023***<br>(0.020,0.026)                   | -0.012**<br>(-0.019,-0.005)                              | -0.003<br>(-0.006,0.000)                                | -0.003*<br>(-0.005,-0.000)                               | -0.001<br>(-0.003,0.001)                                  |
| Uncomp hypertension           | 0.020***<br>(0.018,0.022)                   | 0.027***<br>(0.022,0.033)                                | 0.001<br>(-0.001,0.004)                                 | -0.002<br>(-0.004,0.000)                                 | 0.008***<br>(0.006,0.009)                                 |
| Comp hypertension             | 0.093***<br>(0.091,0.096)                   | 0.077***<br>(0.071,0.082)                                | 0.017***<br>(0.015,0.020)                               | 0.002<br>(-0.000,0.004)                                  | 0.036***<br>(0.035,0.038)                                 |
| Coronary artery disease       | 0.061***<br>(0.059,0.063)                   | -0.010***<br>(-0.015,-0.005)                             | 0.015***<br>(0.013,0.018)                               | -0.007***<br>(-0.009,-0.006)                             | -0.002***<br>(-0.003,-0.001)                              |
| Congestive heart failure      | 0.019***<br>(0.017,0.022)                   | 0.012***<br>(0.005,0.018)                                | -0.001<br>(-0.004,0.003)                                | 0.001<br>(-0.001,0.003)                                  | 0.023***<br>(0.021,0.025)                                 |
| Chronic pulmonary diseases    | 0.046***<br>(0.042,0.051)                   | 0.035***<br>(0.025,0.045)                                | -0.003<br>(-0.008,0.002)                                | 0<br>(-0.004,0.004)                                      | 0.059***<br>(0.056,0.063)                                 |
| Renal failure                 | 0.122***<br>(0.115,0.130)                   | 0.01<br>(-0.003,0.024)                                   | 0.003<br>(-0.004,0.009)                                 | -0.010***<br>(-0.014,-0.006)                             | 0.136***<br>(0.130,0.142)                                 |
| Metastatic cancer             | 0.064***<br>(0.056,0.073)                   | -0.008<br>(-0.025,0.009)                                 | -0.001<br>(-0.009,0.007)                                | -0.010***<br>(-0.015,-0.004)                             | 0.027***<br>(0.021,0.033)                                 |
| Lymphoma                      | 0.036***<br>(0.033,0.040)                   | 0.018***<br>(0.009,0.027)                                | 0<br>(-0.004,0.005)                                     | -0.003*<br>(-0.006,-0.000)                               | 0.028***<br>(0.026,0.030)                                 |
| Non-metastatic solid tumor    | -0.008***<br>(-0.011,-0.006)                | 0.017***<br>(0.010,0.023)                                | 0.004**<br>(0.001,0.008)                                | 0.001<br>(-0.001,0.003)                                  | 0.018***<br>(0.017,0.020)                                 |
| Peripheral vascular disorders | 0.062***                                    | 0.062***                                                 | 0.005***                                                | -0.002*                                                  | 0.024***                                                  |
| Cardiac arrhythmias           |                                             |                                                          |                                                         |                                                          |                                                           |

Sensitivity analysis: ACEi/ARB monotherapy

|                                                          | (6)                          | (7)                         | (8)                         | (9)                         | (10)                         |
|----------------------------------------------------------|------------------------------|-----------------------------|-----------------------------|-----------------------------|------------------------------|
|                                                          | Inpatient stay               | Inpatient stay with ICU/CCU | Inpatient stay with ARD dx  | Inpatient stay with ARDS dx | Died same or following month |
|                                                          | (95% confidence interval)    | (95% confidence interval)   | (95% confidence interval)   | (95% confidence interval)   | (95% confidence interval)    |
| Rheumatoid arthritis/collagen vascular diseases          | 0.016***<br>(0.013,0.020)    | -0.005<br>(-0.016,0.006)    | -0.007**<br>(-0.012,-0.002) | 0<br>(-0.004,0.004)         | 0.004***<br>(0.002,0.006)    |
| Coagulopathy                                             | 0.029***<br>(0.024,0.033)    | 0.032***<br>(0.023,0.041)   | -0.004<br>(-0.008,0.000)    | 0.002<br>(-0.001,0.005)     | 0.035***<br>(0.032,0.038)    |
| Obesity                                                  | -0.002<br>(-0.004,0.000)     | 0.013***<br>(0.006,0.021)   | 0.004<br>(-0.000,0.007)     | 0.009***<br>(0.006,0.012)   | -0.008***<br>(-0.010,-0.007) |
| Chronic/acute deep vein thrombosis or pulmonary embolism | 0.061***<br>(0.055,0.067)    | 0.050***<br>(0.039,0.061)   | 0.003<br>(-0.003,0.009)     | 0.002<br>(-0.002,0.006)     | 0.030***<br>(0.026,0.034)    |
| Hemorrhagic or ischemic stroke                           | 0.016***<br>(0.013,0.019)    | 0.032***<br>(0.024,0.040)   | 0.002<br>(-0.001,0.006)     | -0.004**<br>(-0.007,-0.001) | 0.043***<br>(0.040,0.045)    |
| Valvular disease                                         | -0.009***<br>(-0.012,-0.006) | 0.045***<br>(0.038,0.052)   | 0.007***<br>(0.003,0.010)   | -0.002<br>(-0.004,0.001)    | 0.017***<br>(0.015,0.019)    |
| Constant                                                 | 0.058***<br>(0.053,0.063)    | 0.312***<br>(0.292,0.332)   | 0.020***<br>(0.011,0.029)   | 0.034***<br>(0.027,0.042)   | 0.012***<br>(0.009,0.015)    |
| N                                                        | 1059474                      | 167330                      | 167330                      | 167330                      | 1057707                      |
| N_clust                                                  | 728455                       | 147846                      | 147846                      | 147846                      | 727311                       |
| p                                                        | <0.001                       | <0.001                      | <0.001                      | <0.001                      | <0.001                       |
| R-squared                                                | 0.081                        | 0.037                       | 0.006                       | 0.008                       | 0.076                        |

For peer review only



## Sensitivity analysis: Dropping people with comorbidities (other than hypertension)

|                                           | (11)                                        | (12)                                                     | (13)                                                    | (14)                                                     | (15)                                                      |
|-------------------------------------------|---------------------------------------------|----------------------------------------------------------|---------------------------------------------------------|----------------------------------------------------------|-----------------------------------------------------------|
|                                           | Inpatient stay<br>(95% confidence interval) | Inpatient stay with ICU/CCU<br>(95% confidence interval) | Inpatient stay with ARD dx<br>(95% confidence interval) | Inpatient stay with ARDS dx<br>(95% confidence interval) | Died same or following month<br>(95% confidence interval) |
| Flu season / medication type              |                                             |                                                          |                                                         |                                                          |                                                           |
| 2017-2018 flu season                      | ref.                                        | ref.                                                     | ref.                                                    | ref.                                                     | ref.                                                      |
| 2018-2019 flu season                      | 0.002<br>(-0.001,0.006)                     | 0.02<br>(-0.032,0.072)                                   | 0.030**<br>(0.009,0.051)                                | 0.006<br>(-0.005,0.017)                                  | 0<br>(-0.002,0.002)                                       |
| 2019-2020 flu season                      | 0.032***<br>(0.028,0.035)                   | 0.068**<br>(0.024,0.111)                                 | 0.029***<br>(0.014,0.045)                               | 0.052***<br>(0.039,0.065)                                | 0.007***<br>(0.005,0.009)                                 |
| Other medications only                    | ref.                                        | ref.                                                     | ref.                                                    | ref.                                                     | ref.                                                      |
| ACEi or ARB plus/minus other medications  | -0.006***<br>(-0.009,-0.003)                | -0.001<br>(-0.049,0.046)                                 | 0.009<br>(-0.008,0.026)                                 | 0.003<br>(-0.007,0.013)                                  | -0.003***<br>(-0.004,-0.001)                              |
| ACEi or ARB monotherapy                   |                                             |                                                          |                                                         |                                                          |                                                           |
| 2018-2019 season: ACEi or ARB +- other    | -0.003<br>(-0.007,0.001)                    | 0.004<br>(-0.062,0.071)                                  | -0.013<br>(-0.041,0.014)                                | 0.001<br>(-0.015,0.017)                                  | 0.001<br>(-0.001,0.003)                                   |
| 2018-2019 season: ACEi or ARB monotherapy |                                             |                                                          |                                                         |                                                          |                                                           |
| 2019-2020 season: ACEi or ARB +/- other   | -0.001<br>(-0.006,0.003)                    | 0.05<br>(-0.006,0.106)                                   | -0.022*<br>(-0.043,-0.001)                              | -0.001<br>(-0.019,0.016)                                 | -0.001<br>(-0.003,0.001)                                  |
| 2019-2020 season: ACEi or ARB monotherapy |                                             |                                                          |                                                         |                                                          |                                                           |
| Demographics                              |                                             |                                                          |                                                         |                                                          |                                                           |
| Female                                    | -0.010***<br>(-0.012,-0.008)                | -0.025*<br>(-0.048,-0.003)                               | -0.01<br>(-0.019,0.000)                                 | -0.008<br>(-0.018,0.002)                                 | -0.003***<br>(-0.004,-0.002)                              |
| Age categories                            |                                             |                                                          |                                                         |                                                          |                                                           |
| <35                                       | -0.013***<br>(-0.017,-0.010)                | -0.125<br>(-0.286,0.037)                                 | 0.089<br>(-0.025,0.202)                                 | -0.017<br>(-0.074,0.040)                                 | -0.001**<br>(-0.002,-0.000)                               |
| 35-44                                     | -0.007***<br>(-0.009,-0.004)                | -0.151***<br>(-0.229,-0.074)                             | 0.014<br>(-0.026,0.055)                                 | -0.022<br>(-0.053,0.009)                                 | -0.001<br>(-0.001,0.000)                                  |
| 45-54                                     | ref.                                        | ref.                                                     | ref.                                                    | ref.                                                     | ref.                                                      |
| 55-64                                     | 0.003**<br>(0.001,0.006)                    | -0.041<br>(-0.091,0.009)                                 | -0.004<br>(-0.027,0.018)                                | 0.006<br>(-0.018,0.029)                                  | 0.001***<br>(0.001,0.002)                                 |
| 65-74                                     | 0.006***<br>(0.003,0.009)                   | -0.056*<br>(-0.109,-0.003)                               | -0.017<br>(-0.041,0.008)                                | 0.009<br>(-0.015,0.032)                                  | 0.001*<br>(0.000,0.002)                                   |
| 75-84                                     | 0.028***<br>(0.024,0.032)                   | -0.077**<br>(-0.132,-0.022)                              | -0.011<br>(-0.037,0.014)                                | 0.005<br>(-0.019,0.029)                                  | 0.008***<br>(0.007,0.010)                                 |
| 85+                                       | 0.074***<br>(0.068,0.079)                   | -0.139***<br>(-0.196,-0.083)                             | -0.022<br>(-0.048,0.004)                                | -0.007<br>(-0.032,0.017)                                 | 0.036***<br>(0.032,0.039)                                 |
| Insurance coverage type                   |                                             |                                                          |                                                         |                                                          |                                                           |
| Medicare Advantage                        | ref.                                        | ref.                                                     | ref.                                                    | ref.                                                     | ref.                                                      |
| Commercial                                | -0.013***<br>(-0.015,-0.010)                | -0.043*<br>(-0.083,-0.002)                               | -0.01<br>(-0.028,0.009)                                 | 0.006<br>(-0.011,0.024)                                  | -0.004***<br>(-0.005,-0.003)                              |
| Census region                             |                                             |                                                          |                                                         |                                                          |                                                           |
| Unknown/other                             | -0.034***<br>(-0.053,-0.014)                | 0.755***<br>(0.693,0.816)                                | -0.025*<br>(-0.050,-0.000)                              | -0.062***<br>(-0.089,-0.035)                             | 0.008<br>(-0.018,0.034)                                   |
| New England                               | ref.                                        | ref.                                                     | ref.                                                    | ref.                                                     | ref.                                                      |
| Mid Atlantic                              | -0.002<br>(-0.007,0.004)                    | 0.065*<br>(0.008,0.123)                                  | 0.015<br>(-0.008,0.038)                                 | 0.025<br>(-0.003,0.053)                                  | 0.002<br>(-0.001,0.005)                                   |
| South Atlantic                            | -0.004<br>(-0.009,0.001)                    | 0.164***<br>(0.113,0.214)                                | 0.012<br>(-0.007,0.032)                                 | -0.009<br>(-0.032,0.014)                                 | -0.001<br>(-0.004,0.001)                                  |

Sensitivity analysis: Dropping people with comorbidities (other than hypertension)

|                               | (11)                                        | (12)                                                     | (13)                                                    | (14)                                                     | (15)                                                      |
|-------------------------------|---------------------------------------------|----------------------------------------------------------|---------------------------------------------------------|----------------------------------------------------------|-----------------------------------------------------------|
|                               | Inpatient stay<br>(95% confidence interval) | Inpatient stay with ICU/CCU<br>(95% confidence interval) | Inpatient stay with ARD dx<br>(95% confidence interval) | Inpatient stay with ARDS dx<br>(95% confidence interval) | Died same or following month<br>(95% confidence interval) |
| E North Central               | 0.007**<br>(0.002,0.013)                    | 0.111***<br>(0.058,0.165)                                | 0.018<br>(-0.003,0.039)                                 | 0<br>(-0.024,0.024)                                      | 0<br>(-0.003,0.002)                                       |
| E South Central               | 0.001<br>(-0.005,0.007)                     | 0.116***<br>(0.055,0.176)                                | 0.01<br>(-0.014,0.034)                                  | -0.004<br>(-0.030,0.023)                                 | -0.001<br>(-0.003,0.002)                                  |
| W North Central               | 0.009**<br>(0.003,0.015)                    | 0.124***<br>(0.063,0.184)                                | 0.021<br>(-0.004,0.046)                                 | -0.002<br>(-0.028,0.025)                                 | 0.002<br>(-0.001,0.004)                                   |
| W South Central               | 0.001<br>(-0.004,0.007)                     | 0.142***<br>(0.086,0.199)                                | 0.025*<br>(0.002,0.049)                                 | 0.007<br>(-0.019,0.034)                                  | 0<br>(-0.002,0.003)                                       |
| Mountain                      | -0.005<br>(-0.011,0.001)                    | -0.161***<br>(0.087,0.235)                               | -0.005<br>(-0.031,0.020)                                | 0.019<br>(-0.017,0.055)                                  | -0.002<br>(-0.005,0.001)                                  |
| Pacific                       | 0<br>(-0.007,0.006)                         | 0.173***<br>(0.093,0.253)                                | -0.004<br>(-0.032,0.024)                                | -0.008<br>(-0.041,0.025)                                 | -0.003<br>(-0.005,0.000)                                  |
| Race/ethnicity                | 0.001<br>(-0.002,0.004)                     | 0.056**<br>(0.022,0.089)                                 | 0.002<br>(-0.012,0.016)                                 | 0.009<br>(-0.006,0.023)                                  | 0<br>(-0.001,0.001)                                       |
| Unknown/other                 | ref.                                        | ref.                                                     | ref.                                                    | ref.                                                     | ref.                                                      |
| White                         | 0.008***<br>(0.006,0.011)                   | 0<br>(-0.031,0.032)                                      | 0.003<br>(-0.010,0.016)                                 | 0.01<br>(-0.003,0.023)                                   | 0.001<br>(-0.000,0.002)                                   |
| Black                         | -0.001<br>(-0.004,0.001)                    | 0.092***<br>(0.054,0.130)                                | 0.016<br>(-0.001,0.034)                                 | 0.035***<br>(0.015,0.055)                                | -0.001*<br>(-0.003,-0.000)                                |
| Hispanic                      | -0.007**<br>(-0.011,-0.002)                 | 0.029<br>(-0.045,0.103)                                  | -0.018<br>(-0.042,0.007)                                | 0.018<br>(-0.018,0.055)                                  | -0.002<br>(-0.004,0.000)                                  |
| Asian                         |                                             |                                                          |                                                         |                                                          |                                                           |
| Comorbidities                 |                                             |                                                          |                                                         |                                                          |                                                           |
| No diabetes                   |                                             |                                                          |                                                         |                                                          |                                                           |
| Diabetes without CC           |                                             |                                                          |                                                         |                                                          |                                                           |
| Diabetes with CC              |                                             |                                                          |                                                         |                                                          |                                                           |
| Uncomp hypertension           | ref.                                        | ref.                                                     | ref.                                                    | ref.                                                     | ref.                                                      |
| Comp hypertension             | 0.014***<br>(0.007,0.021)                   | -0.009<br>(-0.068,0.050)                                 | -0.009<br>(-0.032,0.013)                                | -0.017<br>(-0.036,0.003)                                 | 0.006**<br>(0.002,0.010)                                  |
| Coronary artery disease       |                                             |                                                          |                                                         |                                                          |                                                           |
| Congestive heart failure      |                                             |                                                          |                                                         |                                                          |                                                           |
| Chronic pulmonary diseases    |                                             |                                                          |                                                         |                                                          |                                                           |
| Renal failure                 |                                             |                                                          |                                                         |                                                          |                                                           |
| Liver failure                 |                                             |                                                          |                                                         |                                                          |                                                           |
| Metastatic cancer             |                                             |                                                          |                                                         |                                                          |                                                           |
| Lymphoma                      |                                             |                                                          |                                                         |                                                          |                                                           |
| Non-metastatic solid tumor    |                                             |                                                          |                                                         |                                                          |                                                           |
| Peripheral vascular disorders |                                             |                                                          |                                                         |                                                          |                                                           |
| Cardiac arrhythmias           |                                             |                                                          |                                                         |                                                          |                                                           |

Sensitivity analysis: Dropping people with comorbidities (other than hypertension)

1  
2  
3  
4  
5  
6  
7  
8  
9  
10  
11  
12  
13  
14  
15  
16  
17  
18  
19  
20  
21  
22  
23  
24  
25  
26  
27  
28  
29  
30  
31  
32  
33  
34  
35  
36  
37  
38  
39  
40  
41  
42  
43  
44  
45  
46  
47

|                                                          | (11)                                        | (12)                                                     | (13)                                                    | (14)                                                     | (15)                                                      |
|----------------------------------------------------------|---------------------------------------------|----------------------------------------------------------|---------------------------------------------------------|----------------------------------------------------------|-----------------------------------------------------------|
|                                                          | Inpatient stay<br>(95% confidence interval) | Inpatient stay with ICU/CCU<br>(95% confidence interval) | Inpatient stay with ARD dx<br>(95% confidence interval) | Inpatient stay with ARDS dx<br>(95% confidence interval) | Died same or following month<br>(95% confidence interval) |
| Rheumatoid arthritis/collagen vascular diseases          |                                             |                                                          |                                                         |                                                          |                                                           |
| Coagulopathy                                             |                                             |                                                          |                                                         |                                                          |                                                           |
| Obesity                                                  |                                             |                                                          |                                                         |                                                          |                                                           |
| Chronic/acute deep vein thrombosis or pulmonary embolism |                                             |                                                          |                                                         |                                                          |                                                           |
| Hemorrhagic or ischemic stroke                           |                                             |                                                          |                                                         |                                                          |                                                           |
| Valvular disease                                         |                                             |                                                          |                                                         |                                                          |                                                           |
| Constant                                                 | 0.027***<br>(0.020,0.033)                   | 0.268***<br>(0.190,0.347)                                | 0.027<br>(-0.003,0.058)                                 | 0.006<br>(-0.026,0.038)                                  | 0.006***<br>(0.003,0.009)                                 |
| N                                                        | 200778                                      | 7696                                                     | 7696                                                    | 7696                                                     | 200508                                                    |
| N_clust                                                  | 175494                                      | 7647                                                     | 7647                                                    | 7647                                                     | 175251                                                    |
| p                                                        | <0.001                                      |                                                          |                                                         |                                                          | <0.001                                                    |
| R-squared                                                | 0.022                                       | 0.033                                                    | 0.007                                                   | 0.023                                                    | 0.015                                                     |

For peer review only

**Sensitivity analysis: limiting analysis to strict flu season (dropping summer months)**

|                                           | (16)                                        | (17)                                                     | (18)                                                    | (19)                                                     | (20)                                                      |
|-------------------------------------------|---------------------------------------------|----------------------------------------------------------|---------------------------------------------------------|----------------------------------------------------------|-----------------------------------------------------------|
|                                           | Inpatient stay<br>(95% confidence interval) | Inpatient stay with ICU/CCU<br>(95% confidence interval) | Inpatient stay with ARD dx<br>(95% confidence interval) | Inpatient stay with ARDS dx<br>(95% confidence interval) | Died same or following month<br>(95% confidence interval) |
| Flu season / medication type              |                                             |                                                          |                                                         |                                                          |                                                           |
| 2017-2018 flu season                      | ref.                                        | ref.                                                     | ref.                                                    | ref.                                                     | ref.                                                      |
| 2018-2019 flu season                      | 0<br>(-0.004,0.003)                         | 0.009<br>(-0.002,0.019)                                  | 0.017***<br>(0.012,0.022)                               | -0.007***<br>(-0.010,-0.003)                             | 0<br>(-0.002,0.002)                                       |
| 2019-2020 flu season                      | 0.003*<br>(0.000,0.007)                     | 0.030***<br>(0.020,0.041)                                | 0.017***<br>(0.011,0.022)                               | 0.010***<br>(0.006,0.014)                                | 0.017***<br>(0.015,0.020)                                 |
| Other medications only                    | ref.                                        | ref.                                                     | ref.                                                    | ref.                                                     | ref.                                                      |
| ACEi or ARB plus/minus other medications  | -0.016***<br>(-0.019,-0.013)                | -0.01<br>(-0.021,0.000)                                  | -0.007**<br>(-0.011,-0.002)                             | -0.003<br>(-0.006,0.001)                                 | -0.009***<br>(-0.010,-0.007)                              |
| ACEi or ARB monotherapy                   |                                             |                                                          |                                                         |                                                          |                                                           |
| 2018-2019 season: ACEi or ARB +/- other   | 0.002<br>(-0.002,0.006)                     | 0.01<br>(-0.004,0.025)                                   | 0.001<br>(-0.006,0.008)                                 | 0<br>(-0.005,0.004)                                      | 0<br>(-0.003,0.002)                                       |
| 2018-2019 season: ACEi or ARB monotherapy |                                             |                                                          |                                                         |                                                          |                                                           |
| 2019-2020 season: ACEi or ARB +/- other   | 0.008***<br>(0.004,0.012)                   | 0.012<br>(-0.003,0.026)                                  | 0.008*<br>(0.001,0.014)                                 | 0.008**<br>(0.002,0.013)                                 | -0.005***<br>(-0.008,-0.002)                              |
| 2019-2020 season: ACEi or ARB monotherapy |                                             |                                                          |                                                         |                                                          |                                                           |
| Demographics                              |                                             |                                                          |                                                         |                                                          |                                                           |
| Female                                    | -0.011***<br>(-0.012,-0.009)                | -0.024***<br>(-0.030,-0.017)                             | 0.001<br>(-0.002,0.004)                                 | -0.001<br>(-0.003,0.001)                                 | -0.009***<br>(-0.010,-0.008)                              |
| Age categories                            |                                             |                                                          |                                                         |                                                          |                                                           |
| <35                                       | 0<br>(-0.006,0.006)                         | -0.051<br>(-0.111,0.009)                                 | 0.012<br>(-0.020,0.044)                                 | -0.014<br>(-0.035,0.006)                                 | -0.001<br>(-0.003,0.001)                                  |
| 35-44                                     | -0.005**<br>(-0.009,-0.002)                 | -0.027<br>(-0.063,0.009)                                 | 0.005<br>(-0.013,0.023)                                 | -0.008<br>(-0.022,0.006)                                 | 0.001<br>(-0.000,0.002)                                   |
| 45-54                                     | ref.                                        | ref.                                                     | ref.                                                    | ref.                                                     | ref.                                                      |
| 55-64                                     | 0.009***<br>(0.006,0.012)                   | 0.005<br>(-0.014,0.023)                                  | 0<br>(-0.009,0.009)                                     | -0.002<br>(-0.009,0.005)                                 | 0<br>(-0.001,0.001)                                       |
| 65-74                                     | 0.009***<br>(0.006,0.012)                   | -0.009<br>(-0.027,0.009)                                 | -0.002<br>(-0.011,0.007)                                | -0.003<br>(-0.010,0.004)                                 | 0.006***<br>(0.005,0.008)                                 |
| 75-84                                     | 0.027***<br>(0.023,0.030)                   | -0.033***<br>(-0.051,-0.015)                             | -0.005<br>(-0.013,0.004)                                | -0.007<br>(-0.014,0.000)                                 | 0.022***<br>(0.020,0.023)                                 |
| 85+                                       | 0.049***<br>(0.045,0.053)                   | -0.078***<br>(-0.097,-0.059)                             | -0.012*<br>(-0.021,-0.003)                              | -0.015***<br>(-0.022,-0.008)                             | 0.062***<br>(0.060,0.065)                                 |
| Insurance coverage type                   |                                             |                                                          |                                                         |                                                          |                                                           |
| Medicare Advantage                        | ref.                                        | ref.                                                     | ref.                                                    | ref.                                                     | ref.                                                      |
| Commercial                                | -0.028***<br>(-0.030,-0.025)                | 0.006<br>(-0.007,0.019)                                  | 0.002<br>(-0.005,0.008)                                 | 0.004<br>(-0.001,0.009)                                  | 0.001<br>(-0.000,0.002)                                   |
| Census region                             |                                             |                                                          |                                                         |                                                          |                                                           |
| Unknown/other                             | -0.035<br>(-0.071,0.000)                    | 0.219*<br>(0.012,0.426)                                  | -0.003<br>(-0.099,0.094)                                | 0.016<br>(-0.085,0.117)                                  | -0.024*<br>(-0.048,-0.000)                                |
| New England                               | ref.                                        | ref.                                                     | ref.                                                    | ref.                                                     | ref.                                                      |
| Mid Atlantic                              | 0<br>(-0.005,0.005)                         | 0.018*<br>(0.002,0.035)                                  | 0.021***<br>(0.014,0.029)                               | 0.022***<br>(0.015,0.028)                                | 0.002<br>(-0.001,0.006)                                   |
| South Atlantic                            | -0.012***<br>(-0.017,-0.008)                | 0.121***<br>(0.107,0.135)                                | 0.014***<br>(0.007,0.020)                               | -0.004<br>(-0.009,0.001)                                 | -0.019***<br>(-0.022,-0.016)                              |

## Sensitivity analysis: limiting analysis to strict flu season (dropping summer months)

|                               | (16)                                        | (17)                                                     | (18)                                                    | (19)                                                     | (20)                                                      |
|-------------------------------|---------------------------------------------|----------------------------------------------------------|---------------------------------------------------------|----------------------------------------------------------|-----------------------------------------------------------|
|                               | Inpatient stay<br>(95% confidence interval) | Inpatient stay with ICU/CCU<br>(95% confidence interval) | Inpatient stay with ARD dx<br>(95% confidence interval) | Inpatient stay with ARDS dx<br>(95% confidence interval) | Died same or following month<br>(95% confidence interval) |
| E North Central               | 0.008***<br>(0.003,0.013)                   | 0.073***<br>(0.058,0.089)                                | 0.004<br>(-0.003,0.011)                                 | -0.008**<br>(-0.013,-0.002)                              | -0.012***<br>(-0.015,-0.009)                              |
| E South Central               | -0.006*<br>(-0.011,-0.001)                  | 0.069***<br>(0.051,0.087)                                | 0.015***<br>(0.007,0.023)                               | -0.010**<br>(-0.016,-0.004)                              | -0.014***<br>(-0.017,-0.010)                              |
| W North Central               | 0.013***<br>(0.008,0.018)                   | 0.091***<br>(0.074,0.109)                                | 0.003<br>(-0.005,0.011)                                 | -0.004<br>(-0.010,0.002)                                 | -0.012***<br>(-0.015,-0.009)                              |
| W South Central               | -0.002<br>(-0.007,0.002)                    | 0.100***<br>(0.083,0.116)                                | 0.016***<br>(0.008,0.024)                               | -0.008**<br>(-0.014,-0.003)                              | -0.017***<br>(-0.020,-0.014)                              |
| Mountain                      | -0.040***<br>(-0.046,-0.035)                | 0.115***<br>(0.091,0.138)                                | -0.009<br>(-0.019,0.001)                                | -0.006<br>(-0.014,0.002)                                 | -0.020***<br>(-0.024,-0.017)                              |
| Pacific                       | -0.008*<br>(-0.014,-0.001)                  | 0.180***<br>(0.158,0.203)                                | 0.005<br>(-0.006,0.015)                                 | -0.006<br>(-0.014,0.002)                                 | -0.017***<br>(-0.021,-0.013)                              |
| Race/ethnicity                |                                             |                                                          |                                                         |                                                          |                                                           |
| Unknown/other                 | -0.007***<br>(-0.010,-0.005)                | 0.013*<br>(0.003,0.023)                                  | 0.003<br>(-0.002,0.009)                                 | 0.005**<br>(0.001,0.009)                                 | 0<br>(-0.001,0.002)                                       |
| White                         | ref.                                        | ref.                                                     | ref.                                                    | ref.                                                     | ref.                                                      |
| Black                         | 0.011***<br>(0.009,0.014)                   | -0.012**<br>(-0.021,-0.004)                              | 0.005*<br>(0.000,0.009)                                 | 0.010***<br>(0.007,0.014)                                | 0.004***<br>(0.002,0.005)                                 |
| Hispanic                      | -0.015***<br>(-0.018,-0.013)                | 0.079***<br>(0.068,0.090)                                | 0.010***<br>(0.004,0.015)                               | 0.007**<br>(0.003,0.011)                                 | -0.008***<br>(-0.010,-0.007)                              |
| Asian                         | -0.011***<br>(-0.016,-0.005)                | 0.005<br>(-0.017,0.027)                                  | 0.002<br>(-0.009,0.012)                                 | 0.006<br>(-0.002,0.015)                                  | -0.002<br>(-0.005,0.001)                                  |
| Comorbidities                 |                                             |                                                          |                                                         |                                                          |                                                           |
| No diabetes                   | ref.                                        | ref.                                                     | ref.                                                    | ref.                                                     | ref.                                                      |
| Diabetes without CC           | 0.006***<br>(0.004,0.009)                   | 0.012*<br>(0.003,0.022)                                  | 0.004<br>(-0.000,0.009)                                 | 0.003<br>(-0.001,0.006)                                  | 0.004***<br>(0.003,0.005)                                 |
| Diabetes with CC              | 0.026***<br>(0.024,0.028)                   | 0.006<br>(-0.001,0.013)                                  | -0.003<br>(-0.006,0.001)                                | 0<br>(-0.002,0.003)                                      | 0.007***<br>(0.006,0.008)                                 |
| Uncomp hypertension           | ref.                                        | ref.                                                     | ref.                                                    | ref.                                                     | ref.                                                      |
| Comp hypertension             | 0.023***<br>(0.020,0.026)                   | -0.009*<br>(-0.018,-0.000)                               | -0.004<br>(-0.008,0.000)                                | 0<br>(-0.003,0.003)                                      | -0.001<br>(-0.003,0.001)                                  |
| Coronary artery disease       | 0.018***<br>(0.016,0.020)                   | 0.031***<br>(0.025,0.038)                                | 0<br>(-0.003,0.004)                                     | -0.001<br>(-0.003,0.001)                                 | 0.006***<br>(0.004,0.007)                                 |
| Congestive heart failure      | 0.101***<br>(0.098,0.104)                   | 0.078***<br>(0.072,0.085)                                | 0.018***<br>(0.015,0.022)                               | 0.004***<br>(0.002,0.007)                                | 0.038***<br>(0.037,0.040)                                 |
| Chronic pulmonary diseases    | 0.074***<br>(0.072,0.076)                   | -0.010**<br>(-0.016,-0.004)                              | 0.015***<br>(0.012,0.018)                               | -0.005***<br>(-0.007,-0.002)                             | 0<br>(-0.001,0.001)                                       |
| Renal failure                 | 0.019***<br>(0.016,0.022)                   | 0.012**<br>(0.004,0.020)                                 | 0<br>(-0.004,0.004)                                     | 0.001<br>(-0.002,0.004)                                  | 0.023***<br>(0.021,0.025)                                 |
| Liver failure                 | 0.041***<br>(0.036,0.047)                   | 0.037***<br>(0.024,0.050)                                | 0<br>(-0.006,0.007)                                     | 0.004<br>(-0.001,0.009)                                  | 0.057***<br>(0.053,0.062)                                 |
| Metastatic cancer             | 0.118***<br>(0.109,0.127)                   | 0.007<br>(-0.010,0.023)                                  | 0.001<br>(-0.007,0.010)                                 | -0.008**<br>(-0.013,-0.003)                              | 0.138***<br>(0.131,0.146)                                 |
| Lymphoma                      | 0.064***<br>(0.054,0.073)                   | -0.009<br>(-0.030,0.012)                                 | -0.001<br>(-0.011,0.009)                                | -0.009**<br>(-0.015,-0.002)                              | 0.023***<br>(0.016,0.029)                                 |
| Non-metastatic solid tumor    | 0.038***<br>(0.034,0.042)                   | 0.021***<br>(0.010,0.032)                                | 0.002<br>(-0.003,0.008)                                 | -0.004*<br>(-0.007,-0.000)                               | 0.030***<br>(0.027,0.033)                                 |
| Peripheral vascular disorders | -0.001<br>(-0.004,0.002)                    | 0.016***<br>(0.008,0.024)                                | 0.005*<br>(0.001,0.009)                                 | 0.004**<br>(0.001,0.007)                                 | 0.023***<br>(0.021,0.025)                                 |
| Cardiac arrhythmias           | 0.063***                                    | 0.065***                                                 | 0.005**                                                 | -0.001                                                   | 0.023***                                                  |

## Sensitivity analysis: limiting analysis to strict flu season (dropping summer months)

|                                                          | (16)                        | (17)                        | (18)                       | (19)                        | (20)                         |
|----------------------------------------------------------|-----------------------------|-----------------------------|----------------------------|-----------------------------|------------------------------|
|                                                          | Inpatient stay              | Inpatient stay with ICU/CCU | Inpatient stay with ARD dx | Inpatient stay with ARDS dx | Died same or following month |
|                                                          | (95% confidence interval)   | (95% confidence interval)   | (95% confidence interval)  | (95% confidence interval)   | (95% confidence interval)    |
| Rheumatoid arthritis/collagen vascular diseases          | 0.015***<br>(0.061,0.066)   | -0.013<br>(0.058,0.071)     | -0.008*<br>(0.002,0.008)   | -0.001<br>(-0.003,0.002)    | 0.002<br>(0.021,0.025)       |
| Coagulopathy                                             | 0.035***<br>(0.010,0.019)   | 0.032***<br>(-0.026,0.001)  | -0.002<br>(-0.014,-0.002)  | 0.001<br>(-0.005,0.004)     | 0.039***<br>(-0.000,0.005)   |
| Obesity                                                  | -0.002<br>(0.030,0.041)     | 0.016***<br>(0.021,0.043)   | 0.004<br>(-0.008,0.003)    | 0.008***<br>(-0.004,0.005)  | -0.008***<br>(0.035,0.043)   |
| Chronic/acute deep vein thrombosis or pulmonary embolism | 0.053***<br>(-0.005,0.000)  | 0.052***<br>(0.007,0.026)   | 0.005<br>(-0.001,0.009)    | 0.002<br>(0.005,0.012)      | 0.026***<br>(-0.010,-0.006)  |
| Hemorrhagic or ischemic stroke                           | 0.018***<br>(0.046,0.061)   | 0.030***<br>(0.038,0.066)   | 0.005<br>(-0.003,0.012)    | -0.003<br>(-0.004,0.007)    | 0.044***<br>(0.021,0.031)    |
| Valvular disease                                         | -0.008***<br>(0.014,0.022)  | 0.053***<br>(0.020,0.040)   | 0.008***<br>(-0.000,0.010) | -0.001<br>(-0.007,0.000)    | 0.016***<br>(0.041,0.047)    |
| Constant                                                 | 0.057***<br>(-0.012,-0.005) | 0.314***<br>(0.044,0.061)   | 0.022***<br>(0.003,0.012)  | 0.037***<br>(-0.004,0.003)  | 0.013***<br>(0.014,0.019)    |
| N                                                        | 738240<br>(0.051,0.063)     | 106917<br>(0.290,0.338)     | 106917<br>(0.010,0.033)    | 106917<br>(0.028,0.046)     | 737059<br>(0.010,0.017)      |
| N_clust                                                  | 556579                      | 97383                       | 97383                      | 97383                       | 555729                       |
| p                                                        | <0.001                      | <0.001                      | <0.001                     | <0.001                      | <0.001                       |
| R-squared                                                | 0.094                       | 0.039                       | 0.007                      | 0.008                       | 0.082                        |

## Primary analysis

|                                                                                    | (1)                          | (2)                         | (3)                         | (4)                          | (5)                          |
|------------------------------------------------------------------------------------|------------------------------|-----------------------------|-----------------------------|------------------------------|------------------------------|
|                                                                                    | Inpatient stay               | Inpatient stay with ICU/CCU | Inpatient stay with ARD dx  | Inpatient stay with ARDS dx  | Died same or following month |
| <b>Key coefficient estimates</b>                                                   |                              |                             |                             |                              |                              |
| <b>Season</b>                                                                      |                              |                             |                             |                              |                              |
| 2017-2018 flu season                                                               | ref.                         | ref.                        | ref.                        | ref.                         | ref.                         |
| 2018-2019 flu season                                                               | -0.001<br>(-0.004,0.002)     | 0.008<br>(-0.002,0.018)     | 0.013***<br>(0.008,0.017)   | -0.007***<br>(-0.010,-0.004) | 0.000<br>(-0.002,0.002)      |
| 2019-2020 flu season                                                               | 0.018***<br>(0.015,0.021)    | 0.035***<br>(0.026,0.044)   | 0.013***<br>(0.008,0.017)   | 0.013***<br>(0.009,0.016)    | 0.016***<br>(0.014,0.017)    |
| <b>HTN medication group</b>                                                        |                              |                             |                             |                              |                              |
| Other medications only                                                             | ref.                         | ref.                        | ref.                        | ref.                         | ref.                         |
| ACEi or ARB plus/minus other medications                                           | -0.019***<br>(-0.022,-0.016) | -0.009<br>(-0.019,0.001)    | -0.007**<br>(-0.011,-0.002) | -0.003<br>(-0.007,0.000)     | -0.009***<br>(-0.011,-0.008) |
| ACEi or ARB monotherapy                                                            | N/A                          | N/A                         | N/A                         | N/A                          | N/A                          |
| <b>Season/medication interactions</b>                                              |                              |                             |                             |                              |                              |
| 2018-2019 season: ACEi or ARB +- other                                             | 0.004*<br>(0.001,0.008)      | 0.01<br>(-0.004,0.023)      | 0.004<br>(-0.003,0.010)     | 0<br>(-0.004,0.004)          | 0<br>(-0.002,0.002)          |
| 2018-2019 season: ACEi or ARB monotherapy                                          | N/A                          | N/A                         | N/A                         | N/A                          | N/A                          |
| 2019-2020 season: ACEi or ARB +/- other                                            | 0.015***<br>(0.012,0.019)    | 0.015*<br>(0.003,0.027)     | 0.007*<br>(0.001,0.012)     | 0.009***<br>(0.004,0.013)    | -0.002<br>(-0.004,0.001)     |
| 2019-2020 season: ACEi or ARB monotherapy                                          | N/A                          | N/A                         | N/A                         | N/A                          | N/A                          |
| Note: p-value for coefficients is for the null hypothesis that the coefficient = 0 |                              |                             |                             |                              |                              |
| <b>Marginal effects/predicted probability</b>                                      |                              |                             |                             |                              |                              |
| <b>Other hypertension medications only</b>                                         |                              |                             |                             |                              |                              |
| 2017/18                                                                            | 0.179<br>(0.177,0.181)       | 0.482<br>(0.474,0.489)      | 0.053<br>(0.050,0.056)      | 0.030<br>(0.028,0.033)       | 0.064<br>(0.062,0.065)       |
| 2018/19                                                                            | 0.178<br>(0.176,0.180)       | 0.490<br>(0.483,0.496)      | 0.066<br>(0.062,0.069)      | 0.023<br>(0.021,0.025)       | 0.064<br>(0.063,0.065)       |
| 2019/20                                                                            | 0.196<br>(0.195,0.198)       | 0.516<br>(0.511,0.521)      | 0.066<br>(0.063,0.068)      | 0.043<br>(0.041,0.045)       | 0.080<br>(0.078,0.081)       |

**Primary analysis**

|                                                 | (1)                       | (2)                         | (3)                        | (4)                         | (5)                          |
|-------------------------------------------------|---------------------------|-----------------------------|----------------------------|-----------------------------|------------------------------|
|                                                 | Inpatient stay            | Inpatient stay with ICU/CCU | Inpatient stay with ARD dx | Inpatient stay with ARDS dx | Died same or following month |
| <b>ACEi or ARB plus/minus other medications</b> |                           |                             |                            |                             |                              |
| 2017/18                                         | 0.125<br>(0.124,0.127)    | 0.463<br>(0.456,0.470)      | 0.045<br>(0.042,0.048)     | 0.029<br>(0.027,0.031)      | 0.035<br>(0.034,0.035)       |
| 2018/19                                         | 0.128<br>(0.127,0.130)    | 0.481<br>(0.475,0.487)      | 0.061<br>(0.058,0.064)     | 0.021<br>(0.020,0.023)      | 0.034<br>(0.034,0.035)       |
| 2019/20                                         | 0.158<br>(0.157,0.160)    | 0.512<br>(0.508,0.517)      | 0.064<br>(0.062,0.066)     | 0.050<br>(0.048,0.052)      | 0.049<br>(0.048,0.049)       |
| <b>ACEi or ARB monotherapy</b>                  |                           |                             |                            |                             |                              |
| 2017/18                                         | N/A                       | N/A                         | N/A                        | N/A                         | N/A                          |
| 2018/19                                         | N/A                       | N/A                         | N/A                        | N/A                         | N/A                          |
| 2019/20                                         | N/A                       | N/A                         | N/A                        | N/A                         | N/A                          |
| <b>Risk ratios of marginal effects</b>          |                           |                             |                            |                             |                              |
| <b>Other hypertension medications only</b>      |                           |                             |                            |                             |                              |
| 2018/19 season vs. 2017/18                      | 0.994<br>(0.977,1.011)    | 1.017<br>(0.996,1.038)      | 1.236***<br>(1.136,1.337)  | 0.759***<br>(0.668,0.850)   | 0.999<br>(0.969,1.030)       |
| 2019/20 season vs. 2017/18                      | 1.099***<br>(1.081,1.116) | 1.072***<br>(1.053,1.092)   | 1.238***<br>(1.147,1.330)  | 1.414***<br>(1.278,1.550)   | 1.244***<br>(1.210,1.278)    |
| <b>ACEi or ARB plus/minus other medications</b> |                           |                             |                            |                             |                              |
| 2018/19 season vs. 2017/18                      | 1.025**<br>(1.009,1.042)  | 1.039***<br>(1.019,1.058)   | 1.360***<br>(1.251,1.469)  | 0.739***<br>(0.656,0.822)   | 0.993<br>(0.961,1.025)       |
| 2019/20 season vs. 2017/18                      | 1.264***<br>(1.245,1.282) | 1.107***<br>(1.088,1.126)   | 1.437***<br>(1.332,1.542)  | 1.731***<br>(1.580,1.882)   | 1.404***<br>(1.363,1.444)    |
| <b>ACEi or ARB monotherapy</b>                  |                           |                             |                            |                             |                              |
| 2018/19 season vs. 2017/18                      | N/A                       | N/A                         | N/A                        | N/A                         | N/A                          |
| 2019/20 season vs. 2017/18                      | N/A                       | N/A                         | N/A                        | N/A                         | N/A                          |
| Number of episodes                              | 1,059,474                 | 167,330                     | 167,330                    | 167,330                     | 1,057,707                    |
| Number of people                                | 728,455                   | 147,846                     | 147,846                    | 147,846                     | 727,311                      |

Note: p-value for risk ratios is for the null hypothesis that the risk ratio = 1

N/A: variable not included in model

\* p<0.05, \*\* p<0.01, \*\*\* p<0.001



## Sensitivity analysis: ACEi/ARB monotherapy

|                                                      | (6)                          | (7)                          | (8)                         | (9)                          | (10)                         |
|------------------------------------------------------|------------------------------|------------------------------|-----------------------------|------------------------------|------------------------------|
|                                                      | Inpatient stay               | Inpatient stay with ICU/CCU  | Inpatient stay with ARD dx  | Inpatient stay with ARDS dx  | Died same or following month |
| <b>Key coefficient estimates</b>                     |                              |                              |                             |                              |                              |
| <b>Season</b>                                        |                              |                              |                             |                              |                              |
| 2017-2018 flu season                                 | ref.                         | ref.                         | ref.                        | ref.                         | ref.                         |
| 2018-2019 flu season                                 | -0.001<br>(-0.004,0.002)     | 0.008<br>(-0.002,0.018)      | 0.013***<br>(0.008,0.017)   | -0.007***<br>(-0.010,-0.004) | 0<br>(-0.002,0.002)          |
| 2019-2020 flu season                                 | 0.018***<br>(0.015,0.021)    | 0.035***<br>(0.026,0.044)    | 0.013***<br>(0.008,0.017)   | 0.013***<br>(0.009,0.016)    | 0.016***<br>(0.014,0.017)    |
| <b>HTN medication group</b>                          |                              |                              |                             |                              |                              |
| Other medications only                               | ref.                         | ref.                         | ref.                        | ref.                         | ref.                         |
| ACEi or ARB plus/minus other medications             | -0.020***<br>(-0.023,-0.017) | -0.004<br>(-0.014,0.006)     | -0.007**<br>(-0.011,-0.002) | -0.002<br>(-0.006,0.001)     | -0.010***<br>(-0.012,-0.009) |
| ACEi or ARB monotherapy                              | -0.016***<br>(-0.020,-0.012) | -0.039***<br>(-0.057,-0.020) | -0.007<br>(-0.015,0.001)    | -0.009**<br>(-0.015,-0.003)  | -0.004***<br>(-0.006,-0.002) |
| <b>Season/medication interactions</b>                |                              |                              |                             |                              |                              |
| 2018-2019 season: ACEi or ARB +/- other              | 0.004*<br>(0.000,0.008)      | 0.004<br>(-0.009,0.018)      | 0.004<br>(-0.003,0.010)     | -0.001<br>(-0.005,0.004)     | -0.001<br>(-0.003,0.002)     |
| 2018-2019 season: ACEi or ARB monotherapy            | 0.005<br>(-0.001,0.010)      | 0.040**<br>(0.015,0.065)     | 0.002<br>(-0.009,0.013)     | 0.002<br>(-0.006,0.009)      | 0.001<br>(-0.002,0.004)      |
| 2019-2020 season: ACEi or ARB +/- other              | 0.015***<br>(0.011,0.019)    | 0.011<br>(-0.001,0.024)      | 0.007*<br>(0.002,0.013)     | 0.008***<br>(0.003,0.013)    | -0.001<br>(-0.004,0.001)     |
| 2019-2020 season: ACEi or ARB monotherapy            | 0.017***<br>(0.012,0.022)    | 0.035**<br>(0.013,0.057)     | 0.004<br>(-0.006,0.013)     | 0.012**<br>(0.004,0.020)     | -0.003*<br>(-0.006,-0.000)   |
| Note: p-value for coefficients is for the null hypot |                              |                              |                             |                              |                              |
| <b>Marginal effects/predicted probability</b>        |                              |                              |                             |                              |                              |
| <b>Other hypertension medications only</b>           |                              |                              |                             |                              |                              |
| 2017/18                                              | 0.179<br>(0.177,0.181)       | 0.481<br>(0.474,0.489)       | 0.053<br>(0.050,0.056)      | 0.030<br>(0.028,0.033)       | 0.064<br>(0.062,0.065)       |
| 2018/19                                              | 0.178<br>(0.176,0.180)       | 0.490<br>(0.483,0.496)       | 0.066<br>(0.062,0.069)      | 0.023<br>(0.021,0.025)       | 0.064<br>(0.063,0.065)       |
| 2019/20                                              | 0.196<br>(0.195,0.198)       | 0.516<br>(0.511,0.521)       | 0.066<br>(0.063,0.068)      | 0.043<br>(0.041,0.045)       | 0.079<br>(0.078,0.081)       |

**Sensitivity analysis: ACEi/ARB monotherapy**

|                                                 | (6)                       | (7)                         | (8)                        | (9)                         | (10)                         |
|-------------------------------------------------|---------------------------|-----------------------------|----------------------------|-----------------------------|------------------------------|
|                                                 | Inpatient stay            | Inpatient stay with ICU/CCU | Inpatient stay with ARD dx | Inpatient stay with ARDS dx | Died same or following month |
| <b>ACEi or ARB plus/minus other medications</b> |                           |                             |                            |                             |                              |
| 2017/18                                         | 0.133<br>(0.132,0.135)    | 0.473<br>(0.466,0.480)      | 0.046<br>(0.043,0.049)     | 0.030<br>(0.027,0.032)      | 0.037<br>(0.036,0.038)       |
| 2018/19                                         | 0.136<br>(0.135,0.138)    | 0.486<br>(0.479,0.492)      | 0.062<br>(0.059,0.065)     | 0.022<br>(0.020,0.024)      | 0.037<br>(0.036,0.038)       |
| 2019/20                                         | 0.166<br>(0.164,0.167)    | 0.519<br>(0.514,0.524)      | 0.066<br>(0.063,0.068)     | 0.050<br>(0.048,0.052)      | 0.052<br>(0.051,0.053)       |
| <b>ACEi or ARB monotherapy</b>                  |                           |                             |                            |                             |                              |
| 2017/18                                         | 0.093<br>(0.090,0.096)    | 0.408<br>(0.392,0.425)      | 0.040<br>(0.033,0.047)     | 0.024<br>(0.019,0.029)      | 0.024<br>(0.022,0.025)       |
| 2018/19                                         | 0.096<br>(0.094,0.099)    | 0.456<br>(0.441,0.472)      | 0.054<br>(0.047,0.061)     | 0.018<br>(0.014,0.022)      | 0.025<br>(0.023,0.026)       |
| 2019/20                                         | 0.127<br>(0.125,0.130)    | 0.478<br>(0.467,0.489)      | 0.056<br>(0.051,0.061)     | 0.048<br>(0.043,0.053)      | 0.036<br>(0.034,0.037)       |
| <b>Risk ratios of marginal effects</b>          |                           |                             |                            |                             |                              |
| <b>Other hypertension medications only</b>      |                           |                             |                            |                             |                              |
| 2018/19 season vs. 2017/18                      | 0.994<br>(0.977,1.011)    | 1.017<br>(0.996,1.038)      | 1.236***<br>(1.136,1.337)  | 0.759***<br>(0.668,0.850)   | 0.999<br>(0.969,1.030)       |
| 2019/20 season vs. 2017/18                      | 1.098***<br>(1.081,1.116) | 1.072***<br>(1.053,1.092)   | 1.238***<br>(1.147,1.330)  | 1.414***<br>(1.278,1.550)   | 1.243***<br>(1.209,1.278)    |
| <b>ACEi or ARB plus/minus other medications</b> |                           |                             |                            |                             |                              |
| 2018/19 season vs. 2017/18                      | 1.023*<br>(1.005,1.041)   | 1.027*<br>(1.006,1.048)     | 1.360***<br>(1.243,1.476)  | 0.735***<br>(0.647,0.824)   | 0.985<br>(0.950,1.019)       |
| 2019/20 season vs. 2017/18                      | 1.244***<br>(1.225,1.264) | 1.097***<br>(1.077,1.118)   | 1.441***<br>(1.329,1.554)  | 1.690***<br>(1.532,1.848)   | 1.382***<br>(1.339,1.425)    |
| <b>ACEi or ARB monotherapy</b>                  |                           |                             |                            |                             |                              |
| 2018/19 season vs. 2017/18                      | 1.037<br>(0.993,1.080)    | 1.117***<br>(1.058,1.177)   | 1.358*<br>(1.055,1.660)    | 0.766<br>(0.526,1.006)      | 1.047<br>(0.958,1.136)       |
| 2019/20 season vs. 2017/18                      | 1.369***<br>(1.318,1.420) | 1.170***<br>(1.115,1.226)   | 1.412**<br>(1.129,1.694)   | 2.028***<br>(1.537,2.519)   | 1.526***<br>(1.412,1.640)    |
| Number of episodes                              | 1,059,474                 | 167,330                     | 167,330                    | 167,330                     | 1,057,707                    |
| Number of people                                | 728,455                   | 147,846                     | 147,846                    | 147,846                     | 727,311                      |

Note: p-value for risk ratios is for the null hypothe

N/A: variable not included in model

\* p<0.05, \*\* p<0.01, \*\*\* p<0.001

### Sensitivity analysis: Dropping people with comorbidities (other than hypertension)

|                                                       | (11)                         | (12)                        | (13)                       | (14)                        | (15)                         |
|-------------------------------------------------------|------------------------------|-----------------------------|----------------------------|-----------------------------|------------------------------|
|                                                       | Inpatient stay               | Inpatient stay with ICU/CCU | Inpatient stay with ARD dx | Inpatient stay with ARDS dx | Died same or following month |
| <b>Key coefficient estimates</b>                      |                              |                             |                            |                             |                              |
| <b>Season</b>                                         |                              |                             |                            |                             |                              |
| 2017-2018 flu season                                  | ref.                         | ref.                        | ref.                       | ref.                        | ref.                         |
| 2018-2019 flu season                                  | 0.002<br>(-0.001,0.006)      | 0.02<br>(-0.032,0.072)      | 0.030**<br>(0.009,0.051)   | 0.006<br>(-0.005,0.017)     | 0<br>(-0.002,0.002)          |
| 2019-2020 flu season                                  | 0.032***<br>(0.028,0.035)    | 0.068**<br>(0.024,0.111)    | 0.029***<br>(0.014,0.045)  | 0.052***<br>(0.039,0.065)   | 0.007***<br>(0.005,0.009)    |
| <b>HTN medication group</b>                           |                              |                             |                            |                             |                              |
| Other medications only                                | ref.                         | ref.                        | ref.                       | ref.                        | ref.                         |
| ACEi or ARB plus/minus other medications              | -0.006***<br>(-0.009,-0.003) | -0.001<br>(-0.049,0.046)    | 0.009<br>(-0.008,0.026)    | 0.003<br>(-0.007,0.013)     | -0.003***<br>(-0.004,-0.001) |
| ACEi or ARB monotherapy                               | N/A                          | N/A                         | N/A                        | N/A                         | N/A                          |
| <b>Season/medication interactions</b>                 |                              |                             |                            |                             |                              |
| 2018-2019 season: ACEi or ARB +- other                | -0.003<br>(-0.007,0.001)     | 0.004<br>(-0.062,0.071)     | -0.013<br>(-0.041,0.014)   | 0.001<br>(-0.015,0.017)     | 0.001<br>(-0.001,0.003)      |
| 2018-2019 season: ACEi or ARB monotherapy             | N/A                          | N/A                         | N/A                        | N/A                         | N/A                          |
| 2019-2020 season: ACEi or ARB +/- other               | -0.001<br>(-0.006,0.003)     | 0.05<br>(-0.006,0.106)      | -0.022*<br>(-0.043,-0.001) | -0.001<br>(-0.019,0.016)    | -0.001<br>(-0.003,0.001)     |
| 2019-2020 season: ACEi or ARB monotherapy             | N/A                          | N/A                         | N/A                        | N/A                         | N/A                          |
| Note: p-value for coefficients is for the null hypotl |                              |                             |                            |                             |                              |
| <b>Marginal effects/predicted probability</b>         |                              |                             |                            |                             |                              |
| <b>Other hypertension medications only</b>            |                              |                             |                            |                             |                              |
| 2017/18                                               | 0.031<br>(0.029,0.034)       | 0.312<br>(0.275,0.350)      | 0.023<br>(0.011,0.035)     | 0.009<br>(0.002,0.016)      | 0.007<br>(0.006,0.009)       |
| 2018/19                                               | 0.033<br>(0.031,0.036)       | 0.332<br>(0.296,0.368)      | 0.053<br>(0.036,0.070)     | 0.015<br>(0.006,0.024)      | 0.007<br>(0.006,0.008)       |
| 2019/20                                               | 0.063<br>(0.060,0.066)       | 0.380<br>(0.357,0.403)      | 0.053<br>(0.042,0.063)     | 0.061<br>(0.050,0.073)      | 0.014<br>(0.013,0.016)       |

### Sensitivity analysis: Dropping people with comorbidities (other than hypertension)

|                                                 | (11)                      | (12)                        | (13)                       | (14)                        | (15)                         |
|-------------------------------------------------|---------------------------|-----------------------------|----------------------------|-----------------------------|------------------------------|
|                                                 | Inpatient stay            | Inpatient stay with ICU/CCU | Inpatient stay with ARD dx | Inpatient stay with ARDS dx | Died same or following month |
| <b>ACEi or ARB plus/minus other medications</b> |                           |                             |                            |                             |                              |
| 2017/18                                         | 0.023<br>(0.022,0.025)    | 0.319<br>(0.289,0.349)      | 0.033<br>(0.021,0.044)     | 0.016<br>(0.008,0.023)      | 0.004<br>(0.003,0.004)       |
| 2018/19                                         | 0.022<br>(0.021,0.024)    | 0.343<br>(0.313,0.373)      | 0.049<br>(0.036,0.063)     | 0.023<br>(0.014,0.032)      | 0.004<br>(0.004,0.005)       |
| 2019/20                                         | 0.054<br>(0.052,0.055)    | 0.436<br>(0.418,0.454)      | 0.040<br>(0.033,0.048)     | 0.067<br>(0.058,0.076)      | 0.010<br>(0.009,0.011)       |
| <b>ACEi or ARB monotherapy</b>                  |                           |                             |                            |                             |                              |
| 2017/18                                         | N/A                       | N/A                         | N/A                        | N/A                         | N/A                          |
| 2018/19                                         | N/A                       | N/A                         | N/A                        | N/A                         | N/A                          |
| 2019/20                                         | N/A                       | N/A                         | N/A                        | N/A                         | N/A                          |
| <b>Risk ratios of marginal effects</b>          |                           |                             |                            |                             |                              |
| <b>Other hypertension medications only</b>      |                           |                             |                            |                             |                              |
| 2018/19 season vs. 2017/18                      | 1.069<br>(0.953,1.186)    | 1.064<br>(0.893,1.235)      | 2.291<br>(0.893,3.688)     | 1.633<br>(0.078,3.189)      | 0.973<br>(0.744,1.203)       |
| 2019/20 season vs. 2017/18                      | 2.008***<br>(1.823,2.193) | 1.216**<br>(1.053,1.379)    | 2.270*<br>(1.013,3.526)    | 6.718*<br>(1.473,11.963)    | 1.942***<br>(1.561,2.323)    |
| <b>ACEi or ARB plus/minus other medications</b> |                           |                             |                            |                             |                              |
| 2018/19 season vs. 2017/18                      | 0.961<br>(0.875,1.047)    | 1.076<br>(0.939,1.213)      | 1.510<br>(0.842,2.177)     | 1.432<br>(0.544,2.320)      | 1.128<br>(0.879,1.377)       |
| 2019/20 season vs. 2017/18                      | 2.291***<br>(2.124,2.458) | 1.369***<br>(1.228,1.509)   | 1.234<br>(0.754,1.713)     | 4.210**<br>(2.113,6.308)    | 2.624***<br>(2.142,3.107)    |
| <b>ACEi or ARB monotherapy</b>                  |                           |                             |                            |                             |                              |
| 2018/19 season vs. 2017/18                      | N/A                       | N/A                         | N/A                        | N/A                         | N/A                          |
| 2019/20 season vs. 2017/18                      | N/A                       | N/A                         | N/A                        | N/A                         | N/A                          |
| Number of episodes                              | 200,778                   | 7,696                       | 7,696                      | 7,696                       | 200,508                      |
| Number of people                                | 175,494                   | 7,647                       | 7,647                      | 7,647                       | 175,251                      |

Note: p-value for risk ratios is for the null hypothe

N/A: variable not included in model

\* p<0.05, \*\* p<0.01, \*\*\* p<0.001

### Sensitivity analysis: limiting analysis to strict flu season (dropping summer months)

|                                                       | (16)                         | (17)                        | (18)                        | (19)                         | (20)                         |
|-------------------------------------------------------|------------------------------|-----------------------------|-----------------------------|------------------------------|------------------------------|
|                                                       | Inpatient stay               | Inpatient stay with ICU/CCU | Inpatient stay with ARD dx  | Inpatient stay with ARDS dx  | Died same or following month |
| <b>Key coefficient estimates</b>                      |                              |                             |                             |                              |                              |
| <b>Season</b>                                         |                              |                             |                             |                              |                              |
| 2017-2018 flu season                                  | ref.                         | ref.                        | ref.                        | ref.                         | ref.                         |
| 2018-2019 flu season                                  | 0<br>(-0.004,0.003)          | 0.009<br>(-0.002,0.019)     | 0.017***<br>(0.012,0.022)   | -0.007***<br>(-0.010,-0.003) | 0<br>(-0.002,0.002)          |
| 2019-2020 flu season                                  | 0.003*<br>(0.000,0.007)      | 0.030***<br>(0.020,0.041)   | 0.017***<br>(0.011,0.022)   | 0.010***<br>(0.006,0.014)    | 0.017***<br>(0.015,0.020)    |
| <b>HTN medication group</b>                           |                              |                             |                             |                              |                              |
| Other medications only                                | ref.                         | ref.                        | ref.                        | ref.                         | ref.                         |
| ACEi or ARB plus/minus other medications              | -0.016***<br>(-0.019,-0.013) | -0.01<br>(-0.021,0.000)     | -0.007**<br>(-0.011,-0.002) | -0.003<br>(-0.006,0.001)     | -0.009***<br>(-0.010,-0.007) |
| ACEi or ARB monotherapy                               | N/A                          | N/A                         | N/A                         | N/A                          | N/A                          |
| <b>Season/medication interactions</b>                 |                              |                             |                             |                              |                              |
| 2018-2019 season: ACEi or ARB +- other                | 0.002<br>(-0.002,0.006)      | 0.01<br>(-0.004,0.025)      | 0.001<br>(-0.006,0.008)     | 0<br>(-0.005,0.004)          | 0<br>(-0.003,0.002)          |
| 2018-2019 season: ACEi or ARB monotherapy             | N/A                          | N/A                         | N/A                         | N/A                          | N/A                          |
| 2019-2020 season: ACEi or ARB +/- other               | 0.008***<br>(0.004,0.012)    | 0.012<br>(-0.003,0.026)     | 0.008*<br>(0.001,0.014)     | 0.008**<br>(0.002,0.013)     | -0.005***<br>(-0.008,-0.002) |
| 2019-2020 season: ACEi or ARB monotherapy             | N/A                          | N/A                         | N/A                         | N/A                          | N/A                          |
| Note: p-value for coefficients is for the null hypotl |                              |                             |                             |                              |                              |
| <b>Marginal effects/predicted probability</b>         |                              |                             |                             |                              |                              |
| <b>Other hypertension medications only</b>            |                              |                             |                             |                              |                              |
| 2017/18                                               | 0.175<br>(0.173,0.178)       | 0.480<br>(0.472,0.487)      | 0.053<br>(0.049,0.056)      | 0.030<br>(0.028,0.033)       | 0.061<br>(0.060,0.063)       |
| 2018/19                                               | 0.175<br>(0.172,0.177)       | 0.488<br>(0.480,0.496)      | 0.070<br>(0.066,0.074)      | 0.024<br>(0.021,0.026)       | 0.061<br>(0.060,0.063)       |
| 2019/20                                               | 0.179<br>(0.176,0.181)       | 0.510<br>(0.503,0.517)      | 0.069<br>(0.066,0.073)      | 0.041<br>(0.038,0.044)       | 0.079<br>(0.077,0.080)       |

**Sensitivity analysis: limiting analysis to strict flu season (dropping summer months)**

|                                                 | (16)                      | (17)                        | (18)                       | (19)                        | (20)                         |
|-------------------------------------------------|---------------------------|-----------------------------|----------------------------|-----------------------------|------------------------------|
|                                                 | Inpatient stay            | Inpatient stay with ICU/CCU | Inpatient stay with ARD dx | Inpatient stay with ARDS dx | Died same or following month |
| <b>ACEi or ARB plus/minus other medications</b> |                           |                             |                            |                             |                              |
| 2017/18                                         | 0.122<br>(0.120,0.123)    | 0.459<br>(0.452,0.466)      | 0.044<br>(0.041,0.047)     | 0.028<br>(0.026,0.031)      | 0.033<br>(0.032,0.033)       |
| 2018/19                                         | 0.124<br>(0.122,0.125)    | 0.478<br>(0.470,0.485)      | 0.063<br>(0.059,0.066)     | 0.021<br>(0.019,0.023)      | 0.032<br>(0.032,0.033)       |
| 2019/20                                         | 0.133<br>(0.131,0.134)    | 0.501<br>(0.494,0.508)      | 0.069<br>(0.065,0.072)     | 0.046<br>(0.044,0.049)      | 0.045<br>(0.044,0.046)       |
| <b>ACEi or ARB monotherapy</b>                  |                           |                             |                            |                             |                              |
| 2017/18                                         | N/A                       | N/A                         | N/A                        | N/A                         | N/A                          |
| 2018/19                                         | N/A                       | N/A                         | N/A                        | N/A                         | N/A                          |
| 2019/20                                         | N/A                       | N/A                         | N/A                        | N/A                         | N/A                          |
| <b>Risk ratios of marginal effects</b>          |                           |                             |                            |                             |                              |
| <b>Other hypertension medications only</b>      |                           |                             |                            |                             |                              |
| 2018/19 season vs. 2017/18                      | 0.998<br>(0.979,1.017)    | 1.018<br>(0.995,1.041)      | 1.324***<br>(1.208,1.440)  | 0.776***<br>(0.673,0.879)   | 1.002<br>(0.967,1.036)       |
| 2019/20 season vs. 2017/18                      | 1.019<br>(1.000,1.039)    | 1.064***<br>(1.041,1.087)   | 1.313***<br>(1.201,1.425)  | 1.343***<br>(1.190,1.495)   | 1.282***<br>(1.241,1.324)    |
| <b>ACEi or ARB plus/minus other medications</b> |                           |                             |                            |                             |                              |
| 2018/19 season vs. 2017/18                      | 1.017<br>(0.999,1.035)    | 1.041***<br>(1.019,1.063)   | 1.411***<br>(1.289,1.533)  | 0.750***<br>(0.655,0.846)   | 0.997<br>(0.960,1.034)       |
| 2019/20 season vs. 2017/18                      | 1.091***<br>(1.071,1.110) | 1.092***<br>(1.069,1.114)   | 1.542***<br>(1.413,1.671)  | 1.634***<br>(1.465,1.803)   | 1.380***<br>(1.331,1.428)    |
| <b>ACEi or ARB monotherapy</b>                  |                           |                             |                            |                             |                              |
| 2018/19 season vs. 2017/18                      | N/A                       | N/A                         | N/A                        | N/A                         | N/A                          |
| 2019/20 season vs. 2017/18                      | N/A                       | N/A                         | N/A                        | N/A                         | N/A                          |
| Number of episodes                              | 738,240                   | 106,917                     | 106,917                    | 106,917                     | 737,059                      |
| Number of people                                | 556,579                   | 97,383                      | 97,383                     | 97,383                      | 555,729                      |

Note: p-value for risk ratios is for the null hypothe

N/A: variable not included in model

\* p<0.05, \*\* p<0.01, \*\*\* p<0.001

**The RECORD statement – checklist of items, extended from the STROBE statement, that should be reported in observational studies using routinely collected health data.**

|                           | Item No. | STROBE items                                                                                                                                                                               | Location in manuscript where items are reported | RECORD items                                                                                                                                                                                                                                                                                                                                                                                                                                | Location in manuscript where items are reported |
|---------------------------|----------|--------------------------------------------------------------------------------------------------------------------------------------------------------------------------------------------|-------------------------------------------------|---------------------------------------------------------------------------------------------------------------------------------------------------------------------------------------------------------------------------------------------------------------------------------------------------------------------------------------------------------------------------------------------------------------------------------------------|-------------------------------------------------|
| <b>Title and abstract</b> |          |                                                                                                                                                                                            |                                                 |                                                                                                                                                                                                                                                                                                                                                                                                                                             |                                                 |
|                           | 1        | (a) Indicate the study's design with a commonly used term in the title or the abstract (b) Provide in the abstract an informative and balanced summary of what was done and what was found |                                                 | RECORD 1.1: The type of data used should be specified in the title or abstract. When possible, the name of the databases used should be included.<br><br>RECORD 1.2: If applicable, the geographic region and timeframe within which the study took place should be reported in the title or abstract.<br><br>RECORD 1.3: If linkage between databases was conducted for the study, this should be clearly stated in the title or abstract. |                                                 |
| <b>Introduction</b>       |          |                                                                                                                                                                                            |                                                 |                                                                                                                                                                                                                                                                                                                                                                                                                                             |                                                 |
| Background rationale      | 2        | Explain the scientific background and rationale for the investigation being reported                                                                                                       |                                                 |                                                                                                                                                                                                                                                                                                                                                                                                                                             |                                                 |
| Objectives                | 3        | State specific objectives, including any prespecified hypotheses                                                                                                                           |                                                 |                                                                                                                                                                                                                                                                                                                                                                                                                                             |                                                 |
| <b>Methods</b>            |          |                                                                                                                                                                                            |                                                 |                                                                                                                                                                                                                                                                                                                                                                                                                                             |                                                 |
| Study Design              | 4        | Present key elements of study design early in the paper                                                                                                                                    |                                                 |                                                                                                                                                                                                                                                                                                                                                                                                                                             |                                                 |
| Setting                   | 5        | Describe the setting, locations, and relevant dates, including periods of recruitment, exposure, follow-up, and data collection                                                            |                                                 |                                                                                                                                                                                                                                                                                                                                                                                                                                             |                                                 |
| Participants              | 6        | (a) <i>Cohort study</i> - Give the                                                                                                                                                         |                                                 | RECORD 6.1: The methods of study                                                                                                                                                                                                                                                                                                                                                                                                            |                                                 |

|                                                                                                                                                 |                              |                                                                                                                                                                                                                                                                                                                                                                                                                                                                                                                                                                                                                                                                                           |                                                                                                                                                                                      |                                                                                                                                                                                                                                                                                                                                                                                                                                                                                                                                                                                                                                                                     |  |
|-------------------------------------------------------------------------------------------------------------------------------------------------|------------------------------|-------------------------------------------------------------------------------------------------------------------------------------------------------------------------------------------------------------------------------------------------------------------------------------------------------------------------------------------------------------------------------------------------------------------------------------------------------------------------------------------------------------------------------------------------------------------------------------------------------------------------------------------------------------------------------------------|--------------------------------------------------------------------------------------------------------------------------------------------------------------------------------------|---------------------------------------------------------------------------------------------------------------------------------------------------------------------------------------------------------------------------------------------------------------------------------------------------------------------------------------------------------------------------------------------------------------------------------------------------------------------------------------------------------------------------------------------------------------------------------------------------------------------------------------------------------------------|--|
| 1<br>2<br>3<br>4<br>5<br>6<br>7<br>8<br>9<br>10<br>11<br>12<br>13<br>14<br>15<br>16<br>17<br>18<br>19<br>20<br>21<br>22<br>23<br>24<br>25<br>26 |                              | <p>eligibility criteria, and the sources and methods of selection of participants. Describe methods of follow-up</p> <p><i>Case-control study</i> - Give the eligibility criteria, and the sources and methods of case ascertainment and control selection. Give the rationale for the choice of cases and controls</p> <p><i>Cross-sectional study</i> - Give the eligibility criteria, and the sources and methods of selection of participants</p> <p><i>(b) Cohort study</i> - For matched studies, give matching criteria and number of exposed and unexposed</p> <p><i>Case-control study</i> - For matched studies, give matching criteria and the number of controls per case</p> |                                                                                                                                                                                      | <p>population selection (such as codes or algorithms used to identify subjects) should be listed in detail. If this is not possible, an explanation should be provided.</p> <p>RECORD 6.2: Any validation studies of the codes or algorithms used to select the population should be referenced. If validation was conducted for this study and not published elsewhere, detailed methods and results should be provided.</p> <p>RECORD 6.3: If the study involved linkage of databases, consider use of a flow diagram or other graphical display to demonstrate the data linkage process, including the number of individuals with linked data at each stage.</p> |  |
| 27<br>28<br>29<br>30<br>31<br>32<br>33                                                                                                          | Variables                    | 7                                                                                                                                                                                                                                                                                                                                                                                                                                                                                                                                                                                                                                                                                         | Clearly define all outcomes, exposures, predictors, potential confounders, and effect modifiers. Give diagnostic criteria, if applicable.                                            | RECORD 7.1: A complete list of codes and algorithms used to classify exposures, outcomes, confounders, and effect modifiers should be provided. If these cannot be reported, an explanation should be provided.                                                                                                                                                                                                                                                                                                                                                                                                                                                     |  |
| 34<br>35<br>36<br>37<br>38<br>39<br>40<br>41                                                                                                    | Data sources/<br>measurement | 8                                                                                                                                                                                                                                                                                                                                                                                                                                                                                                                                                                                                                                                                                         | For each variable of interest, give sources of data and details of methods of assessment (measurement). Describe comparability of assessment methods if there is more than one group |                                                                                                                                                                                                                                                                                                                                                                                                                                                                                                                                                                                                                                                                     |  |
| 42<br>43<br>44                                                                                                                                  | Bias                         | 9                                                                                                                                                                                                                                                                                                                                                                                                                                                                                                                                                                                                                                                                                         | Describe any efforts to address potential sources of bias                                                                                                                            |                                                                                                                                                                                                                                                                                                                                                                                                                                                                                                                                                                                                                                                                     |  |

45  
46  
47



|                                                                                                                                                  |                                  |    |                                                                                                                                                                                                                                                                                                                                                                                                                                                                                                                                                                      |                                                                                                                                                                                                                                                              |  |
|--------------------------------------------------------------------------------------------------------------------------------------------------|----------------------------------|----|----------------------------------------------------------------------------------------------------------------------------------------------------------------------------------------------------------------------------------------------------------------------------------------------------------------------------------------------------------------------------------------------------------------------------------------------------------------------------------------------------------------------------------------------------------------------|--------------------------------------------------------------------------------------------------------------------------------------------------------------------------------------------------------------------------------------------------------------|--|
| 1<br>2                                                                                                                                           | Study size                       | 10 | Explain how the study size was arrived at                                                                                                                                                                                                                                                                                                                                                                                                                                                                                                                            |                                                                                                                                                                                                                                                              |  |
| 3<br>4<br>5<br>6<br>7                                                                                                                            | Quantitative variables           | 11 | Explain how quantitative variables were handled in the analyses. If applicable, describe which groupings were chosen, and why                                                                                                                                                                                                                                                                                                                                                                                                                                        |                                                                                                                                                                                                                                                              |  |
| 8<br>9<br>10<br>11<br>12<br>13<br>14<br>15<br>16<br>17<br>18<br>19<br>20<br>21<br>22<br>23<br>24<br>25<br>26<br>27<br>28<br>29<br>30<br>31<br>32 | Statistical methods              | 12 | (a) Describe all statistical methods, including those used to control for confounding<br>(b) Describe any methods used to examine subgroups and interactions<br>(c) Explain how missing data were addressed<br>(d) <i>Cohort study</i> - If applicable, explain how loss to follow-up was addressed<br><i>Case-control study</i> - If applicable, explain how matching of cases and controls was addressed<br><i>Cross-sectional study</i> - If applicable, describe analytical methods taking account of sampling strategy<br>(e) Describe any sensitivity analyses |                                                                                                                                                                                                                                                              |  |
| 33<br>34<br>35<br>36<br>37<br>38<br>39<br>40<br>41<br>42                                                                                         | Data access and cleaning methods |    | ..                                                                                                                                                                                                                                                                                                                                                                                                                                                                                                                                                                   | RECORD 12.1: Authors should describe the extent to which the investigators had access to the database population used to create the study population.<br><br>RECORD 12.2: Authors should provide information on the data cleaning methods used in the study. |  |
| 43<br>44<br>45<br>46<br>47                                                                                                                       | Linkage                          |    | ..                                                                                                                                                                                                                                                                                                                                                                                                                                                                                                                                                                   | RECORD 12.3: State whether the                                                                                                                                                                                                                               |  |

|                  |    |                                                                                                                                                                                                                                                                                                                                                 |  |                                                                                                                                                                                                                                                                                                                    |  |
|------------------|----|-------------------------------------------------------------------------------------------------------------------------------------------------------------------------------------------------------------------------------------------------------------------------------------------------------------------------------------------------|--|--------------------------------------------------------------------------------------------------------------------------------------------------------------------------------------------------------------------------------------------------------------------------------------------------------------------|--|
|                  |    |                                                                                                                                                                                                                                                                                                                                                 |  | study included person-level, institutional-level, or other data linkage across two or more databases. The methods of linkage and methods of linkage quality evaluation should be provided.                                                                                                                         |  |
| <b>Results</b>   |    |                                                                                                                                                                                                                                                                                                                                                 |  |                                                                                                                                                                                                                                                                                                                    |  |
| Participants     | 13 | (a) Report the numbers of individuals at each stage of the study ( <i>e.g.</i> , numbers potentially eligible, examined for eligibility, confirmed eligible, included in the study, completing follow-up, and analysed)<br>(b) Give reasons for non-participation at each stage.<br>(c) Consider use of a flow diagram                          |  | RECORD 13.1: Describe in detail the selection of the persons included in the study ( <i>i.e.</i> , study population selection) including filtering based on data quality, data availability and linkage. The selection of included persons can be described in the text and/or by means of the study flow diagram. |  |
| Descriptive data | 14 | (a) Give characteristics of study participants ( <i>e.g.</i> , demographic, clinical, social) and information on exposures and potential confounders<br>(b) Indicate the number of participants with missing data for each variable of interest<br>(c) <i>Cohort study</i> - summarise follow-up time ( <i>e.g.</i> , average and total amount) |  |                                                                                                                                                                                                                                                                                                                    |  |
| Outcome data     | 15 | <i>Cohort study</i> - Report numbers of outcome events or summary measures over time<br><i>Case-control study</i> - Report numbers in each exposure category, or summary measures of exposure<br><i>Cross-sectional study</i> - Report numbers of outcome events or                                                                             |  |                                                                                                                                                                                                                                                                                                                    |  |

|                                                                                           |                |                  |                                                                                                                                                                                                                                                                                                                                                                                                                 |                                                                                                                                                                                                                                                                                                          |  |
|-------------------------------------------------------------------------------------------|----------------|------------------|-----------------------------------------------------------------------------------------------------------------------------------------------------------------------------------------------------------------------------------------------------------------------------------------------------------------------------------------------------------------------------------------------------------------|----------------------------------------------------------------------------------------------------------------------------------------------------------------------------------------------------------------------------------------------------------------------------------------------------------|--|
|                                                                                           |                | summary measures |                                                                                                                                                                                                                                                                                                                                                                                                                 |                                                                                                                                                                                                                                                                                                          |  |
| 1<br>2<br>3<br>4<br>5<br>6<br>7<br>8<br>9<br>10<br>11<br>12<br>13<br>14<br>15<br>16<br>17 | Main results   | 16               | (a) Give unadjusted estimates and, if applicable, confounder-adjusted estimates and their precision (e.g., 95% confidence interval). Make clear which confounders were adjusted for and why they were included<br>(b) Report category boundaries when continuous variables were categorized<br>(c) If relevant, consider translating estimates of relative risk into absolute risk for a meaningful time period |                                                                                                                                                                                                                                                                                                          |  |
| 18<br>19<br>20<br>21                                                                      | Other analyses | 17               | Report other analyses done—e.g., analyses of subgroups and interactions, and sensitivity analyses                                                                                                                                                                                                                                                                                                               |                                                                                                                                                                                                                                                                                                          |  |
| <b>Discussion</b>                                                                         |                |                  |                                                                                                                                                                                                                                                                                                                                                                                                                 |                                                                                                                                                                                                                                                                                                          |  |
| 23<br>24<br>25                                                                            | Key results    | 18               | Summarise key results with reference to study objectives                                                                                                                                                                                                                                                                                                                                                        |                                                                                                                                                                                                                                                                                                          |  |
| 26<br>27<br>28<br>29<br>30<br>31<br>32<br>33<br>34<br>35                                  | Limitations    | 19               | Discuss limitations of the study, taking into account sources of potential bias or imprecision. Discuss both direction and magnitude of any potential bias                                                                                                                                                                                                                                                      | RECORD 19.1: Discuss the implications of using data that were not created or collected to answer the specific research question(s). Include discussion of misclassification bias, unmeasured confounding, missing data, and changing eligibility over time, as they pertain to the study being reported. |  |
| 36<br>37<br>38<br>39<br>40<br>41<br>42<br>43<br>44                                        | Interpretation | 20               | Give a cautious overall interpretation of results considering objectives, limitations, multiplicity of analyses, results from similar studies, and other relevant evidence                                                                                                                                                                                                                                      |                                                                                                                                                                                                                                                                                                          |  |

|                                        |                                                           |    |                                                                                                                                                               |                                                                                                                                                          |  |
|----------------------------------------|-----------------------------------------------------------|----|---------------------------------------------------------------------------------------------------------------------------------------------------------------|----------------------------------------------------------------------------------------------------------------------------------------------------------|--|
| 1<br>2<br>3                            | Generalisability                                          | 21 | Discuss the generalisability (external validity) of the study results                                                                                         |                                                                                                                                                          |  |
| 4                                      | <b>Other Information</b>                                  |    |                                                                                                                                                               |                                                                                                                                                          |  |
| 5<br>6<br>7<br>8<br>9                  | Funding                                                   | 22 | Give the source of funding and the role of the funders for the present study and, if applicable, for the original study on which the present article is based |                                                                                                                                                          |  |
| 10<br>11<br>12<br>13<br>14<br>15<br>16 | Accessibility of protocol, raw data, and programming code |    | ..                                                                                                                                                            | RECORD 22.1: Authors should provide information on how to access any supplemental information such as the study protocol, raw data, or programming code. |  |

17  
18 \*Reference: Benchimol EI, Smeeth L, Guttman A, Harron K, Moher D, Petersen I, Sørensen HT, von Elm E, Langan SM, the RECORD Working  
19 Committee. The REporting of studies Conducted using Observational Routinely-collected health Data (RECORD) Statement. *PLoS Medicine* 2015;  
20 in press.

21  
22 \*Checklist is protected under Creative Commons Attribution ([CC BY](https://creativecommons.org/licenses/by/4.0/)) license.  
23  
24  
25  
26  
27  
28  
29  
30  
31  
32  
33  
34  
35  
36  
37  
38  
39  
40  
41  
42  
43  
44

# BMJ Open

## Association of outpatient use of renin-angiotensin-aldosterone system blockers on outcomes of acute respiratory illness during the COVID-19 pandemic: a cohort study

|                                 |                                                                                                                                                                                                                                                                                                                                                                                                                                                                                                                                                                                                                                                                                                                                              |
|---------------------------------|----------------------------------------------------------------------------------------------------------------------------------------------------------------------------------------------------------------------------------------------------------------------------------------------------------------------------------------------------------------------------------------------------------------------------------------------------------------------------------------------------------------------------------------------------------------------------------------------------------------------------------------------------------------------------------------------------------------------------------------------|
| Journal:                        | <i>BMJ Open</i>                                                                                                                                                                                                                                                                                                                                                                                                                                                                                                                                                                                                                                                                                                                              |
| Manuscript ID                   | bmjopen-2021-060305.R1                                                                                                                                                                                                                                                                                                                                                                                                                                                                                                                                                                                                                                                                                                                       |
| Article Type:                   | Original research                                                                                                                                                                                                                                                                                                                                                                                                                                                                                                                                                                                                                                                                                                                            |
| Date Submitted by the Author:   | 15-Apr-2022                                                                                                                                                                                                                                                                                                                                                                                                                                                                                                                                                                                                                                                                                                                                  |
| Complete List of Authors:       | Jeffery, Molly; Mayo Clinic, Department of Emergency Medicine; OptumLabs, Visiting Fellow<br>Oliveira J. e Silva, Lucas; Mayo Clinic, Emergency Medicine<br>Bellolio, Fernanda; Mayo Clinic, Emergency Medicine<br>Garovic, Vesna D.; Mayo Clinic, Department of Medicine, Division of Nephrology & Hypertension<br>Dempsey, Timothy; US Air Force; Mayo Clinic, Robert D. and Patricia E. Kern Center for the Science of Health Care Delivery<br>Limper, Andrew; Mayo Clinic, Department of Medicine, Division of Pulmonary and Critical Care Medicine; Mayo Clinic, Robert D. and Patricia E. Kern Center for the Science of Health Care Delivery<br>Cummins, Nathan; Mayo Clinic, Department of Medicine, Division of Infectious Diseases |
| <b>Primary Subject Heading</b>: | Infectious diseases                                                                                                                                                                                                                                                                                                                                                                                                                                                                                                                                                                                                                                                                                                                          |
| Secondary Subject Heading:      | Infectious diseases, Epidemiology, Cardiovascular medicine                                                                                                                                                                                                                                                                                                                                                                                                                                                                                                                                                                                                                                                                                   |
| Keywords:                       | COVID-19, INFECTIOUS DISEASES, Hypertension < CARDIOLOGY                                                                                                                                                                                                                                                                                                                                                                                                                                                                                                                                                                                                                                                                                     |
|                                 |                                                                                                                                                                                                                                                                                                                                                                                                                                                                                                                                                                                                                                                                                                                                              |

SCHOLARONE™  
Manuscripts



I, the Submitting Author has the right to grant and does grant on behalf of all authors of the Work (as defined in the below author licence), an exclusive licence and/or a non-exclusive licence for contributions from authors who are: i) UK Crown employees; ii) where BMJ has agreed a CC-BY licence shall apply, and/or iii) in accordance with the terms applicable for US Federal Government officers or employees acting as part of their official duties; on a worldwide, perpetual, irrevocable, royalty-free basis to BMJ Publishing Group Ltd ("BMJ") its licensees and where the relevant Journal is co-owned by BMJ to the co-owners of the Journal, to publish the Work in this journal and any other BMJ products and to exploit all rights, as set out in our [licence](#).

The Submitting Author accepts and understands that any supply made under these terms is made by BMJ to the Submitting Author unless you are acting as an employee on behalf of your employer or a postgraduate student of an affiliated institution which is paying any applicable article publishing charge ("APC") for Open Access articles. Where the Submitting Author wishes to make the Work available on an Open Access basis (and intends to pay the relevant APC), the terms of reuse of such Open Access shall be governed by a Creative Commons licence – details of these licences and which [Creative Commons](#) licence will apply to this Work are set out in our licence referred to above.

Other than as permitted in any relevant BMJ Author's Self Archiving Policies, I confirm this Work has not been accepted for publication elsewhere, is not being considered for publication elsewhere and does not duplicate material already published. I confirm all authors consent to publication of this Work and authorise the granting of this licence.

1  
2  
3 **Title:** Association of outpatient use of renin-angiotensin-aldosterone system blockers on  
4  
5 outcomes of acute respiratory illness during the COVID-19 pandemic: a cohort study  
6  
7  
8

9  
10 **Authors**

11 Molly M. Jeffery,<sup>1,2,3</sup> PhD; Lucas Oliveira J. e Silva,<sup>1</sup> MD, MS; Fernanda Bellolio,<sup>1,2</sup> MD, MS;  
12  
13 Vesna D. Garovic<sup>4</sup>, MD, PhD; Timothy M. Dempsey<sup>5,6</sup>, MD; Andrew H. Limper<sup>5,7</sup>, MD; Nathan  
14  
15 W. Cummins,<sup>8</sup> MD.  
16  
17  
18

19  
20  
21 **Authors Affiliations**

22  
23  
24 <sup>1</sup>Department of Emergency Medicine, Mayo Clinic, Rochester, Minnesota, USA.

25  
26 <sup>2</sup>Division of Health Care Delivery Research, Mayo Clinic, Rochester, Minnesota, USA.

27  
28 <sup>3</sup> OptumLabs Visiting Fellow, Eden Prairie, Minnesota, USA

29  
30  
31 <sup>4</sup>Department of Medicine, Division of Nephrology & Hypertension, Mayo Clinic, Rochester,  
32  
33 Minnesota, USA.

34  
35 <sup>5</sup>Robert D. and Patricia E. Kern Center for the Science of Health Care Delivery, Mayo Clinic,  
36  
37 Rochester, Minnesota, USA.

38  
39  
40 <sup>6</sup>David Grant Medical Center, US Air Force, Travis AFB, CA 94535

41  
42  
43 <sup>7</sup>Department of Medicine, Division of Pulmonary and Critical Care Medicine, Mayo Clinic,  
44  
45 Rochester, MN, USA

46  
47 <sup>8</sup>Department of Medicine, Division of Infectious Diseases, Mayo Clinic, Rochester, MN, USA.  
48  
49

50  
51 **Corresponding author**

52  
53 Molly Moore Jeffery, PhD  
54  
55  
56  
57  
58  
59  
60

Assistant Professor of Emergency Medicine and Health Services Research

Mayo Clinic Rochester

200 First Street SW, Rochester, MN, 55905

Email: jeffery.molly@mayo.edu

Phone: 507-293-2508

### **Author Contributions**

Conceptualization: MMJ, LOJS, FB, VDG, TMD, AHL, NWC. Formal analysis: MMJ.

Investigation: MMJ, LOJS, FB, VDG, TMD, AHL, NWC. Methodology: MMJ, LOJS, FB.

Project administration: MMJ. Supervision: MMJ, NWC. Validation: MMJ, NWC. Writing-

original draft: MMJ. Writing-review and editing: MMJ, LOJS, FB, VSD, TMD, AHL, NWC.

Guarantor: MMJ, NWC. All authors provided critical revision and contribution for important intellectual content.

### **Funding**

This research made possible in part by the Mayo Clinic Robert D. and Patricia E. Kern Center for the Science of Health Care Delivery.

### **Competing interests**

None.

### **Patient consent for publication**

Not applicable / Not required.



1  
2  
3  
4  
5 **Word count**  
6

7  
8 3,048 words  
9  
10  
11  
12  
13  
14  
15  
16  
17  
18  
19  
20  
21  
22  
23  
24  
25  
26  
27  
28  
29  
30  
31  
32  
33  
34  
35  
36  
37  
38  
39  
40  
41  
42  
43  
44  
45  
46  
47  
48  
49  
50  
51  
52  
53  
54  
55  
56  
57  
58  
59  
60

For peer review only

## ABSTRACT

**Objectives:** Evaluate the associations between patients taking ACE inhibitors (ACEis) and angiotensin receptor blockers (ARBs) and their clinical outcomes after an acute viral respiratory illness (AVRI) due to COVID-19.

**Design:** Retrospective cohort.

**Setting:** The USA; 2017-2018 influenza season, 2018-2019 influenza season, and 2019-2020 influenza/COVID-19 season.

**Participants:** People with hypertension (HTN) taking an ACEi, ARB or other HTN medications, and experiencing AVRI.

**Main outcome measures:** Change in hospital admission, intensive care unit (ICU) or coronary care unit (CCU), acute respiratory distress (ARD), ARD syndrome (ARDS), and all-cause mortality, comparing COVID-19 to pre-COVID-19 influenza seasons.

**Results:** The cohort included 1,059,474 episodes of AVRI (653,797 filled an ACEi or ARB, and 405,677 other HTN medications). 58.6% were women and 72.9% with age  $\geq 65$ . The ACEi/ARB cohort saw a larger increase in risk in the COVID-19 influenza season than the other HTN medication cohort for four out of five outcomes, with an additional 1.5 percentage point (pp) increase in risk of an inpatient stay (95% CI 1.2 to 1.9 pp) and of ICU/CCU use (95% CI 0.3 to 2.7 pp), as well as a 0.7 pp (0.1 to 1.2 pp) additional increase in risk of ARD and 0.9 pp (0.4 to 1.3 pp) additional increase in risk of ARDS. There was no statistically significant difference in the absolute risk of death (-0.2 pp, 95% CI -0.4 to 0.1 pp). However, the relative risk of death in 2019/2020 vs. 2017/2018 for the ACEi/ARB group was larger (1.40 [1.36 to 1.44]) than for the other HTN medication cohort (1.24 [1.21 to 1.28]).

1  
2  
3 **Conclusions:** People with AVRI using ACEi/ARBs for hypertension had a greater increase in  
4  
5 poor outcomes during the COVID-19 pandemic than those using other medications to treat  
6  
7 hypertension. The small absolute magnitude of the differences likely does not support changes in  
8  
9 clinical practice.  
10  
11

12 Keywords: ACE inhibitors, angiotensin receptor blockers, COVID-19, acute viral respiratory  
13  
14 illness.  
15  
16  
17  
18  
19  
20  
21  
22  
23  
24  
25  
26  
27  
28  
29  
30  
31  
32  
33  
34  
35  
36  
37  
38  
39  
40  
41  
42  
43  
44  
45  
46  
47  
48  
49  
50  
51  
52  
53  
54  
55  
56  
57  
58  
59  
60

## ARTICLE SUMMARY

### Strengths and limitations of this study

- It uses an approach of difference-in-differences that mitigates some of the limitations of observational studies.
- The cohort includes a diverse sample of US residents including people with commercial insurance and Medicare Advantage.
- The cohort is not representative of people without insurance or people with Medicaid or other insurance types.
- Given the observational design, it is not possible to make causal claims.

## INTRODUCTION

The renin-angiotensin-aldosterone system (RAAS) is a hormone system responsible for several physiologic functions including vascular resistance, electrolyte homeostasis, and fluid balance. Medications such as angiotensin-converting enzyme inhibitors (ACEi) and angiotensin-receptor blockers (ARBs) interrupt different steps in this system and are commonly used in clinical practice for outpatient blood pressure or heart failure management. Early in the coronavirus disease 2019 (COVID-19) pandemic, pre-clinical studies raised concerns about the association between use of ACEi or ARBs and severe illness in hypertensive patients with COVID-19.<sup>1</sup> Angiotensin-converting-enzyme 2 (ACE-2) is the binding site for respiratory viruses including the severe acute respiratory syndrome coronavirus 2 (SARS-CoV-2), and two opposing theories on the potential effects of these medications have been debated: one postulating an increased susceptibility to SARS-CoV-2 through upregulation of ACE-2 receptors, and one postulating a protection against severe disease through suppression of angiotensin II and subsequent prevention of virus-mediated acute lung injury.<sup>1</sup>

Since the hypothesis that the prior use of RAAS inhibitors could be associated with worse clinical outcomes in hypertensive patients diagnosed with COVID-19 was raised, several clinical studies were published.<sup>2</sup> In the latest update of a living systematic review addressing this question by Mackey and colleagues, the authors reported high confidence based on 78 studies (77 observational studies, 1 randomized controlled trial [RCTs]) in the finding that ACEi/ARB use is not associated with COVID-19 severity.<sup>2</sup> Another 21 systematic reviews and/or meta-analyses have been consistent with this conclusion as well.<sup>3-23</sup> Furthermore, two recently published RCTs do not support the discontinuation of these drugs in hypertensive patients admitted to the hospital with COVID-19.<sup>24 25</sup>

1  
2  
3 Most existing studies, however, are of relatively small sample size with low  
4  
5 methodological quality. The RCTs addressing discontinuation of ACEi/ARBs in people  
6  
7 hospitalized with COVID-19, while reassuring for clinicians and patients, do not directly address  
8  
9 the question of whether the risk of hospitalization may be increased in this population. In this  
10  
11 study, we aimed to evaluate the associations between prescription fills for ACEis and ARBs and  
12  
13 clinical outcomes with an acute viral respiratory illness (AVRI) due to COVID-19. We use a  
14  
15 difference-in-differences approach comparing the COVID-19 period to prior AVRI seasons and  
16  
17 comparing users of ACEis or ARBs vs. other HTN medications in order to control for otherwise  
18  
19 unobserved differences in underlying health and healthcare seeking behavior between the  
20  
21 medication cohorts. We assessed severity of illness and mortality in AVRI across cohorts of  
22  
23 patients with hypertension (HTN) using ACEis, ARBs, and other HTN medications, and we  
24  
25 compared the differential effects of these medications on outcomes of AVRI in the 2017/2018  
26  
27 and 2018/2019 influenza seasons to those in the 2019/2020 influenza/COVID-19 season in the  
28  
29 United States.  
30  
31  
32  
33  
34  
35

## 36 **METHODS**

37  
38 We adhered to the RECORD statement (REporting of studies Conducted using  
39  
40 Observational Routinely collected health Data).<sup>26</sup>  
41  
42  
43  
44

### 45 **Data source and study setting**

46  
47 We used de-identified administrative claims data from the OptumLabs<sup>®</sup> Data Warehouse  
48  
49 (OLDW) to identify episodes of AVRI in people with Medicare Advantage or commercial health  
50  
51 insurance in the United States. The OLDW includes medical and pharmacy claims, laboratory  
52  
53 results, and enrollment records for commercial and Medicare Advantage enrollees.<sup>27</sup> The  
54  
55  
56  
57  
58  
59  
60

1  
2  
3 database contains longitudinal health information on enrollees and patients, representing a  
4  
5 diverse mixture of ages, ethnicities, and geographical regions across the United States. This  
6  
7 study was deemed exempt by the Institutional Review Board.  
8  
9  
10

## 11 12 **Study design and participants**

13  
14 We created a cohort of patients with one or more episodes of AVRI with an initial date of  
15 service (index date) between October 1, 2017, and November 30, 2020. AVRI was defined  
16 using ICD-10 diagnosis codes for viral causes of respiratory illness: bronchitis, pneumonia,  
17 influenza, influenza like illness, and lower respiratory infections. (**Supplementary Material S1**).  
18  
19 Each episode of AVRI started on the first date on which the patient had a claim with an AVRI  
20 diagnosis code and continued until the patient experienced a 30-day span with no AVRI  
21 diagnoses.  
22  
23  
24  
25  
26  
27  
28  
29

30  
31 We required 180 days of continuous insurance enrollment before the index date of the  
32 AVRI episode. Insurance claims during this period were used to identify hypertension  
33 diagnoses, as well as other comorbidities that could be associated with COVID-19 morbidity and  
34 mortality risk or with the choice of medications to treat hypertension, as explained below.  
35  
36  
37  
38  
39  
40  
41

## 42 **Variables and measurements**

43  
44 Patient age, sex, residence state, and insurance enrollments dates and coverage type  
45 (commercial vs. Medicare Advantage) were taken from insurance enrollment data.  
46  
47  
48  
49  
50

### 51 *Hypertension and comorbidities*

1  
2  
3 Hypertension and most comorbidities were defined based on the Quan enhanced  
4 Elixhauser comorbidity ICD-10 codes;<sup>28</sup> codes used to define comorbidities not included in the  
5 Elixhauser index (coronary artery disease, stroke, deep vein thrombosis, and pulmonary  
6 embolism) are available in the **Supplementary Material S1**. Hypertension and diabetes were  
7 coded hierarchically such that people with both complicated and uncomplicated disease were  
8 coded as complicated. All comorbidities required at least one inpatient or two outpatient  
9 diagnoses on different dates of service in the 6 months before the index date. Inpatient and  
10 outpatient settings were defined using procedure and revenue codes using code lists developed  
11 for use with Healthcare Effectiveness Data and Information Set (HEDIS) performance  
12 measures.<sup>29</sup>

### 23 24 25 26 27 28 *Hypertension medications*

29  
30 We developed a comprehensive list of hypertension medications (see **Supplementary**  
31 **Material S1**), then identified all National Drug Codes (NDCs) for these medications in a table  
32 that is part of the OLDW. We searched for prescription fills in the 90 days before the index date  
33 for each episode of AVRI and categorized fill patterns as ACEi or ARB only, ACEi or ARB with  
34 other (i.e., not ACEi or ARB) hypertension medications, other hypertension medications only, or  
35 no hypertension medications. In primary analyses, ACEi or ARB users with and without other  
36 hypertension medications were combined and compared with people using only other  
37 hypertension medications; information on people who did not use hypertension medications is  
38 provided in summary tables for reference, but they were excluded from the analyses. A small  
39 number of people who filled both an ACEi and an ARB were also excluded from the analysis  
40 (N=10,933).



## Outcomes

We specified 5 outcomes associated with more serious cases of AVRI: death, hospitalization, and, conditional on hospitalization: intensive care unit (ICU) or coronary care unit (CCU) services (revenue codes 0200 to 0219), a diagnosis of acute respiratory distress (ARD) (ICD-10 diagnosis code R06.03), and a diagnosis of acute respiratory distress syndrome (ARDS) (ICD-10 diagnosis code J80).

Data on death in OLDW includes only the month and year of death to maintain deidentification. It is sourced from the Death Master File, claims information, and insurance enrollment information. The mortality outcome in this study assessed whether the person was reported to have died in the same month as the index date or in the following month.

## Data analysis

We used a difference-in-differences approach to assess the association between use of ACEis or ARBs and poor outcomes from COVID-19. The comparison group is people with hypertension using hypertension medications other than ACEis or ARBs; the exposure of interest is the COVID-19 pandemic. We compared outcomes of AVRI in the 2017/2018 and 2018/2019 influenza seasons to those in the 2019/2020 influenza/COVID-19 season. The premise is that the design will control for both differences in underlying health between the two medication groups (by comparing each to people taking those same medications in the years before COVID-19) and differences in healthcare service use during COVID-19 that are common to all people with hypertension. The inclusion of two pre-COVID-19 influenza seasons allows for a comparison of differences in outcomes between the medication groups due to changes in overall AVRI illness

1  
2  
3 mix unrelated to COVID-19. Cases, inpatient admission rates, and mortality rates can vary  
4  
5 substantially with different influenza strains.<sup>30</sup>  
6

7  
8 We used a linear probability approach to model each of the five outcomes, in 3 time  
9  
10 periods (2017/2018, 2018/2019, and 2019/2020 seasons) for two patient medication groups  
11  
12 (people using ACEis or ARBs vs. those using other HTN medications). Regression models  
13  
14 included patient sex, age (categorical), insurance type (Medicare Advantage vs. commercial),  
15  
16 Census region of residence, race/ethnicity, and flags for comorbidities described above. Huber-  
17  
18 White standard errors were specified to adjust for repeated observations of some patients across  
19  
20 separate episodes of AVRI. The model is specified such that the coefficient on the interaction  
21  
22 between the 2019/2020 influenza/COVID-19 season and the ACEi/ARB group provides a  
23  
24 statistical test for whether the ACEi/ARB group was differently affected by COVID-19 than the  
25  
26 other HTN medication cohort. A coefficient greater than 0 indicates the ACEi/ARB group had a  
27  
28 larger absolute increase in risk of the outcome than the other HTN medication cohort.  
29  
30  
31

32  
33 A linear probability model provides estimates of absolute risk differences rather than  
34  
35 relative changes in risk. As a result, the differences are not scaled to the baseline probability of  
36  
37 the event: a one percentage point risk difference may have different importance for an event with  
38  
39 an incidence of 10% (relative increase 10%) compared to one with an incidence of 1% (relative  
40  
41 increase 100%). To ease interpretation of results, we calculated average marginal effects for  
42  
43 each flu season over the medication groups (in other words, the adjusted probabilities were  
44  
45 calculated keeping the actual medication group rather than changing the medication group of  
46  
47 each individual). We calculated ratios of these adjusted probabilities in the 2018/2019 flu season  
48  
49 and the 2019/2020/COVID-19 flu season versus the baseline 2017/2018 flu season, along with p-  
50  
51 values for the hypothesis test that the ratios were equal to 1 (i.e., the baseline year and the later  
52  
53  
54  
55  
56  
57  
58  
59  
60

1  
2  
3 year had no difference in outcome risk for that medication group). These ratios provide the  
4  
5 percentage relative increase in the outcome risk.  
6  
7

### 8 9 10 *Model result interpretation*

11  
12 If the presence of COVID-19 affects the ACEi/ARB group more than the other HTN  
13 medication group, we would expect to see a positive and statistically significant coefficient for  
14 the interaction term ACEi/ARB by season=2019/2020. We would place more credence in the  
15 COVID-19 season findings if we find that outcomes in the 2018/2019 season did not differ much  
16 from those in the 2017/18 season, which would suggest that COVID-19 is fundamentally  
17 different from the general year-to-year shifts in flu strain. This would be supported by finding 1)  
18 a smaller coefficient for season=2018/2019 than for season=2019/2020, and 2) a smaller  
19 coefficient for the interaction term ACEi/ARB by season=2018/2019 than for the interaction  
20 term ACEi/ARB by season=2019/2020. Stata/MP version 16.0 was used for all analyses  
21 (StataCorp College Station, TX, 2019). The first author (MMJ) conducted all analyses and had  
22 access to all study data; all other authors had access to summary data and complete analysis  
23 results. No additional data available.  
24  
25  
26  
27  
28  
29  
30  
31  
32  
33  
34  
35  
36  
37  
38  
39  
40  
41

### 42 **Patient and public involvement**

43  
44 Patients and/or public were not involved in this study.  
45  
46  
47  
48

### 49 **RESULTS**

50  
51 We identified 1,247,393 episodes of AVRI in the study period among people with  
52 hypertension. Of these, 15.1% (187,919) did not fill a hypertension medication in the 90 days  
53  
54  
55  
56  
57  
58  
59  
60

1  
2  
3 before the index date and were excluded from further analysis. Of the remaining 1,059,474,  
4  
5 61.7% (653,797) filled at least one ACEi or ARB, and 38.3% (405,677) filled no ACEi or ARBs  
6  
7 (**Table 1**). Most episodes were in female patients (58.6%; n=620,810) and in older patients, with  
8  
9 72.9% of AVRI episodes in people aged 65 and older (n=772,210). The most common  
10  
11 comorbidities were chronic pulmonary diseases (35.2%; n=372,735), cardiac arrhythmias  
12  
13 (27.2%, n=288,478), coronary artery disease (26.3%; n=279,098), diabetes with complications  
14  
15 (25.6%; n=271,700), and congestive heart failure (24.0%; n=254,773).  
16  
17  
18

19  
20 Compared to AVRI episodes in those using other HTN medications, AVRI episodes in  
21  
22 people using ACEi or ARB were more frequently identified in those with Commercial insurance  
23  
24 (vs. Medicare Advantage), uncomplicated diabetes, and Hispanic ethnicity, among other patient  
25  
26 characteristics (**Table 1**). AVRI episodes in people using ACEi/ARB were less likely to be  
27  
28 associated with the oldest age group and with most comorbidities, including complicated  
29  
30 hypertension, congestive heart failure, kidney failure, liver failure, cancer, arrhythmia,  
31  
32 coagulopathy, deep vein thrombosis or pulmonary embolism, stroke, and valvular disease,  
33  
34 among other patient characteristics compared to AVRI episodes in people using other HTN  
35  
36 medications. (**Table 1**)  
37  
38  
39  
40  
41  
42  
43

#### 44 Unadjusted outcome rates

45 Across all study years, 15.8% of AVRI episodes included an inpatient stay (n=167,330),  
46  
47 including 14.0% of episodes in ACEi/ARB users (n=91,660) and 18.7% in other HTN  
48  
49 medication users (n=75,670; **Table 1**). Episode mortality rates were 5.2% overall (n=55,164),  
50  
51 4.0% for ACEi/ARB users (n=26,411), and 7.1% in other HTN medication users (n=28,753).  
52  
53  
54 About half of inpatient stays included ICU or CCU use.  
55  
56  
57  
58  
59  
60

## Primary analysis

**Table 2** presents key model results and marginal effects and ratios for season and medication cohort effects for all five outcomes. Complete regression results are available in **Supplementary Material S2**. The ACEi/ARB cohort had a somewhat lower risk of three of the five outcomes in the baseline 2017-2018 flu season compared to the other HTN medication cohort, with a 1.9 percentage point (pp) (95% CI -2.2 to -1.6 percentage points) lower risk of an inpatient stay, a 0.9 pp lower risk of death (95% CI -1.1 to -0.8 pp), and a 0.7 pp (95% CI -1.1 to -0.2 pp) lower risk of an ARD diagnosis conditional on having an inpatient stay. The point estimates for the risk differences of ICU/CCU use or an ARDS diagnosis in an inpatient stay also showed a lower risk for the ACEi/ARB cohort, but this difference was not statistically significant. The COVID-19 flu season was associated with a higher risk of all five outcomes in both the ACEi/ARB and the other HTN medication cohorts. Risk differences ranged from 1.3 pp higher risk of an ARD (95% CI: 0.8 to 1.7 pp) or ARDS (95% CI: 0.9 to 1.6 pp) diagnosis in an inpatient stay to a 3.5 pp (2.6 to 4.4 pp) higher risk of ICU/CCU use in an inpatient stay. (**Table 2**)

The ACEi/ARB cohort saw a larger risk difference than the other HTN medication cohort in four out of the five outcomes, with an additional 1.5 pp increase in risk of an inpatient stay (95% CI 1.2 to 1.9 pp) and of ICU/CCU use in an inpatient stay (95% CI 0.3 to 2.7 pp), as well as a 0.7 pp (0.1 to 1.2 pp) additional increase in risk of ARD and 0.9 pp (0.4 to 1.3 pp) additional increase in risk of ARDS. There was no statistically significant difference in the absolute risk of death (-0.2 pp, 95% CI -0.4 to 0.1 pp) for the ACEi/ARB group beyond that seen by the other medication group. However, the relative increased risk of death in 2019/2020 vs. 2017/2018 for

1  
2  
3 the ACEi/ARB group was larger (1.40 [1.36 to 1.44]) than for the other HTN medication cohort  
4 (1.24 [1.21 to 1.28]). In other words, each group experienced roughly the same absolute change  
5  
6 in risk (an increase of about 1.6 pp), but the baseline risk of death for the ACEi/ARB group was  
7  
8 lower, so the relative increase was greater.  
9  
10  
11  
12  
13

### 14 Sensitivity analyses

#### 15 *ACEi/ARB monotherapy*

16  
17 When we separated people using only ACEi/ARB from those using ACEi/ARB plus  
18  
19 other HTN medications, results were somewhat different for the two groups. In both the  
20  
21 2018/2019 and 2019/2020 seasons, the monotherapy group had a 3.5 to 4.0 pp higher risk of  
22  
23 ICU/CCU use in an inpatient stay than the polytherapy group. (**Supplementary Material S3**)  
24  
25  
26  
27  
28  
29  
30

#### 31 *People with no comorbidities*

32  
33 The primary effect being studied (ACEi/ARB use during COVID-19) was attenuated  
34  
35 when the cohort was limited to people who did not have any of the comorbidities we identified  
36  
37 (other than hypertension). A large (5.0 pp; 95% CI -0.6 pp to 10.6 pp) increase in the risk of an  
38  
39 inpatient stay with ICU/CCU services was not statistically significant because of the small  
40  
41 sample size (N=7,696 episodes). (**Supplementary Material S3**)  
42  
43  
44  
45  
46

#### 47 *Strict flu season*

48  
49 Limiting the 2017/18 and 2018/19 cohorts to cases of AVRI occurring in the strict flu  
50  
51 season (generally October to May) had minimal effect on the results, which were similar to the  
52  
53 primary analysis. (**Supplementary Material S3**)  
54  
55  
56  
57  
58  
59  
60

## DISCUSSION

In this large observational study, we found that hypertensive patients with an AVRI who were taking ACEis or ARBs for management of their HTN had larger risk differences during the COVID-19 period in the outcomes of inpatient stay, inpatient stay with ICU/CCU, inpatient stay with ARD, and inpatient stay with ARDS when compared with people on other antihypertensive medications. This suggests that people taking ACEi/ARB were more affected by COVID-19 than people taking other HTN medications.

People with AVRI who were using ACEi/ARB had fewer comorbidities compared to people taking other medications to control their blood pressure, which might explain their lower baseline risk of poor outcomes. Prior to the COVID-19 season, among people with hypertension experiencing an episode of AVRI, those who used ACEi/ARB were less likely to have an inpatient stay, less likely to experience ARDS and ARD, and less likely to die compared to people on other antihypertensives at baseline.

Recent observational studies assessing association between ACEi/ARB use and COVID-19 outcomes have generally found lower risk of poor outcomes for ACEi/ARB users,<sup>31-35</sup> however, these studies have differed from ours in important ways. Our finding of lower baseline risk of poor outcomes with AVRI in people taking ACEis/ARBs even after extensively controlling for observed differences in health status highlights the importance of using methods that can control for unobserved differences in health status. Our difference-in-differences approach does this by using non-COVID AVRI outcome differences to control for unobserved differences in underlying health and health care seeking behavior.

1  
2  
3 During the COVID-19 flu season, all patients (ACEi/ARB and other HTN) had higher  
4 risk of all outcomes, compared to prior years. This is consistent with evidence that patients with  
5 hypertension experience worse outcomes from COVID-19.<sup>36-40</sup> The ACEi/ARB group had a  
6 larger increase in poor outcomes from baseline compared to patients taking other HTN  
7 medication, including higher rates of hospitalization, ICU admission, ARD and ARDS. There  
8 was no significant difference in the absolute risk of death for those on ACEi/ARB versus other  
9 medication group.  
10  
11  
12  
13  
14  
15  
16  
17  
18

19 While relative changes in poor AVRI outcomes associated with ACEi/ARB use during  
20 COVID-19 were moderate to large, the absolute differences were relatively small, ranging from  
21 0.7 to 1.9 percentage points. The effects demonstrated in this study may support the theoretical  
22 biological effect of ACEi/ARB in the clinical outcomes of people with COVID-19.  
23  
24 Nevertheless, it is very uncertain whether these effects were mediated through upregulation of  
25 ACE-2 receptors and subsequent susceptibility to SARS-CoV-2, as previously proposed.<sup>1</sup>  
26  
27 Moreover, in translating these findings to clinical practice, the small absolute risk differences  
28 observed here are unlikely to outweigh the clinical benefits of ACEi/ARB therapy for managing  
29 hypertension and heart failure. Therapy selection for these diseases should follow existing  
30 clinical guidelines of nephrology, cardiology, and other societies.  
31  
32  
33  
34  
35  
36  
37  
38  
39  
40  
41  
42  
43

#### 44 **LIMITATIONS**

45  
46 The use of health insurance claims data limits the findings of this study to the populations  
47 included in the OptumLabs Data Warehouse; in particular, we do not observe outcomes of  
48 people who are uninsured or those who have Medicaid insurance (i.e., people with low incomes  
49 and no employer-based insurance). The study only captures people who received health care for  
50  
51  
52  
53  
54  
55  
56  
57  
58  
59  
60



1  
2  
3 AVRI, which may be different in important ways during COVID-19 compared to earlier years;  
4  
5 early in the pandemic, many people avoided seeking in-person care, likely to avoid exposure to  
6  
7 COVID-19 or to preserve access to care for others.<sup>41</sup> However, the difference-in-differences  
8  
9 design of the study addresses this problem by comparing changes in outcomes for two similar  
10  
11 populations; as long as people with hypertension who used ACEi/ARB and those who used other  
12  
13 medications changed their care seeking behavior in similar ways, this effect should be  
14  
15 minimized. Lastly, although analyses were adjusted for age, sex, race/ethnicity and  
16  
17 comorbidities, residual confounding is still a possibility given the observational study design and  
18  
19 other potential confounders that were not evaluated such as number of previous respiratory  
20  
21 infections, number of previous hospitalization, and duration of treatment with ACEi/ARBs.  
22  
23  
24  
25  
26  
27

## 28 **CONCLUSIONS**

29  
30  
31 People with acute viral respiratory illnesses using ACEi/ARBs to treat hypertension had a  
32  
33 greater increase in poor outcomes during the COVID-19 pandemic than those using other  
34  
35 medications to treat hypertension. This may support the existence of the theoretical biological  
36  
37 effect of ACEi/ARB in increasing susceptibility to COVID-19. Small absolute differences in  
38  
39 risks of hospitalization, ICU use, and diagnosis of ARD or ARDS suggest that this effect likely  
40  
41 does not warrant changes in clinical practice.  
42  
43  
44  
45  
46

## 47 **CONTRIBUTORSHIP STATEMENT**

48  
49 Conceptualization: MMJ, LOJS, FB, VDG, TMD, AHL, NWC. Formal analysis: MMJ.

50  
51 Investigation: MMJ, LOJS, FB, VDG, TMD, AHL, NWC. Methodology: MMJ, LOJS, FB.

52  
53 Project administration: MMJ. Supervision: MMJ, NWC. Validation: MMJ, NWC. Writing-

1  
2  
3 original draft: MMJ. Writing-review and editing: MMJ, LOJS, FB, VSD, TMD, AHL, NWC.  
4  
5 Guarantor: MMJ, NWC. All authors provided critical revision and contribution for important  
6  
7 intellectual content.  
8  
9  
10  
11

## 12 **COMPETING INTERESTS**

13  
14  
15 None.  
16  
17  
18

## 19 **FUNDING**

20  
21 This research made possible in part by the Mayo Clinic Robert D. and Patricia E. Kern Center  
22  
23 for the Science of Health Care Delivery.  
24  
25  
26  
27

## 28 **DATA SHARING STATEMENT**

29  
30 No additional data available.  
31  
32  
33  
34  
35  
36  
37  
38  
39  
40  
41  
42  
43  
44  
45  
46  
47  
48  
49  
50  
51  
52  
53  
54  
55  
56  
57  
58  
59  
60

## REFERENCES

1. Vaduganathan M, Vardeny O, Michel T, et al. Renin-Angiotensin-Aldosterone System Inhibitors in Patients with Covid-19. *N Engl J Med* 2020;382(17):1653-59. doi: 10.1056/NEJMsr2005760 [published Online First: 2020/04/01]
2. Mackey K, King VJ, Gurley S, et al. Risks and Impact of Angiotensin-Converting Enzyme Inhibitors or Angiotensin-Receptor Blockers on SARS-CoV-2 Infection in Adults: A Living Systematic Review. *Ann Intern Med* 2020;173(3):195-203. doi: 10.7326/m20-1515 [published Online First: 2020/05/19]
3. Alamer A, Abraham I. Mortality in COVID-19 patients treated with ACEIs/ARBs: Re-estimated meta-analysis results following the Mehra et al. retraction. *Pharmacol Res* 2020;160:105053. doi: 10.1016/j.phrs.2020.105053 [published Online First: 2020/07/04]
4. Baral R, White M, Vassiliou VS. Effect of Renin-Angiotensin-Aldosterone System Inhibitors in Patients with COVID-19: a Systematic Review and Meta-analysis of 28,872 Patients. *Current Atherosclerosis Reports* 2020 22:10 2020;22(10):1-9. doi: 10.1007/S11883-020-00880-6
5. Barochiner J, Martínez R. Use of inhibitors of the renin-angiotensin system in hypertensive patients and COVID-19 severity: A systematic review and meta-analysis. *Journal of Clinical Pharmacy and Therapeutics* 2020;45(6):1244-52. doi: 10.1111/JCPT.13246
6. Caldeira D, Alves M, Gouveia e Melo R, et al. Angiotensin-converting enzyme inhibitors and angiotensin-receptor blockers and the risk of COVID-19 infection or severe disease: Systematic review and meta-analysis. *IJC Heart & Vasculature* 2020;31:100627-27. doi: 10.1016/J.IJCHA.2020.100627
7. Chan C-K, Huang Y-S, Liao H-W, et al. Renin-Angiotensin-Aldosterone System Inhibitors and Risks of Severe Acute Respiratory Syndrome Coronavirus 2 Infection. *Hypertension* 2020;1563-71. doi: 10.1161/HYPERTENSIONAHA.120.15989
8. Flacco ME, Acuti Martellucci C, Bravi F, et al. Treatment with ACE inhibitors or ARBs and risk of severe/lethal COVID-19: a meta-analysis. *Heart* 2020 doi: 10.1136/heartjnl-2020-317336 [published Online First: 2020/07/03]
9. Greco A, Buccheri S, D'Arrigo P, et al. Outcomes of renin-angiotensin-aldosterone system blockers in patients with COVID-19: a systematic review and meta-analysis. *European Heart Journal - Cardiovascular Pharmacotherapy* 2020;6(5):335-37. doi: 10.1093/EHJCVP/PVAA074
10. Grover A, Oberoi M. A systematic review and meta-analysis to evaluate the clinical outcomes in COVID-19 patients on angiotensin-converting enzyme inhibitors or angiotensin receptor blockers. *European Heart Journal - Cardiovascular Pharmacotherapy* 2021;7(2):148-57. doi: 10.1093/EHJCVP/PVAA064
11. Guo X, Zhu Y, Hong Y. Decreased Mortality of COVID-19 With Renin-Angiotensin-Aldosterone System Inhibitors Therapy in Patients With Hypertension. *Hypertension* 2020;11:E13-E14. doi: 10.1161/HYPERTENSIONAHA.120.15572
12. Hasan SS, Kow CS, Hadi MA, et al. Mortality and Disease Severity Among COVID-19 Patients Receiving Renin-Angiotensin System Inhibitors: A Systematic Review and Meta-analysis. *American Journal of Cardiovascular Drugs* 2020 20:6 2020;20(6):571-90. doi: 10.1007/S40256-020-00439-5
13. Kurdi A, Abutheraa N, Akil L, et al. A systematic review and meta-analysis of the use of renin-angiotensin system drugs and COVID-19 clinical outcomes: What is the evidence so far? *Pharmacology Research & Perspectives* 2020;8(6):e00666-e66. doi: 10.1002/PRP2.666
14. Liu X, Long C, Xiong Q, et al. Association of angiotensin converting enzyme inhibitors and angiotensin II receptor blockers with risk of COVID-19, inflammation level, severity, and

- 1  
2  
3 death in patients with COVID-19: A rapid systematic review and meta-analysis. *Clinical*  
4 *Cardiology* 2020 doi: 10.1002/CLC.23421
- 5 15. Lo KB, Bhargav R, Salacup G, et al. Angiotensin converting enzyme inhibitors and  
6 angiotensin II receptor blockers and outcomes in patients with COVID-19: a systematic  
7 review and meta-analysis. <https://doi.org/10.1080/14779072.2020.1826308>  
8 2020;18(12):919-30. doi: 10.1080/14779072.2020.1826308
- 9 16. Patoulias D, Katsimardou A, Stavropoulos K, et al. Renin-Angiotensin System Inhibitors and  
10 COVID-19: a Systematic Review and Meta-Analysis. Evidence for Significant  
11 Geographical Disparities. *Current Hypertension Reports* 2020 22:11 2020;22(11):1-13.  
12 doi: 10.1007/S11906-020-01101-W
- 13 17. Pirola CJ, Sookoian S. Estimation of Renin-Angiotensin-Aldosterone-System (RAAS)-  
14 Inhibitor effect on COVID-19 outcome: A Meta-analysis. *Journal of Infection*  
15 2020;81(2):276-81. doi: 10.1016/J.JINF.2020.05.052
- 16 18. Pranata R, Permana H, Huang I, et al. The use of renin angiotensin system inhibitor on  
17 mortality in patients with coronavirus disease 2019 (COVID-19): A systematic review and  
18 meta-analysis. *Diabetes & Metabolic Syndrome: Clinical Research & Reviews*  
19 2020;14(5):983-90. doi: 10.1016/J.DSX.2020.06.047
- 20 19. Salah HM, Calcaterra G, Mehta JL. Renin-Angiotensin System Blockade and Mortality in  
21 Patients With Hypertension and COVID-19 Infection.  
22 <https://doi.org/10.1177/1074248420947628> 2020;25(6):503-07. doi:  
23 10.1177/1074248420947628
- 24 20. Usman MS, Siddiqi TJ, Khan MS, et al. A Meta-analysis of the Relationship Between Renin-  
25 Angiotensin-Aldosterone System Inhibitors and COVID-19. *American Journal of*  
26 *Cardiology* 2020;130:159-61. doi: 10.1016/J.AMJCARD.2020.05.038
- 27 21. Wang Y, Chen B, Li Y, et al. The use of renin-angiotensin-aldosterone system (RAAS)  
28 inhibitors is associated with a lower risk of mortality in hypertensive COVID-19 patients:  
29 A systematic review and meta-analysis. *Journal of Medical Virology* 2021;93(3):1370-77.  
30 doi: 10.1002/JMV.26625
- 31 22. Xu J, Teng Y, Shang L, et al. The Effect of Prior Angiotensin-Converting Enzyme Inhibitor  
32 and Angiotensin Receptor Blocker Treatment on Coronavirus Disease 2019 (COVID-19)  
33 Susceptibility and Outcome: A Systematic Review and Meta-analysis. *Clinical Infectious*  
34 *Diseases* 2021;72(11):e901-e13. doi: 10.1093/CID/CIAA1592
- 35 23. Zhang X, Yu J, Pan Ly, et al. ACEI/ARB use and risk of infection or severity or mortality of  
36 COVID-19: A systematic review and meta-analysis. *Pharmacological Research*  
37 2020;158:104927-27. doi: 10.1016/J.PHRS.2020.104927
- 38 24. Cohen JB, Hanff TC, William P, et al. Continuation versus discontinuation of renin-  
39 angiotensin system inhibitors in patients admitted to hospital with COVID-19: a  
40 prospective, randomised, open-label trial. *The Lancet Respiratory Medicine*  
41 2021;9(3):275-84. doi: 10.1016/S2213-2600(20)30558-0
- 42 25. Lopes RD, Macedo AVS, Silva PGMdBE, et al. Effect of Discontinuing vs Continuing  
43 Angiotensin-Converting Enzyme Inhibitors and Angiotensin II Receptor Blockers on  
44 Days Alive and Out of the Hospital in Patients Admitted With COVID-19: A Randomized  
45 Clinical Trial. *JAMA* 2021;325(3):254-64. doi: 10.1001/JAMA.2020.25864
- 46 26. Benchimol EI, Smeeth L, Guttman A, et al. The REporting of studies Conducted using  
47 Observational Routinely-collected health Data (RECORD) statement. *PLoS Med*  
48 2015;12(10):e1001885. doi: 10.1371/journal.pmed.1001885 [published Online First:  
49 2015/10/07]
- 50 27. Wallace PJ, Shah ND, Dennen T, et al. Optum Labs: building a novel node in the learning  
51 health care system. *Health Aff (Millwood)* 2014;33(7):1187-94. doi:  
52 10.1377/hlthaff.2014.0038 [published Online First: 2014/07/10]
- 53  
54  
55  
56  
57  
58  
59  
60

- 1
  - 2
  - 3
  - 4
  - 5
  - 6
  - 7
  - 8
  - 9
  - 10
  - 11
  - 12
  - 13
  - 14
  - 15
  - 16
  - 17
  - 18
  - 19
  - 20
  - 21
  - 22
  - 23
  - 24
  - 25
  - 26
  - 27
  - 28
  - 29
  - 30
  - 31
  - 32
  - 33
  - 34
  - 35
  - 36
  - 37
  - 38
  - 39
  - 40
  - 41
  - 42
  - 43
  - 44
  - 45
  - 46
  - 47
  - 48
  - 49
  - 50
  - 51
  - 52
  - 53
  - 54
  - 55
  - 56
  - 57
  - 58
  - 59
  - 60
28. Quan H, Sundararajan V, Halfon P, et al. Coding algorithms for defining comorbidities in ICD-9-CM and ICD-10 administrative data. *Med Care* 2005;43(11):1130-9. doi: 10.1097/01.mlr.0000182534.19832.83 [published Online First: 2005/10/15]
29. National Committee for Quality Assurance. 2019 Quality Rating System (QRS) HEDIS Value Set Directory 2019 [Available from: <https://store.ncqa.org/2019-quality-rating-system-qrs-hedis-value-set-directory.html>] accessed 9/7/2021.
30. Centers for Disease Control and Prevention. Past Seasons Estimated Influenza Disease Burden [Available from: <https://www.cdc.gov/flu/about/burden/index.html>] accessed 9/7/2021.
31. Sato K, White N, Fanning JP, et al. Impact of renin-angiotensin-aldosterone system inhibition on mortality in critically ill COVID-19 patients with pre-existing hypertension: a prospective cohort study. *BMC Cardiovasc Disord* 2022;22(1):123. doi: 10.1186/s12872-022-02565-1 [published Online First: 20220323]
32. Smith SM, Desai RA, Walsh MG, et al. Angiotensin-converting enzyme inhibitors, angiotensin receptor blockers, and COVID-19-related outcomes: A patient-level analysis of the PCORnet blood pressure control lab. *Am Heart J Plus* 2022;13:100112. doi: 10.1016/j.ahjo.2022.100112 [published Online First: 20220302]
33. Angeli F, Verdecchia P, Balestrino A, et al. Renin Angiotensin System Blockers and Risk of Mortality in Hypertensive Patients Hospitalized for COVID-19: An Italian Registry. *J Cardiovasc Dev Dis* 2022;9(1) doi: 10.3390/jcdd9010015 [published Online First: 20220106]
34. Rizk JG, Wenziger C, Tran D, et al. Angiotensin-Converting Enzyme Inhibitor and Angiotensin Receptor Blocker Use Associated with Reduced Mortality and Other Disease Outcomes in US Veterans with COVID-19. *Drugs* 2022;82(1):43-54. doi: 10.1007/s40265-021-01639-2 [published Online First: 20211216]
35. Soler MJ, Ribera A, Marsal JR, et al. Association of renin-angiotensin system blockers with COVID-19 diagnosis and prognosis in patients with hypertension: a population-based study. *Clin Kidney J* 2022;15(1):79-94. doi: 10.1093/ckj/sfab161 [published Online First: 20210903]
36. Killerby ME, Link-Gelles R, Haight SC, et al. Characteristics Associated with Hospitalization Among Patients with COVID-19 - Metropolitan Atlanta, Georgia, March-April 2020. *MMWR Morb Mortal Wkly Rep* 2020;69(25):790-94. doi: 10.15585/mmwr.mm6925e1 [published Online First: 20200626]
37. Sheppard JP, Nicholson BD, Lee J, et al. Association Between Blood Pressure Control and Coronavirus Disease 2019 Outcomes in 45 418 Symptomatic Patients With Hypertension: An Observational Cohort Study. *Hypertension* 2021;77(3):846-55. doi: 10.1161/hypertensionaha.120.16472 [published Online First: 20201216]
38. Williamson EJ, Walker AJ, Bhaskaran K, et al. Factors associated with COVID-19-related death using OpenSAFELY. *Nature* 2020;584(7821):430-36. doi: 10.1038/s41586-020-2521-4 [published Online First: 20200708]
39. Wu Z, McGoogan JM. Characteristics of and Important Lessons From the Coronavirus Disease 2019 (COVID-19) Outbreak in China: Summary of a Report of 72 314 Cases From the Chinese Center for Disease Control and Prevention. *Jama* 2020;323(13):1239-42. doi: 10.1001/jama.2020.2648
40. Zhou F, Yu T, Du R, et al. Clinical course and risk factors for mortality of adult inpatients with COVID-19 in Wuhan, China: a retrospective cohort study. *Lancet* 2020;395(10229):1054-62. doi: 10.1016/s0140-6736(20)30566-3 [published Online First: 20200311]
41. Jeffery MM, D'Onofrio G, Paek H, et al. Trends in Emergency Department Visits and Hospital Admissions in Health Care Systems in 5 States in the First Months of the

1  
2  
3  
4  
5  
6  
7  
8  
9  
10  
11  
12  
13  
14  
15  
16  
17  
18  
19  
20  
21  
22  
23  
24  
25  
26  
27  
28  
29  
30  
31  
32  
33  
34  
35  
36  
37  
38  
39  
40  
41  
42  
43  
44  
45  
46  
47  
48  
49  
50  
51  
52  
53  
54  
55  
56  
57  
58  
59  
60

COVID-19 Pandemic in the US. *JAMA Intern Med* 2020;180(10):1328-33. doi:  
10.1001/jamainternmed.2020.3288

For peer review only

1  
2  
3 **LEGENDS**  
4

5 **Table 1.** Cohort characteristics.  
6  
7

8 **Table 2.** Main analysis results from linear probability model; full results in supplementary  
9 materials.  
10  
11  
12  
13  
14  
15  
16  
17  
18  
19  
20  
21  
22  
23  
24  
25  
26  
27  
28  
29  
30  
31  
32  
33  
34  
35  
36  
37  
38  
39  
40  
41  
42  
43  
44  
45  
46  
47  
48  
49  
50  
51  
52  
53  
54  
55  
56  
57  
58  
59  
60



**Table 1.** Cohort characteristics.

|                         | Comparison only<br>(not included<br>sample)<br>No HTN meds<br>N (%) | Included Sample                 |                      | Total included<br>sample<br>N (%) |
|-------------------------|---------------------------------------------------------------------|---------------------------------|----------------------|-----------------------------------|
|                         |                                                                     | Other HTN meds<br>only<br>N (%) | ACEi or ARB<br>N (%) |                                   |
| <b>Insurance type</b>   |                                                                     |                                 |                      |                                   |
| Medicare Advantage      | 145,045 (77.2%)                                                     | 348,583 (85.9%)                 | 518,670 (79.3%)      | 867,253 (81.9%)                   |
| Commercial              | 42,874 (22.8%)                                                      | 57,094 (14.1%)                  | 135,127 (20.7%)      | 192,221 (18.1%)                   |
| <b>Female</b>           | 99,755 (53.1%)                                                      | 246,659 (60.8%)                 | 374,151 (57.2%)      | 620,810 (58.6%)                   |
| <b>Age (categories)</b> |                                                                     |                                 |                      |                                   |
| <35                     | 3,922 (2.1%)                                                        | 3,354 (0.8%)                    | 4,537 (0.7%)         | 7,891 (0.7%)                      |
| 35-44                   | 8,337 (4.4%)                                                        | 9,784 (2.4%)                    | 17,780 (2.7%)        | 27,564 (2.6%)                     |
| 45-54                   | 17,704 (9.4%)                                                       | 24,916 (6.1%)                   | 51,926 (7.9%)        | 76,842 (7.3%)                     |
| 55-64                   | 32,637 (17.4%)                                                      | 59,872 (14.8%)                  | 115,095 (17.6%)      | 174,967 (16.5%)                   |
| 65-74                   | 54,862 (29.2%)                                                      | 120,039 (29.6%)                 | 218,160 (33.4%)      | 338,199 (31.9%)                   |
| 75-84                   | 44,330 (23.6%)                                                      | 115,011 (28.4%)                 | 171,276 (26.2%)      | 286,287 (27.0%)                   |
| 85+                     | 26,127 (13.9%)                                                      | 72,701 (17.9%)                  | 75,023 (11.5%)       | 147,724 (13.9%)                   |
| <b>Race/ethnicity</b>   |                                                                     |                                 |                      |                                   |
| White                   | 109,223 (58.1%)                                                     | 238,439 (58.8%)                 | 372,987 (57.0%)      | 611,426 (57.7%)                   |
| Black                   | 28,990 (15.4%)                                                      | 70,774 (17.4%)                  | 103,284 (15.8%)      | 174,058 (16.4%)                   |
| Hispanic                | 20,302 (10.8%)                                                      | 36,478 (9.0%)                   | 82,374 (12.6%)       | 118,852 (11.2%)                   |
| Asian                   | 4,449 (2.4%)                                                        | 8,003 (2.0%)                    | 15,063 (2.3%)        | 23,066 (2.2%)                     |
| Unknown/other           | 24,955 (13.3%)                                                      | 51,983 (12.8%)                  | 80,089 (12.2%)       | 132,072 (12.5%)                   |
| <b>Census Division</b>  |                                                                     |                                 |                      |                                   |
| New England             | 7,217 (3.8%)                                                        | 18,358 (4.5%)                   | 25,557 (3.9%)        | 43,915 (4.1%)                     |
| Mid Atlantic            | 18,655 (9.9%)                                                       | 43,354 (10.7%)                  | 59,385 (9.1%)        | 102,739 (9.7%)                    |
| South Atlantic          | 66,206 (35.2%)                                                      | 154,483 (38.1%)                 | 252,798 (38.7%)      | 407,281 (38.4%)                   |
| E North Central         | 24,489 (13.0%)                                                      | 59,277 (14.6%)                  | 86,110 (13.2%)       | 145,387 (13.7%)                   |
| E South Central         | 12,743 (6.8%)                                                       | 28,786 (7.1%)                   | 47,182 (7.2%)        | 75,968 (7.2%)                     |
| W North Central         | 18,292 (9.7%)                                                       | 28,065 (6.9%)                   | 42,997 (6.6%)        | 71,062 (6.7%)                     |
| W South Central         | 25,743 (13.7%)                                                      | 48,406 (11.9%)                  | 92,517 (14.2%)       | 140,923 (13.3%)                   |
| Mountain                | 8,484 (4.5%)                                                        | 14,224 (3.5%)                   | 27,963 (4.3%)        | 42,187 (4.0%)                     |
| Pacific                 | 5,902 (3.1%)                                                        | 10,612 (2.6%)                   | 19,087 (2.9%)        | 29,699 (2.8%)                     |
| Unknown/Other           | 188 (0.1%)                                                          | 112 (0.0%)                      | 201 (0.0%)           | 313 (<0.1%)                       |
| <b>Hypertension</b>     |                                                                     |                                 |                      |                                   |



|                                                                | Comparison only<br>(not included<br>sample) | Included Sample        |                  |                          |
|----------------------------------------------------------------|---------------------------------------------|------------------------|------------------|--------------------------|
|                                                                | No HTN meds                                 | Other HTN meds<br>only | ACEi or ARB      | Total included<br>sample |
|                                                                | N (%)                                       | N (%)                  | N (%)            | N (%)                    |
| No complications                                               | 164,325 (87.4%)                             | 334,180 (82.4%)        | 572,570 (87.6%)  | 906,750 (85.6%)          |
| With complications                                             | 23,594 (12.6%)                              | 71,497 (17.6%)         | 81,227 (12.4%)   | 152,724 (14.4%)          |
| <b>Comorbidities</b>                                           |                                             |                        |                  |                          |
| Diabetes                                                       |                                             |                        |                  |                          |
| No complications                                               | 22,002 (11.7%)                              | 42,302 (10.4%)         | 99,778 (15.3%)   | 142,080 (13.4%)          |
| With complications                                             | 37,742 (20.1%)                              | 99,365 (24.5%)         | 172,335 (26.4%)  | 271,700 (25.6%)          |
| Chronic pulmonary disease                                      | 66,355 (35.3%)                              | 163,682 (40.3%)        | 209,053 (32.0%)  | 372,735 (35.2%)          |
| Coronary artery disease                                        | 41,083 (21.9%)                              | 122,633 (30.2%)        | 156,465 (23.9%)  | 279,098 (26.3%)          |
| Congestive heart failure                                       | 30,910 (16.4%)                              | 123,355 (30.4%)        | 131,418 (20.1%)  | 254,773 (24.0%)          |
| Cardia arrhythmia                                              | 47,176 (25.1%)                              | 138,713 (34.2%)        | 149,765 (22.9%)  | 288,478 (27.2%)          |
| Valvular disease                                               | 15,929 (8.5%)                               | 50,011 (12.3%)         | 55,342 (8.5%)    | 105,353 (9.9%)           |
| Chronic/acute deep vein<br>thrombosis or pulmonary<br>embolism | 6,657 (3.5%)                                | 13,846 (3.4%)          | 13,883 (2.1%)    | 27,729 (2.6%)            |
| Peripheral vascular disorders                                  | 24,473 (13.0%)                              | 66,643 (16.4%)         | 74,909 (11.5%)   | 141,552 (13.4%)          |
| Hemorrhagic or ischemic stroke                                 | 15,912 (8.5%)                               | 34,297 (8.5%)          | 39,064 (6.0%)    | 73,361 (6.9%)            |
| Coagulopathy                                                   | 10,197 (5.4%)                               | 25,467 (6.3%)          | 22,109 (3.4%)    | 47,576 (4.5%)            |
| Lymphoma                                                       | 2,928 (1.6%)                                | 6,095 (1.5%)           | 6,086 (.9%)      | 12,181 (1.1%)            |
| Metastatic cancer                                              | 6,506 (3.5%)                                | 11,323 (2.8%)          | 11,808 (1.8%)    | 23,131 (2.2%)            |
| Solid tumor without mets                                       | 17,654 (9.4%)                               | 35,097 (8.7%)          | 42,177 (6.5%)    | 77,274 (7.3%)            |
| Renal failure                                                  | 29,431 (15.7%)                              | 104,877 (25.9%)        | 107,485 (16.4%)  | 212,362 (20.0%)          |
| Liver failure                                                  | 8,676 (4.6%)                                | 19,071 (4.7%)          | 19,875 (3.0%)    | 38,946 (3.7%)            |
| Rheumatoid arthritis/collagen<br>vascular diseases             | 8,584 (4.6%)                                | 20,953 (5.2%)          | 27,768 (4.2%)    | 48,721 (4.6%)            |
| Obesity                                                        | 17,709 (9.4%)                               | 44,279 (10.9%)         | 72,278 (11.1%)   | 116,557 (11.0%)          |
| <b>Total</b>                                                   | 187,919 (100.0%)                            | 405,677 (100.0%)       | 653,797 (100.0%) | 1,059,474 (100.0%)       |
| <b>Unadjusted outcome incidence</b>                            |                                             |                        |                  |                          |
| Inpatient stay                                                 | 33,058 (17.6%)                              | 75,670 (18.7%)         | 91,660 (14.0%)   | 167,330 (15.8%)          |
| ICU/CCU services during<br>inpatient stay                      | 15,360 (46.5%)                              | 37,894 (50.1%)         | 45,129 (49.2%)   | 83,023 (49.6%)           |
| ARDS diagnosis during<br>inpatient stay                        | 1,051 (3.2%)                                | 2,598 (3.4%)           | 3,403 (3.7%)     | 6,001 (3.6%)             |
| ARD diagnosis during<br>inpatient stay                         | 1,781 (5.4%)                                | 4,749 (6.3%)           | 5,388 (5.9%)     | 10,137 (6.1%)            |
| Died same or following calendar<br>month                       | 12,933 (6.9%)                               | 28,753 (7.1%)          | 26,411 (4.0%)    | 55,164 (5.2%)            |

**Table 2.** Main analysis results from linear probability model; full results in supplementary materials.

|                                                            | (1)                          | (2)                         | (3)                         | (4)                          | (5)                          |
|------------------------------------------------------------|------------------------------|-----------------------------|-----------------------------|------------------------------|------------------------------|
|                                                            | Inpatient stay               | Inpatient stay with ICU/CCU | Inpatient stay with ARD dx  | Inpatient stay with ARDS dx  | Died same or following month |
| <b>Key coefficient estimates (95% confidence interval)</b> |                              |                             |                             |                              |                              |
| <b>Season</b>                                              |                              |                             |                             |                              |                              |
| 2017-2018 flu season                                       | ref.                         | ref.                        | ref.                        | ref.                         | ref.                         |
| 2018-2019 flu season                                       | -0.001<br>(-0.004,0.002)     | 0.008<br>(-0.002,0.018)     | 0.013***<br>(0.008,0.017)   | -0.007***<br>(-0.010,-0.004) | 0.000<br>(-0.002,0.002)      |
| 2019-2020 flu season                                       | 0.018***<br>(0.015,0.021)    | 0.035***<br>(0.026,0.044)   | 0.013***<br>(0.008,0.017)   | 0.013***<br>(0.009,0.016)    | 0.016***<br>(0.014,0.017)    |
| <b>HTN medication group</b>                                |                              |                             |                             |                              |                              |
| Other medications only                                     | ref.                         | ref.                        | ref.                        | ref.                         | ref.                         |
| ACEi or ARB plus/minus other medications                   | -0.019***<br>(-0.022,-0.016) | -0.009<br>(-0.019,0.001)    | -0.007**<br>(-0.011,-0.002) | -0.003<br>(-0.007,0.000)     | -0.009***<br>(-0.011,-0.008) |
| <b>Season/medication interactions</b>                      |                              |                             |                             |                              |                              |
| 2018-2019 season: ACEi or ARB plus/minus other medications | 0.004*<br>(0.001,0.008)      | 0.010<br>(-0.004,0.023)     | 0.004<br>(-0.003,0.010)     | 0.000<br>(-0.004,0.004)      | 0.000<br>(-0.002,0.002)      |
| 2019-2020 season: ACEi or ARB plus/minus other medications | 0.015***<br>(0.012,0.019)    | 0.015*<br>(0.003,0.027)     | 0.007*<br>(0.001,0.012)     | 0.009***<br>(0.004,0.013)    | -0.002<br>(-0.004,0.001)     |

Note: p-value for coefficients is for the null hypothesis that the coefficient = 0; presented in probability units (e.g., coefficient of -0.001 represents -0.1 percentage points)

**Marginal effects/predicted probability (95% confidence interval)**

**Other hypertension medications only**

|         |                        |                        |                        |                        |                        |
|---------|------------------------|------------------------|------------------------|------------------------|------------------------|
| 2017/18 | 0.179<br>(0.177,0.181) | 0.482<br>(0.474,0.489) | 0.053<br>(0.050,0.056) | 0.030<br>(0.028,0.033) | 0.064<br>(0.062,0.065) |
| 2018/19 | 0.178<br>(0.176,0.180) | 0.490<br>(0.483,0.496) | 0.066<br>(0.062,0.069) | 0.023<br>(0.021,0.025) | 0.064<br>(0.063,0.065) |
| 2019/20 | 0.196                  | 0.516                  | 0.066                  | 0.043                  | 0.080                  |

|                                                             | (1)                             | (2)                                             | (3)                                            | (4)                                             | (5)                                                 |
|-------------------------------------------------------------|---------------------------------|-------------------------------------------------|------------------------------------------------|-------------------------------------------------|-----------------------------------------------------|
|                                                             | Inpatient stay<br>(0.195,0.198) | Inpatient stay<br>with ICU/CCU<br>(0.511,0.521) | Inpatient stay<br>with ARD dx<br>(0.063,0.068) | Inpatient stay<br>with ARDS dx<br>(0.041,0.045) | Died same or<br>following<br>month<br>(0.078,0.081) |
| <b>ACEi or ARB<br/>plus/minus other<br/>medications</b>     |                                 |                                                 |                                                |                                                 |                                                     |
| 2017/18                                                     | 0.125<br>(0.124,0.127)          | 0.463<br>(0.456,0.470)                          | 0.045<br>(0.042,0.048)                         | 0.029<br>(0.027,0.031)                          | 0.035<br>(0.034,0.035)                              |
| 2018/19                                                     | 0.128<br>(0.127,0.130)          | 0.481<br>(0.475,0.487)                          | 0.061<br>(0.058,0.064)                         | 0.021<br>(0.020,0.023)                          | 0.034<br>(0.034,0.035)                              |
| 2019/20                                                     | 0.158<br>(0.157,0.160)          | 0.512<br>(0.508,0.517)                          | 0.064<br>(0.062,0.066)                         | 0.050<br>(0.048,0.052)                          | 0.049<br>(0.048,0.049)                              |
| <b>Ratios of marginal effects (95% confidence interval)</b> |                                 |                                                 |                                                |                                                 |                                                     |
| <b>Other hypertension<br/>medications only</b>              |                                 |                                                 |                                                |                                                 |                                                     |
| 2018/19 season vs.<br>2017/18                               | 0.994<br>(0.977,1.011)          | 1.017<br>(0.996,1.038)                          | 1.236***<br>(1.136,1.337)                      | 0.759***<br>(0.668,0.850)                       | 0.999<br>(0.969,1.030)                              |
| 2019/20 season vs.<br>2017/18                               | 1.099***<br>(1.081,1.116)       | 1.072***<br>(1.053,1.092)                       | 1.238***<br>(1.147,1.330)                      | 1.414***<br>(1.278,1.550)                       | 1.244***<br>(1.210,1.278)                           |
| <b>ACEi or ARB<br/>plus/minus other<br/>medications</b>     |                                 |                                                 |                                                |                                                 |                                                     |
| 2018/19 season vs.<br>2017/18                               | 1.025**<br>(1.009,1.042)        | 1.039***<br>(1.019,1.058)                       | 1.360***<br>(1.251,1.469)                      | 0.739***<br>(0.656,0.822)                       | 0.993<br>(0.961,1.025)                              |
| 2019/20 season vs.<br>2017/18                               | 1.264***<br>(1.245,1.282)       | 1.107***<br>(1.088,1.126)                       | 1.437***<br>(1.332,1.542)                      | 1.731***<br>(1.580,1.882)                       | 1.404***<br>(1.363,1.444)                           |

Note: p-value for risk ratios is for the null hypothesis that the risk ratio = 1

\* p<0.05, \*\* p<0.01, \*\*\* p<0.001  
ref.: reference category

1  
2  
3 **SUPPLEMENTARY MATERIAL S1**  
4

5 SUPPLEMENT T1: Codes used to define AVRI, CAD, stroke, DVT, and PE  
6

| Condition                                              | Codes                                                                                                                                                                                    |
|--------------------------------------------------------|------------------------------------------------------------------------------------------------------------------------------------------------------------------------------------------|
| Acute viral respiratory illness (AVRI)                 | B9721, B9729, J09*, J10*, J11*, J12*, J16, J168, J18, J180, J181, J182, J188, J189, J20, J201, J203, J204, J205, J206, J207, J208, J209, J22, J40, J440, J470, J8411, J84111, U071, U072 |
| Coronary artery disease (CAD)                          | I20*, I21*, I22*, I23*, I24*, I25*                                                                                                                                                       |
| Stroke                                                 | I63*, Z8673*, I60*, I61*, I62*                                                                                                                                                           |
| Deep vein thrombosis (DVT) and pulmonary embolism (PE) | I8249, I824Y, I824Z, I8251, I8259, I825Y, I825Z, I8262, I8272, I26*, I2782                                                                                                               |

19  
20  
21 SUPPLEMENT T2: Hypertension medications

| Medication type                                               | Included medications (generic name)                                                                                                                                                                                                                                                                                                                                                                                                                                                                                                                     |
|---------------------------------------------------------------|---------------------------------------------------------------------------------------------------------------------------------------------------------------------------------------------------------------------------------------------------------------------------------------------------------------------------------------------------------------------------------------------------------------------------------------------------------------------------------------------------------------------------------------------------------|
| ACEi                                                          | captopril, lisinopril, enalapril, benazepril, perindopril, quinapril, fosinopril, moexipril, ramipril, trandolapril                                                                                                                                                                                                                                                                                                                                                                                                                                     |
| ARB                                                           | losartan, valsartan, irbesartan, candesartan, eprosartan, telmisartan, azilsartan, Olmesartan                                                                                                                                                                                                                                                                                                                                                                                                                                                           |
| Other (excluding topical, ophthalmic, and drops preparations) | Bendroflumethiazide, chlorothiazide, indapamide, metolazone, bumetanide, furosemide, torsemide, ethacrynic, amiloride, triamterene, eplerenone, spironolactone, aliskiren, diltiazem, verapamil, amlodipine, nicardipine, felodipine, nifedipine, torsemide, ethacrynic, isradipine, nisoldipine, doxazosin, prazosin, terazosin, clonidine, guanfacine, methyl dopa, reserpine, hydralazine, minoxidil, acebutolol, atenolol, betaxolol, bisoprolol, carvedilol, labetalol, metoprolol, nadolol, nebivolol, penbutolol, pindolol, propranolol, timolol |

Primary analysis

|                                           | (1)                                         | (2)                                                      | (3)                                                     | (4)                                                      | (5)                                                       |
|-------------------------------------------|---------------------------------------------|----------------------------------------------------------|---------------------------------------------------------|----------------------------------------------------------|-----------------------------------------------------------|
|                                           | Inpatient stay<br>(95% confidence interval) | Inpatient stay with ICU/CCU<br>(95% confidence interval) | Inpatient stay with ARD dx<br>(95% confidence interval) | Inpatient stay with ARDS dx<br>(95% confidence interval) | Died same or following month<br>(95% confidence interval) |
| Flu season / medication type              |                                             |                                                          |                                                         |                                                          |                                                           |
| 2017-2018 flu season                      | ref.                                        | ref.                                                     | ref.                                                    | ref.                                                     | ref.                                                      |
| 2018-2019 flu season                      | -0.001<br>(-0.004,0.002)                    | 0.008<br>(-0.002,0.018)                                  | 0.013***<br>(0.008,0.017)                               | -0.007***<br>(-0.010,-0.004)                             | 0.000<br>(-0.002,0.002)                                   |
| 2019-2020 flu season                      | 0.018***<br>(0.015,0.021)                   | 0.035***<br>(0.026,0.044)                                | 0.013***<br>(0.008,0.017)                               | 0.013***<br>(0.009,0.016)                                | 0.016***<br>(0.014,0.017)                                 |
| Other medications only                    | ref.                                        | ref.                                                     | ref.                                                    | ref.                                                     | ref.                                                      |
| ACEi or ARB plus/minus other medications  | -0.019***<br>(-0.022,-0.016)                | -0.009<br>(-0.019,0.001)                                 | -0.007**<br>(-0.011,-0.002)                             | -0.003<br>(-0.007,0.000)                                 | -0.009***<br>(-0.011,-0.008)                              |
| ACEi or ARB monotherapy                   |                                             |                                                          |                                                         |                                                          |                                                           |
| 2018-2019 season: ACEi or ARB +/- other   | 0.004*<br>(0.001,0.008)                     | 0.01<br>(-0.004,0.023)                                   | 0.004<br>(-0.003,0.010)                                 | 0<br>(-0.004,0.004)                                      | 0<br>(-0.002,0.002)                                       |
| 2018-2019 season: ACEi or ARB monotherapy |                                             |                                                          |                                                         |                                                          |                                                           |
| 2019-2020 season: ACEi or ARB +/- other   | 0.015***<br>(0.012,0.019)                   | 0.015*<br>(0.003,0.027)                                  | 0.007*<br>(0.001,0.012)                                 | 0.009***<br>(0.004,0.013)                                | -0.002<br>(-0.004,0.001)                                  |
| 2019-2020 season: ACEi or ARB monotherapy |                                             |                                                          |                                                         |                                                          |                                                           |
| Demographics                              |                                             |                                                          |                                                         |                                                          |                                                           |
| Female                                    | -0.016***<br>(-0.017,-0.014)                | -0.023***<br>(-0.028,-0.018)                             | 0<br>(-0.002,0.003)                                     | -0.004***<br>(-0.006,-0.002)                             | -0.011***<br>(-0.012,-0.010)                              |
| Age categories                            |                                             |                                                          |                                                         |                                                          |                                                           |
| <35                                       | -0.006*<br>(-0.011,-0.000)                  | -0.029<br>(-0.078,0.019)                                 | 0.02<br>(-0.006,0.045)                                  | -0.01<br>(-0.028,0.008)                                  | -0.001<br>(-0.003,0.001)                                  |
| 35-44                                     | -0.008***<br>(-0.012,-0.005)                | -0.028<br>(-0.056,0.000)                                 | 0.006<br>(-0.008,0.019)                                 | -0.004<br>(-0.016,0.008)                                 | 0.001<br>(-0.000,0.002)                                   |
| 45-54                                     | ref.                                        | ref.                                                     | ref.                                                    | ref.                                                     | ref.                                                      |
| 55-64                                     | 0.010***<br>(0.008,0.013)                   | 0.005<br>(-0.009,0.020)                                  | 0.001<br>(-0.005,0.008)                                 | 0.001<br>(-0.005,0.007)                                  | 0.001*<br>(0.000,0.002)                                   |
| 65-74                                     | 0.011***<br>(0.008,0.014)                   | -0.003<br>(-0.017,0.011)                                 | 0.001<br>(-0.006,0.008)                                 | -0.001<br>(-0.007,0.004)                                 | 0.009***<br>(0.007,0.010)                                 |
| 75-84                                     | 0.029***<br>(0.025,0.032)                   | -0.026***<br>(-0.041,-0.012)                             | -0.002<br>(-0.009,0.004)                                | -0.005<br>(-0.011,0.001)                                 | 0.024***<br>(0.023,0.026)                                 |
| 85+                                       | 0.045***<br>(0.041,0.048)                   | -0.071***<br>(-0.086,-0.056)                             | -0.010**<br>(-0.017,-0.003)                             | -0.014***<br>(-0.020,-0.008)                             | 0.063***<br>(0.061,0.065)                                 |
| Insurance coverage type                   |                                             |                                                          |                                                         |                                                          |                                                           |
| Medicare Advantage                        | ref.                                        | ref.                                                     | ref.                                                    | ref.                                                     | ref.                                                      |
| Commercial                                | -0.032***<br>(-0.034,-0.030)                | 0.01<br>(-0.001,0.020)                                   | 0.001<br>(-0.004,0.006)                                 | 0.003<br>(-0.002,0.007)                                  | -0.001*<br>(-0.002,-0.000)                                |
| Census region                             |                                             |                                                          |                                                         |                                                          |                                                           |
| Unknown/other                             | -0.046**<br>(-0.075,-0.016)                 | 0.194*<br>(0.014,0.373)                                  | -0.011<br>(-0.086,0.064)                                | 0.009<br>(-0.068,0.087)                                  | -0.023*<br>(-0.044,-0.002)                                |
| New England                               | ref.                                        | ref.                                                     | ref.                                                    | ref.                                                     | ref.                                                      |
| Mid Atlantic                              | -0.008***<br>(-0.012,-0.003)                | 0.017*<br>(0.003,0.031)                                  | 0.021***<br>(0.015,0.028)                               | 0.021***<br>(0.016,0.026)                                | -0.005**<br>(-0.008,-0.002)                               |
| South Atlantic                            | -0.001<br>(-0.005,0.003)                    | 0.122***<br>(0.110,0.134)                                | 0.016***<br>(0.011,0.021)                               | 0.003<br>(-0.002,0.007)                                  | -0.016***<br>(-0.018,-0.013)                              |

1  
2  
3  
4  
5  
6  
7  
8  
9  
10  
11  
12  
13  
14  
15  
16  
17  
18  
19  
20  
21  
22  
23  
24  
25  
26  
27  
28  
29  
30  
31  
32  
33  
34  
35  
36  
37  
38  
39  
40  
41  
42  
43  
44  
45  
46  
47

|                               |  | Primary analysis                            |                                                          |                                                         |                                                          |                                                           |
|-------------------------------|--|---------------------------------------------|----------------------------------------------------------|---------------------------------------------------------|----------------------------------------------------------|-----------------------------------------------------------|
|                               |  | (1)                                         | (2)                                                      | (3)                                                     | (4)                                                      | (5)                                                       |
|                               |  | Inpatient stay<br>(95% confidence interval) | Inpatient stay with ICU/CCU<br>(95% confidence interval) | Inpatient stay with ARD dx<br>(95% confidence interval) | Inpatient stay with ARDS dx<br>(95% confidence interval) | Died same or following month<br>(95% confidence interval) |
| E North Central               |  | 0.018***<br>(0.013,0.022)                   | 0.073***<br>(0.060,0.086)                                | 0.003<br>(-0.002,0.009)                                 | 0<br>(-0.004,0.004)                                      | -0.009***<br>(-0.012,-0.007)                              |
| E South Central               |  | 0.011***<br>(0.007,0.016)                   | 0.071***<br>(0.056,0.085)                                | 0.018***<br>(0.011,0.024)                               | -0.001<br>(-0.006,0.005)                                 | -0.009***<br>(-0.011,-0.006)                              |
| W North Central               |  | 0.027***<br>(0.022,0.032)                   | 0.093***<br>(0.079,0.107)                                | 0.004<br>(-0.002,0.010)                                 | 0.006*<br>(0.001,0.011)                                  | -0.007***<br>(-0.010,-0.004)                              |
| W South Central               |  | 0.014***<br>(0.010,0.018)                   | 0.111***<br>(0.097,0.124)                                | 0.017***<br>(0.011,0.023)                               | 0.003<br>(-0.002,0.007)                                  | -0.011***<br>(-0.014,-0.009)                              |
| Mountain                      |  | -0.033***<br>(-0.037,-0.028)                | 0.122***<br>(0.103,0.140)                                | -0.007<br>(-0.015,0.000)                                | 0.008*<br>(0.001,0.016)                                  | -0.019***<br>(-0.022,-0.016)                              |
| Pacific                       |  | -0.002<br>(-0.007,0.004)                    | 0.170***<br>(0.151,0.189)                                | 0.008<br>(-0.000,0.017)                                 | 0.001<br>(-0.006,0.007)                                  | -0.016***<br>(-0.019,-0.013)                              |
| Race/ethnicity                |  | -0.007***<br>(-0.010,-0.005)                | 0.020***<br>(0.013,0.028)                                | 0.004*<br>(0.001,0.008)                                 | 0.009***<br>(0.006,0.012)                                | -0.002**<br>(-0.003,-0.001)                               |
| Unknown/other                 |  | ref.                                        | ref.                                                     | ref.                                                    | ref.                                                     | ref.                                                      |
| White                         |  | 0.011***<br>(0.009,0.013)                   | -0.010**<br>(-0.017,-0.003)                              | 0.005**<br>(0.002,0.008)                                | 0.008***<br>(0.006,0.011)                                | 0.004***<br>(0.002,0.005)                                 |
| Black                         |  | -0.016***<br>(-0.018,-0.013)                | 0.086***<br>(0.077,0.095)                                | 0.011***<br>(0.006,0.015)                               | 0.010***<br>(0.007,0.014)                                | -0.008***<br>(-0.009,-0.006)                              |
| Hispanic                      |  | -0.011***<br>(-0.016,-0.007)                | 0.020*<br>(0.002,0.039)                                  | 0.002<br>(-0.007,0.010)                                 | 0.007<br>(-0.000,0.014)                                  | -0.001<br>(-0.004,0.002)                                  |
| Asian                         |  | ref.                                        | ref.                                                     | ref.                                                    | ref.                                                     | ref.                                                      |
| Comorbidities                 |  | 0.011***<br>(0.009,0.013)                   | 0.012**<br>(0.004,0.019)                                 | 0.005**<br>(0.001,0.009)                                | 0.004**<br>(0.001,0.007)                                 | 0.005***<br>(0.004,0.006)                                 |
| No diabetes                   |  | 0.029***<br>(0.027,0.031)                   | 0.008**<br>(0.002,0.014)                                 | -0.002<br>(-0.005,0.001)                                | 0.002<br>(-0.000,0.004)                                  | 0.008***<br>(0.006,0.009)                                 |
| Diabetes without CC           |  | ref.                                        | ref.                                                     | ref.                                                    | ref.                                                     | ref.                                                      |
| Diabetes with CC              |  | 0.023***<br>(0.020,0.026)                   | -0.012**<br>(-0.018,-0.005)                              | -0.003<br>(-0.006,0.000)                                | -0.003*<br>(-0.005,-0.000)                               | -0.001<br>(-0.003,0.001)                                  |
| Uncomp hypertension           |  | 0.020***<br>(0.018,0.022)                   | 0.028***<br>(0.022,0.033)                                | 0.001<br>(-0.001,0.004)                                 | -0.002<br>(-0.004,0.000)                                 | 0.007***<br>(0.006,0.009)                                 |
| Comp hypertension             |  | 0.093***<br>(0.090,0.095)                   | 0.077***<br>(0.072,0.083)                                | 0.018***<br>(0.015,0.020)                               | 0.002*<br>(0.000,0.004)                                  | 0.036***<br>(0.034,0.037)                                 |
| Coronary artery disease       |  | 0.061***<br>(0.059,0.063)                   | -0.010***<br>(-0.015,-0.005)                             | 0.015***<br>(0.013,0.018)                               | -0.007***<br>(-0.009,-0.006)                             | -0.002***<br>(-0.003,-0.001)                              |
| Congestive heart failure      |  | 0.019***<br>(0.017,0.022)                   | 0.012***<br>(0.005,0.018)                                | -0.001<br>(-0.004,0.003)                                | 0.001<br>(-0.001,0.004)                                  | 0.023***<br>(0.021,0.025)                                 |
| Chronic pulmonary diseases    |  | 0.046***<br>(0.042,0.051)                   | 0.035***<br>(0.025,0.045)                                | -0.003<br>(-0.008,0.002)                                | 0<br>(-0.004,0.004)                                      | 0.059***<br>(0.056,0.063)                                 |
| Renal failure                 |  | 0.122***<br>(0.115,0.130)                   | 0.01<br>(-0.003,0.024)                                   | 0.003<br>(-0.004,0.009)                                 | -0.010***<br>(-0.014,-0.006)                             | 0.136***<br>(0.130,0.142)                                 |
| Liver failure                 |  | 0.064***<br>(0.056,0.073)                   | -0.008<br>(-0.025,0.009)                                 | -0.001<br>(-0.009,0.007)                                | -0.010***<br>(-0.015,-0.004)                             | 0.027***<br>(0.021,0.033)                                 |
| Metastatic cancer             |  | 0.036***<br>(0.033,0.040)                   | 0.018***<br>(0.009,0.027)                                | 0<br>(-0.004,0.005)                                     | -0.003*<br>(-0.006,-0.000)                               | 0.028***<br>(0.026,0.030)                                 |
| Lymphoma                      |  | -0.008***<br>(-0.011,-0.006)                | 0.017***<br>(0.010,0.023)                                | 0.004**<br>(0.001,0.008)                                | 0.001<br>(-0.001,0.003)                                  | 0.018***<br>(0.017,0.020)                                 |
| Non-metastatic solid tumor    |  | 0.062***                                    | 0.062***                                                 | 0.005***                                                | -0.002*                                                  | 0.024***                                                  |
| Peripheral vascular disorders |  |                                             |                                                          |                                                         |                                                          |                                                           |
| Cardiac arrhythmias           |  |                                             |                                                          |                                                         |                                                          |                                                           |

## Primary analysis

|                                                          | (1)                                         | (2)                                                      | (3)                                                     | (4)                                                      | (5)                                                       |
|----------------------------------------------------------|---------------------------------------------|----------------------------------------------------------|---------------------------------------------------------|----------------------------------------------------------|-----------------------------------------------------------|
|                                                          | Inpatient stay<br>(95% confidence interval) | Inpatient stay with ICU/CCU<br>(95% confidence interval) | Inpatient stay with ARD dx<br>(95% confidence interval) | Inpatient stay with ARDS dx<br>(95% confidence interval) | Died same or following month<br>(95% confidence interval) |
| Rheumatoid arthritis/collagen vascular diseases          | 0.016***<br>(0.060,0.064)                   | -0.005<br>(0.057,0.067)                                  | -0.007**<br>(0.002,0.007)                               | 0<br>(-0.004,-0.000)                                     | 0.004***<br>(0.023,0.025)                                 |
| Coagulopathy                                             | 0.029***<br>(0.013,0.020)                   | 0.032***<br>(-0.016,0.005)                               | -0.004<br>(-0.012,-0.002)                               | 0.002<br>(-0.004,0.004)                                  | 0.035***<br>(0.002,0.006)                                 |
| Obesity                                                  | -0.002<br>(0.024,0.033)                     | 0.013***<br>(0.023,0.041)                                | 0.004<br>(-0.008,0.000)                                 | 0.009***<br>(-0.001,0.005)                               | -0.009***<br>(0.032,0.038)                                |
| Chronic/acute deep vein thrombosis or pulmonary embolism | 0.061***<br>(-0.005,0.000)                  | 0.050***<br>(0.006,0.021)                                | 0.003<br>(-0.000,0.007)                                 | 0.002<br>(0.006,0.012)                                   | 0.030***<br>(-0.010,-0.007)                               |
| Hemorrhagic or ischemic stroke                           | 0.016***<br>(0.056,0.067)                   | 0.032***<br>(0.039,0.061)                                | 0.002<br>(-0.003,0.009)                                 | -0.004**<br>(-0.003,0.006)                               | 0.043***<br>(0.026,0.034)                                 |
| Valvular disease                                         | -0.009***<br>(0.013,0.020)                  | 0.045***<br>(0.024,0.040)                                | 0.007***<br>(-0.001,0.006)                              | -0.002<br>(-0.007,-0.001)                                | 0.017***<br>(0.040,0.045)                                 |
| Constant                                                 | 0.058***<br>(-0.012,-0.006)                 | 0.310***<br>(0.038,0.052)                                | 0.020***<br>(0.003,0.010)                               | 0.034***<br>(-0.004,0.001)                               | 0.012***<br>(0.015,0.019)                                 |
| N                                                        | 1059474<br>(0.053,0.063)                    | 167330<br>(0.291,0.330)                                  | 167330<br>(0.011,0.029)                                 | 167330<br>(0.027,0.041)                                  | 1057707<br>(0.009,0.015)                                  |
| N_clust                                                  | 728455                                      | 147846                                                   | 147846                                                  | 147846                                                   | 727311                                                    |
| p                                                        | <0.001                                      | <0.001                                                   | <0.001                                                  | <0.001                                                   | <0.001                                                    |
| R-squared                                                | 0.081                                       | 0.037                                                    | 0.006                                                   | 0.008                                                    | 0.076                                                     |

## Sensitivity analysis: ACEi/ARB monotherapy

|                                           | (6)                                         | (7)                                                      | (8)                                                     | (9)                                                      | (10)                                                      |
|-------------------------------------------|---------------------------------------------|----------------------------------------------------------|---------------------------------------------------------|----------------------------------------------------------|-----------------------------------------------------------|
|                                           | Inpatient stay<br>(95% confidence interval) | Inpatient stay with ICU/CCU<br>(95% confidence interval) | Inpatient stay with ARD dx<br>(95% confidence interval) | Inpatient stay with ARDS dx<br>(95% confidence interval) | Died same or following month<br>(95% confidence interval) |
| Flu season / medication type              |                                             |                                                          |                                                         |                                                          |                                                           |
| 2017-2018 flu season                      | ref.                                        | ref.                                                     | ref.                                                    | ref.                                                     | ref.                                                      |
| 2018-2019 flu season                      | -0.001<br>(-0.004,0.002)                    | 0.008<br>(-0.002,0.018)                                  | 0.013***<br>(0.008,0.017)                               | -0.007***<br>(-0.010,-0.004)                             | 0<br>(-0.002,0.002)                                       |
| 2019-2020 flu season                      | 0.018***<br>(0.015,0.021)                   | 0.035***<br>(0.026,0.044)                                | 0.013***<br>(0.008,0.017)                               | 0.013***<br>(0.009,0.016)                                | 0.016***<br>(0.014,0.017)                                 |
| Other medications only                    | ref.                                        | ref.                                                     | ref.                                                    | ref.                                                     | ref.                                                      |
| ACEi or ARB plus/minus other medications  | -0.020***<br>(-0.023,-0.017)                | -0.004<br>(-0.014,0.006)                                 | -0.007**<br>(-0.011,-0.002)                             | -0.002<br>(-0.006,0.001)                                 | -0.010***<br>(-0.012,-0.009)                              |
| ACEi or ARB monotherapy                   | -0.016***<br>(-0.020,-0.012)                | -0.039***<br>(-0.057,-0.020)                             | -0.007<br>(-0.015,0.001)                                | -0.009**<br>(-0.015,-0.003)                              | -0.004***<br>(-0.006,-0.002)                              |
| 2018-2019 season: ACEi or ARB +/- other   | 0.004*<br>(0.000,0.008)                     | 0.004<br>(-0.009,0.018)                                  | 0.004<br>(-0.003,0.010)                                 | -0.001<br>(-0.005,0.004)                                 | -0.001<br>(-0.003,0.002)                                  |
| 2018-2019 season: ACEi or ARB monotherapy | 0.005<br>(-0.001,0.010)                     | 0.040**<br>(0.015,0.065)                                 | 0.002<br>(-0.009,0.013)                                 | 0.002<br>(-0.006,0.009)                                  | 0.001<br>(-0.002,0.004)                                   |
| 2019-2020 season: ACEi or ARB +/- other   | 0.015***<br>(0.011,0.019)                   | 0.011<br>(-0.001,0.024)                                  | 0.007*<br>(0.002,0.013)                                 | 0.008***<br>(0.003,0.013)                                | -0.001<br>(-0.004,0.001)                                  |
| 2019-2020 season: ACEi or ARB monotherapy | 0.017***<br>(0.012,0.022)                   | 0.035**<br>(0.013,0.057)                                 | 0.004<br>(-0.006,0.013)                                 | 0.012**<br>(0.004,0.020)                                 | -0.003*<br>(-0.006,-0.000)                                |
| Demographics                              |                                             |                                                          |                                                         |                                                          |                                                           |
| Female                                    | -0.016***<br>(-0.017,-0.014)                | -0.023***<br>(-0.028,-0.018)                             | 0<br>(-0.002,0.003)                                     | -0.004***<br>(-0.006,-0.002)                             | -0.011***<br>(-0.012,-0.010)                              |
| Age categories                            |                                             |                                                          |                                                         |                                                          |                                                           |
| <35                                       | -0.006*<br>(-0.012,-0.000)                  | -0.029<br>(-0.078,0.020)                                 | 0.02<br>(-0.005,0.045)                                  | -0.01<br>(-0.028,0.008)                                  | -0.001<br>(-0.003,0.001)                                  |
| 35-44                                     | -0.008***<br>(-0.012,-0.005)                | -0.028<br>(-0.056,0.000)                                 | 0.006<br>(-0.008,0.019)                                 | -0.004<br>(-0.016,0.008)                                 | 0.001<br>(-0.001,0.002)                                   |
| 45-54                                     | ref.                                        | ref.                                                     | ref.                                                    | ref.                                                     | ref.                                                      |
| 55-64                                     | 0.010***<br>(0.008,0.013)                   | 0.005<br>(-0.009,0.020)                                  | 0.001<br>(-0.005,0.008)                                 | 0.001<br>(-0.005,0.007)                                  | 0.001*<br>(0.000,0.002)                                   |
| 65-74                                     | 0.011***<br>(0.008,0.014)                   | -0.003<br>(-0.017,0.011)                                 | 0.001<br>(-0.006,0.008)                                 | -0.001<br>(-0.007,0.004)                                 | 0.009***<br>(0.007,0.010)                                 |
| 75-84                                     | 0.029***<br>(0.026,0.032)                   | -0.026***<br>(-0.041,-0.012)                             | -0.002<br>(-0.009,0.004)                                | -0.005<br>(-0.011,0.001)                                 | 0.024***<br>(0.023,0.026)                                 |
| 85+                                       | 0.045***<br>(0.041,0.049)                   | -0.072***<br>(-0.087,-0.057)                             | -0.010**<br>(-0.017,-0.003)                             | -0.014***<br>(-0.020,-0.008)                             | 0.063***<br>(0.061,0.065)                                 |
| Insurance coverage type                   |                                             |                                                          |                                                         |                                                          |                                                           |
| Medicare Advantage                        | ref.                                        | ref.                                                     | ref.                                                    | ref.                                                     | ref.                                                      |
| Commercial                                | -0.032***<br>(-0.035,-0.030)                | 0.01<br>(-0.001,0.021)                                   | 0.001<br>(-0.004,0.006)                                 | 0.003<br>(-0.002,0.007)                                  | -0.001**<br>(-0.002,-0.000)                               |
| Census region                             | -0.045**<br>(-0.075,-0.016)                 | 0.196*<br>(0.016,0.375)                                  | -0.011<br>(-0.086,0.064)                                | 0.009<br>(-0.068,0.087)                                  | -0.023*<br>(-0.044,-0.002)                                |
| New England                               | ref.                                        | ref.                                                     | ref.                                                    | ref.                                                     | ref.                                                      |
| Mid Atlantic                              | -0.008***<br>(-0.012,-0.003)                | 0.017*<br>(0.003,0.031)                                  | 0.021***<br>(0.015,0.028)                               | 0.021***<br>(0.016,0.026)                                | -0.005**<br>(-0.008,-0.002)                               |
| South Atlantic                            | -0.001<br>(-0.005,0.003)                    | 0.122***<br>(0.110,0.134)                                | 0.016***<br>(0.011,0.021)                               | 0.003<br>(-0.002,0.007)                                  | -0.016***<br>(-0.018,-0.013)                              |



Sensitivity analysis: ACEi/ARB monotherapy

|                               | (6)                                         | (7)                                                      | (8)                                                     | (9)                                                      | (10)                                                      |
|-------------------------------|---------------------------------------------|----------------------------------------------------------|---------------------------------------------------------|----------------------------------------------------------|-----------------------------------------------------------|
|                               | Inpatient stay<br>(95% confidence interval) | Inpatient stay with ICU/CCU<br>(95% confidence interval) | Inpatient stay with ARD dx<br>(95% confidence interval) | Inpatient stay with ARDS dx<br>(95% confidence interval) | Died same or following month<br>(95% confidence interval) |
| E North Central               | 0.018***<br>(0.013,0.022)                   | 0.073***<br>(0.060,0.086)                                | 0.003<br>(-0.002,0.009)                                 | 0<br>(-0.004,0.004)                                      | -0.009***<br>(-0.012,-0.007)                              |
| E South Central               | 0.011***<br>(0.007,0.016)                   | 0.070***<br>(0.056,0.085)                                | 0.018***<br>(0.011,0.024)                               | -0.001<br>(-0.006,0.004)                                 | -0.008***<br>(-0.011,-0.006)                              |
| W North Central               | 0.027***<br>(0.022,0.032)                   | 0.093***<br>(0.079,0.107)                                | 0.004<br>(-0.002,0.010)                                 | 0.006*<br>(0.001,0.011)                                  | -0.007***<br>(-0.010,-0.004)                              |
| W South Central               | 0.014***<br>(0.010,0.018)                   | 0.111***<br>(0.097,0.124)                                | 0.017***<br>(0.011,0.023)                               | 0.003<br>(-0.002,0.007)                                  | -0.011***<br>(-0.014,-0.009)                              |
| Mountain                      | -0.033***<br>(-0.037,-0.028)                | 0.122***<br>(0.103,0.141)                                | -0.007<br>(-0.015,0.000)                                | 0.008*<br>(0.001,0.016)                                  | -0.019***<br>(-0.022,-0.016)                              |
| Pacific                       | -0.002<br>(-0.007,0.004)                    | 0.170***<br>(0.151,0.189)                                | 0.008<br>(-0.000,0.017)                                 | 0.001<br>(-0.006,0.007)                                  | -0.016***<br>(-0.019,-0.013)                              |
| Race/ethnicity                | -0.007***<br>(-0.010,-0.005)                | 0.020***<br>(0.013,0.028)                                | 0.004*<br>(0.001,0.008)                                 | 0.009***<br>(0.006,0.012)                                | -0.002**<br>(-0.003,-0.001)                               |
| Unknown/other                 | ref.                                        | ref.                                                     | ref.                                                    | ref.                                                     | ref.                                                      |
| White                         | ref.                                        | ref.                                                     | ref.                                                    | ref.                                                     | ref.                                                      |
| Black                         | 0.011***<br>(0.009,0.013)                   | -0.010**<br>(-0.017,-0.003)                              | 0.005**<br>(0.002,0.008)                                | 0.008***<br>(0.006,0.011)                                | 0.004***<br>(0.003,0.005)                                 |
| Hispanic                      | -0.016***<br>(-0.018,-0.013)                | 0.086***<br>(0.077,0.095)                                | 0.011***<br>(0.006,0.015)                               | 0.010***<br>(0.007,0.014)                                | -0.008***<br>(-0.009,-0.006)                              |
| Asian                         | -0.012***<br>(-0.016,-0.007)                | 0.020*<br>(0.002,0.039)                                  | 0.002<br>(-0.007,0.010)                                 | 0.007<br>(-0.000,0.014)                                  | -0.001<br>(-0.004,0.001)                                  |
| Comorbidities                 | ref.                                        | ref.                                                     | ref.                                                    | ref.                                                     | ref.                                                      |
| No diabetes                   | ref.                                        | ref.                                                     | ref.                                                    | ref.                                                     | ref.                                                      |
| Diabetes without CC           | 0.011***<br>(0.009,0.013)                   | 0.012**<br>(0.004,0.019)                                 | 0.005**<br>(0.001,0.009)                                | 0.004**<br>(0.001,0.007)                                 | 0.005***<br>(0.004,0.006)                                 |
| Diabetes with CC              | 0.029***<br>(0.027,0.031)                   | 0.008***<br>(0.002,0.014)                                | -0.002<br>(-0.005,0.001)                                | 0.002<br>(-0.000,0.004)                                  | 0.008***<br>(0.006,0.009)                                 |
| Uncomp hypertension           | ref.                                        | ref.                                                     | ref.                                                    | ref.                                                     | ref.                                                      |
| Comp hypertension             | 0.023***<br>(0.020,0.026)                   | -0.012**<br>(-0.019,-0.005)                              | -0.003<br>(-0.006,0.000)                                | -0.003*<br>(-0.005,-0.000)                               | -0.001<br>(-0.003,0.001)                                  |
| Coronary artery disease       | 0.020***<br>(0.018,0.022)                   | 0.027***<br>(0.022,0.033)                                | 0.001<br>(-0.001,0.004)                                 | -0.002<br>(-0.004,0.000)                                 | 0.008***<br>(0.006,0.009)                                 |
| Congestive heart failure      | 0.093***<br>(0.091,0.096)                   | 0.077***<br>(0.071,0.082)                                | 0.017***<br>(0.015,0.020)                               | 0.002<br>(-0.000,0.004)                                  | 0.036***<br>(0.035,0.038)                                 |
| Chronic pulmonary diseases    | 0.061***<br>(0.059,0.063)                   | -0.010***<br>(-0.015,-0.005)                             | 0.015***<br>(0.013,0.018)                               | -0.007***<br>(-0.009,-0.006)                             | -0.002***<br>(-0.003,-0.001)                              |
| Renal failure                 | 0.019***<br>(0.017,0.022)                   | 0.012***<br>(0.005,0.018)                                | -0.001<br>(-0.004,0.003)                                | 0.001<br>(-0.001,0.003)                                  | 0.023***<br>(0.021,0.025)                                 |
| Liver failure                 | 0.046***<br>(0.042,0.051)                   | 0.035***<br>(0.025,0.045)                                | -0.003<br>(-0.008,0.002)                                | 0<br>(-0.004,0.004)                                      | 0.059***<br>(0.056,0.063)                                 |
| Metastatic cancer             | 0.122***<br>(0.115,0.130)                   | 0.01<br>(-0.003,0.024)                                   | 0.003<br>(-0.004,0.009)                                 | -0.010***<br>(-0.014,-0.006)                             | 0.136***<br>(0.130,0.142)                                 |
| Lymphoma                      | 0.064***<br>(0.056,0.073)                   | -0.008<br>(-0.025,0.009)                                 | -0.001<br>(-0.009,0.007)                                | -0.010***<br>(-0.015,-0.004)                             | 0.027***<br>(0.021,0.033)                                 |
| Non-metastatic solid tumor    | 0.036***<br>(0.033,0.040)                   | 0.018***<br>(0.009,0.027)                                | 0<br>(-0.004,0.005)                                     | -0.003*<br>(-0.006,-0.000)                               | 0.028***<br>(0.026,0.030)                                 |
| Peripheral vascular disorders | -0.008***<br>(-0.011,-0.006)                | 0.017***<br>(0.010,0.023)                                | 0.004**<br>(0.001,0.008)                                | 0.001<br>(-0.001,0.003)                                  | 0.018***<br>(0.017,0.020)                                 |
| Cardiac arrhythmias           | 0.062***                                    | 0.062***                                                 | 0.005***                                                | -0.002*                                                  | 0.024***                                                  |

Sensitivity analysis: ACEi/ARB monotherapy

1  
2  
3  
4  
5  
6  
7  
8  
9  
10  
11  
12  
13  
14  
15  
16  
17  
18  
19  
20  
21  
22  
23  
24  
25  
26  
27  
28  
29  
30  
31  
32  
33  
34  
35  
36  
37  
38  
39  
40  
41  
42  
43  
44  
45  
46  
47

|                                                          | (6)                          | (7)                         | (8)                         | (9)                         | (10)                         |
|----------------------------------------------------------|------------------------------|-----------------------------|-----------------------------|-----------------------------|------------------------------|
|                                                          | Inpatient stay               | Inpatient stay with ICU/CCU | Inpatient stay with ARD dx  | Inpatient stay with ARDS dx | Died same or following month |
|                                                          | (95% confidence interval)    | (95% confidence interval)   | (95% confidence interval)   | (95% confidence interval)   | (95% confidence interval)    |
| Rheumatoid arthritis/collagen vascular diseases          | 0.016***<br>(0.013,0.020)    | -0.005<br>(-0.016,0.006)    | -0.007**<br>(-0.012,-0.002) | 0<br>(-0.004,0.004)         | 0.004***<br>(0.002,0.006)    |
| Coagulopathy                                             | 0.029***<br>(0.024,0.033)    | 0.032***<br>(0.023,0.041)   | -0.004<br>(-0.008,0.000)    | 0.002<br>(-0.001,0.005)     | 0.035***<br>(0.032,0.038)    |
| Obesity                                                  | -0.002<br>(-0.004,0.000)     | 0.013***<br>(0.006,0.021)   | 0.004<br>(-0.000,0.007)     | 0.009***<br>(0.006,0.012)   | -0.008***<br>(-0.010,-0.007) |
| Chronic/acute deep vein thrombosis or pulmonary embolism | 0.061***<br>(0.055,0.067)    | 0.050***<br>(0.039,0.061)   | 0.003<br>(-0.003,0.009)     | 0.002<br>(-0.002,0.006)     | 0.030***<br>(0.026,0.034)    |
| Hemorrhagic or ischemic stroke                           | 0.016***<br>(0.013,0.019)    | 0.032***<br>(0.024,0.040)   | 0.002<br>(-0.001,0.006)     | -0.004**<br>(-0.007,-0.001) | 0.043***<br>(0.040,0.045)    |
| Valvular disease                                         | -0.009***<br>(-0.012,-0.006) | 0.045***<br>(0.038,0.052)   | 0.007***<br>(0.003,0.010)   | -0.002<br>(-0.004,0.001)    | 0.017***<br>(0.015,0.019)    |
| Constant                                                 | 0.058***<br>(0.053,0.063)    | 0.312***<br>(0.292,0.332)   | 0.020***<br>(0.011,0.029)   | 0.034***<br>(0.027,0.042)   | 0.012***<br>(0.009,0.015)    |
| N                                                        | 1059474                      | 167330                      | 167330                      | 167330                      | 1057707                      |
| N_clust                                                  | 728455                       | 147846                      | 147846                      | 147846                      | 727311                       |
| p                                                        | <0.001                       | <0.001                      | <0.001                      | <0.001                      | <0.001                       |
| R-squared                                                | 0.081                        | 0.037                       | 0.006                       | 0.008                       | 0.076                        |

For peer review only

Sensitivity analysis: Dropping people with comorbidities (other than hypertension)

|                                           | (11)                                        | (12)                                                     | (13)                                                    | (14)                                                     | (15)                                                      |
|-------------------------------------------|---------------------------------------------|----------------------------------------------------------|---------------------------------------------------------|----------------------------------------------------------|-----------------------------------------------------------|
|                                           | Inpatient stay<br>(95% confidence interval) | Inpatient stay with ICU/CCU<br>(95% confidence interval) | Inpatient stay with ARD dx<br>(95% confidence interval) | Inpatient stay with ARDS dx<br>(95% confidence interval) | Died same or following month<br>(95% confidence interval) |
| Flu season / medication type              |                                             |                                                          |                                                         |                                                          |                                                           |
| 2017-2018 flu season                      | ref.                                        | ref.                                                     | ref.                                                    | ref.                                                     | ref.                                                      |
| 2018-2019 flu season                      | 0.002<br>(-0.001,0.006)                     | 0.02<br>(-0.032,0.072)                                   | 0.030**<br>(0.009,0.051)                                | 0.006<br>(-0.005,0.017)                                  | 0<br>(-0.002,0.002)                                       |
| 2019-2020 flu season                      | 0.032***<br>(0.028,0.035)                   | 0.068**<br>(0.024,0.111)                                 | 0.029***<br>(0.014,0.045)                               | 0.052***<br>(0.039,0.065)                                | 0.007***<br>(0.005,0.009)                                 |
| Other medications only                    | ref.                                        | ref.                                                     | ref.                                                    | ref.                                                     | ref.                                                      |
| ACEi or ARB plus/minus other medications  | -0.006***<br>(-0.009,-0.003)                | -0.001<br>(-0.049,0.046)                                 | 0.009<br>(-0.008,0.026)                                 | 0.003<br>(-0.007,0.013)                                  | -0.003***<br>(-0.004,-0.001)                              |
| ACEi or ARB monotherapy                   |                                             |                                                          |                                                         |                                                          |                                                           |
| 2018-2019 season: ACEi or ARB +- other    | -0.003<br>(-0.007,0.001)                    | 0.004<br>(-0.062,0.071)                                  | -0.013<br>(-0.041,0.014)                                | 0.001<br>(-0.015,0.017)                                  | 0.001<br>(-0.001,0.003)                                   |
| 2018-2019 season: ACEi or ARB monotherapy |                                             |                                                          |                                                         |                                                          |                                                           |
| 2019-2020 season: ACEi or ARB +/- other   | -0.001<br>(-0.006,0.003)                    | 0.05<br>(-0.006,0.106)                                   | -0.022*<br>(-0.043,-0.001)                              | -0.001<br>(-0.019,0.016)                                 | -0.001<br>(-0.003,0.001)                                  |
| 2019-2020 season: ACEi or ARB monotherapy |                                             |                                                          |                                                         |                                                          |                                                           |
| Demographics                              |                                             |                                                          |                                                         |                                                          |                                                           |
| Female                                    | -0.010***<br>(-0.012,-0.008)                | -0.025*<br>(-0.048,-0.003)                               | -0.01<br>(-0.019,0.000)                                 | -0.008<br>(-0.018,0.002)                                 | -0.003***<br>(-0.004,-0.002)                              |
| Age categories                            |                                             |                                                          |                                                         |                                                          |                                                           |
| <35                                       | -0.013***<br>(-0.017,-0.010)                | -0.125<br>(-0.286,0.037)                                 | 0.089<br>(-0.025,0.202)                                 | -0.017<br>(-0.074,0.040)                                 | -0.001**<br>(-0.002,-0.000)                               |
| 35-44                                     | -0.007***<br>(-0.009,-0.004)                | -0.151***<br>(-0.229,-0.074)                             | 0.014<br>(-0.026,0.055)                                 | -0.022<br>(-0.053,0.009)                                 | -0.001<br>(-0.001,0.000)                                  |
| 45-54                                     | ref.                                        | ref.                                                     | ref.                                                    | ref.                                                     | ref.                                                      |
| 55-64                                     | 0.003**<br>(0.001,0.006)                    | -0.041<br>(-0.091,0.009)                                 | -0.004<br>(-0.027,0.018)                                | 0.006<br>(-0.018,0.029)                                  | 0.001***<br>(0.001,0.002)                                 |
| 65-74                                     | 0.006***<br>(0.003,0.009)                   | -0.056*<br>(-0.109,-0.003)                               | -0.017<br>(-0.041,0.008)                                | 0.009<br>(-0.015,0.032)                                  | 0.001*<br>(0.000,0.002)                                   |
| 75-84                                     | 0.028***<br>(0.024,0.032)                   | -0.077**<br>(-0.132,-0.022)                              | -0.011<br>(-0.037,0.014)                                | 0.005<br>(-0.019,0.029)                                  | 0.008***<br>(0.007,0.010)                                 |
| 85+                                       | 0.074***<br>(0.068,0.079)                   | -0.139***<br>(-0.196,-0.083)                             | -0.022<br>(-0.048,0.004)                                | -0.007<br>(-0.032,0.017)                                 | 0.036***<br>(0.032,0.039)                                 |
| Insurance coverage type                   |                                             |                                                          |                                                         |                                                          |                                                           |
| Medicare Advantage                        | ref.                                        | ref.                                                     | ref.                                                    | ref.                                                     | ref.                                                      |
| Commercial                                | -0.013***<br>(-0.015,-0.010)                | -0.043*<br>(-0.083,-0.002)                               | -0.01<br>(-0.028,0.009)                                 | 0.006<br>(-0.011,0.024)                                  | -0.004***<br>(-0.005,-0.003)                              |
| Census region                             |                                             |                                                          |                                                         |                                                          |                                                           |
| Unknown/other                             | -0.034***<br>(-0.053,-0.014)                | 0.755***<br>(0.693,0.816)                                | -0.025*<br>(-0.050,-0.000)                              | -0.062***<br>(-0.089,-0.035)                             | 0.008<br>(-0.018,0.034)                                   |
| New England                               | ref.                                        | ref.                                                     | ref.                                                    | ref.                                                     | ref.                                                      |
| Mid Atlantic                              | -0.002<br>(-0.007,0.004)                    | 0.065*<br>(0.008,0.123)                                  | 0.015<br>(-0.008,0.038)                                 | 0.025<br>(-0.003,0.053)                                  | 0.002<br>(-0.001,0.005)                                   |
| South Atlantic                            | -0.004<br>(-0.009,0.001)                    | 0.164***<br>(0.113,0.214)                                | 0.012<br>(-0.007,0.032)                                 | -0.009<br>(-0.032,0.014)                                 | -0.001<br>(-0.004,0.001)                                  |

## Sensitivity analysis: Dropping people with comorbidities (other than hypertension)

|                                 | (11)                                        | (12)                                                     | (13)                                                    | (14)                                                     | (15)                                                      |
|---------------------------------|---------------------------------------------|----------------------------------------------------------|---------------------------------------------------------|----------------------------------------------------------|-----------------------------------------------------------|
|                                 | Inpatient stay<br>(95% confidence interval) | Inpatient stay with ICU/CCU<br>(95% confidence interval) | Inpatient stay with ARD dx<br>(95% confidence interval) | Inpatient stay with ARDS dx<br>(95% confidence interval) | Died same or following month<br>(95% confidence interval) |
| E North Central                 | 0.007**<br>(0.002,0.013)                    | 0.111***<br>(0.058,0.165)                                | 0.018<br>(-0.003,0.039)                                 | 0<br>(-0.024,0.024)                                      | 0<br>(-0.003,0.002)                                       |
| E South Central                 | 0.001<br>(-0.005,0.007)                     | 0.116***<br>(0.055,0.176)                                | 0.01<br>(-0.014,0.034)                                  | -0.004<br>(-0.030,0.023)                                 | -0.001<br>(-0.003,0.002)                                  |
| W North Central                 | 0.009**<br>(0.003,0.015)                    | 0.124***<br>(0.063,0.184)                                | 0.021<br>(-0.004,0.046)                                 | -0.002<br>(-0.028,0.025)                                 | 0.002<br>(-0.001,0.004)                                   |
| W South Central                 | 0.001<br>(-0.004,0.007)                     | 0.142***<br>(0.086,0.199)                                | 0.025*<br>(0.002,0.049)                                 | 0.007<br>(-0.019,0.034)                                  | 0<br>(-0.002,0.003)                                       |
| Mountain                        | -0.005<br>(-0.011,0.001)                    | 0.161***<br>(0.087,0.235)                                | -0.005<br>(-0.031,0.020)                                | 0.019<br>(-0.017,0.055)                                  | -0.002<br>(-0.005,0.001)                                  |
| Pacific                         | 0<br>(-0.007,0.006)                         | 0.173***<br>(0.093,0.253)                                | -0.004<br>(-0.032,0.024)                                | -0.008<br>(-0.041,0.025)                                 | -0.003<br>(-0.005,0.000)                                  |
| Race/ethnicity<br>Unknown/other | 0.001<br>(-0.002,0.004)                     | 0.056**<br>(0.022,0.089)                                 | 0.002<br>(-0.012,0.016)                                 | 0.009<br>(-0.006,0.023)                                  | 0<br>(-0.001,0.001)                                       |
| White                           | ref.                                        | ref.                                                     | ref.                                                    | ref.                                                     | ref.                                                      |
| Black                           | 0.008***<br>(0.006,0.011)                   | 0<br>(-0.031,0.032)                                      | 0.003<br>(-0.010,0.016)                                 | 0.01<br>(-0.003,0.023)                                   | 0.001<br>(-0.000,0.002)                                   |
| Hispanic                        | -0.001<br>(-0.004,0.001)                    | 0.092***<br>(0.054,0.130)                                | 0.016<br>(-0.001,0.034)                                 | 0.035***<br>(0.015,0.055)                                | -0.001*<br>(-0.003,-0.000)                                |
| Asian                           | -0.007**<br>(-0.011,-0.002)                 | 0.029<br>(-0.045,0.103)                                  | -0.018<br>(-0.042,0.007)                                | 0.018<br>(-0.018,0.055)                                  | -0.002<br>(-0.004,0.000)                                  |
| Comorbidities<br>No diabetes    |                                             |                                                          |                                                         |                                                          |                                                           |
| Diabetes without CC             |                                             |                                                          |                                                         |                                                          |                                                           |
| Diabetes with CC                |                                             |                                                          |                                                         |                                                          |                                                           |
| Uncomp hypertension             | ref.                                        | ref.                                                     | ref.                                                    | ref.                                                     | ref.                                                      |
| Comp hypertension               | 0.014***<br>(0.007,0.021)                   | -0.009<br>(-0.068,0.050)                                 | -0.009<br>(-0.032,0.013)                                | -0.017<br>(-0.036,0.003)                                 | 0.006**<br>(0.002,0.010)                                  |
| Coronary artery disease         |                                             |                                                          |                                                         |                                                          |                                                           |
| Congestive heart failure        |                                             |                                                          |                                                         |                                                          |                                                           |
| Chronic pulmonary diseases      |                                             |                                                          |                                                         |                                                          |                                                           |
| Renal failure                   |                                             |                                                          |                                                         |                                                          |                                                           |
| Liver failure                   |                                             |                                                          |                                                         |                                                          |                                                           |
| Metastatic cancer               |                                             |                                                          |                                                         |                                                          |                                                           |
| Lymphoma                        |                                             |                                                          |                                                         |                                                          |                                                           |
| Non-metastatic solid tumor      |                                             |                                                          |                                                         |                                                          |                                                           |
| Peripheral vascular disorders   |                                             |                                                          |                                                         |                                                          |                                                           |
| Cardiac arrhythmias             |                                             |                                                          |                                                         |                                                          |                                                           |

**Sensitivity analysis: Dropping people with comorbidities (other than hypertension)**

|                                                          | (11)                                        | (12)                                                     | (13)                                                    | (14)                                                     | (15)                                                      |
|----------------------------------------------------------|---------------------------------------------|----------------------------------------------------------|---------------------------------------------------------|----------------------------------------------------------|-----------------------------------------------------------|
|                                                          | Inpatient stay<br>(95% confidence interval) | Inpatient stay with ICU/CCU<br>(95% confidence interval) | Inpatient stay with ARD dx<br>(95% confidence interval) | Inpatient stay with ARDS dx<br>(95% confidence interval) | Died same or following month<br>(95% confidence interval) |
| Rheumatoid arthritis/collagen vascular diseases          |                                             |                                                          |                                                         |                                                          |                                                           |
| Coagulopathy                                             |                                             |                                                          |                                                         |                                                          |                                                           |
| Obesity                                                  |                                             |                                                          |                                                         |                                                          |                                                           |
| Chronic/acute deep vein thrombosis or pulmonary embolism |                                             |                                                          |                                                         |                                                          |                                                           |
| Hemorrhagic or ischemic stroke                           |                                             |                                                          |                                                         |                                                          |                                                           |
| Valvular disease                                         |                                             |                                                          |                                                         |                                                          |                                                           |
| Constant                                                 | 0.027***<br>(0.020,0.033)                   | 0.268***<br>(0.190,0.347)                                | 0.027<br>(-0.003,0.058)                                 | 0.006<br>(-0.026,0.038)                                  | 0.006***<br>(0.003,0.009)                                 |
| N                                                        | 200778                                      | 7696                                                     | 7696                                                    | 7696                                                     | 200508                                                    |
| N_clust                                                  | 175494                                      | 7647                                                     | 7647                                                    | 7647                                                     | 175251                                                    |
| p                                                        | <0.001                                      |                                                          |                                                         |                                                          | <0.001                                                    |
| R-squared                                                | 0.022                                       | 0.033                                                    | 0.007                                                   | 0.023                                                    | 0.015                                                     |

For peer review only

## Sensitivity analysis: limiting analysis to strict flu season (dropping summer months)

|                                           | (16)                                        | (17)                                                     | (18)                                                    | (19)                                                     | (20)                                                      |
|-------------------------------------------|---------------------------------------------|----------------------------------------------------------|---------------------------------------------------------|----------------------------------------------------------|-----------------------------------------------------------|
|                                           | Inpatient stay<br>(95% confidence interval) | Inpatient stay with ICU/CCU<br>(95% confidence interval) | Inpatient stay with ARD dx<br>(95% confidence interval) | Inpatient stay with ARDS dx<br>(95% confidence interval) | Died same or following month<br>(95% confidence interval) |
| Flu season / medication type              |                                             |                                                          |                                                         |                                                          |                                                           |
| 2017-2018 flu season                      | ref.                                        | ref.                                                     | ref.                                                    | ref.                                                     | ref.                                                      |
| 2018-2019 flu season                      | 0<br>(-0.004,0.003)                         | 0.009<br>(-0.002,0.019)                                  | 0.017***<br>(0.012,0.022)                               | -0.007***<br>(-0.010,-0.003)                             | 0<br>(-0.002,0.002)                                       |
| 2019-2020 flu season                      | 0.003*<br>(0.000,0.007)                     | 0.030***<br>(0.020,0.041)                                | 0.017***<br>(0.011,0.022)                               | 0.010***<br>(0.006,0.014)                                | 0.017***<br>(0.015,0.020)                                 |
| Other medications only                    | ref.                                        | ref.                                                     | ref.                                                    | ref.                                                     | ref.                                                      |
| ACEi or ARB plus/minus other medications  | -0.016***<br>(-0.019,-0.013)                | -0.01<br>(-0.021,0.000)                                  | -0.007**<br>(-0.011,-0.002)                             | -0.003<br>(-0.006,0.001)                                 | -0.009***<br>(-0.010,-0.007)                              |
| ACEi or ARB monotherapy                   |                                             |                                                          |                                                         |                                                          |                                                           |
| 2018-2019 season: ACEi or ARB +/- other   | 0.002<br>(-0.002,0.006)                     | 0.01<br>(-0.004,0.025)                                   | 0.001<br>(-0.006,0.008)                                 | 0<br>(-0.005,0.004)                                      | 0<br>(-0.003,0.002)                                       |
| 2018-2019 season: ACEi or ARB monotherapy |                                             |                                                          |                                                         |                                                          |                                                           |
| 2019-2020 season: ACEi or ARB +/- other   | 0.008***<br>(0.004,0.012)                   | 0.012<br>(-0.003,0.026)                                  | 0.008*<br>(0.001,0.014)                                 | 0.008**<br>(0.002,0.013)                                 | -0.005***<br>(-0.008,-0.002)                              |
| 2019-2020 season: ACEi or ARB monotherapy |                                             |                                                          |                                                         |                                                          |                                                           |
| Demographics                              |                                             |                                                          |                                                         |                                                          |                                                           |
| Female                                    | -0.011***<br>(-0.012,-0.009)                | -0.024***<br>(-0.030,-0.017)                             | 0.001<br>(-0.002,0.004)                                 | -0.001<br>(-0.003,0.001)                                 | -0.009***<br>(-0.010,-0.008)                              |
| Age categories                            |                                             |                                                          |                                                         |                                                          |                                                           |
| <35                                       | 0<br>(-0.006,0.006)                         | -0.051<br>(-0.111,0.009)                                 | 0.012<br>(-0.020,0.044)                                 | -0.014<br>(-0.035,0.006)                                 | -0.001<br>(-0.003,0.001)                                  |
| 35-44                                     | -0.005**<br>(-0.009,-0.002)                 | -0.027<br>(-0.063,0.009)                                 | 0.005<br>(-0.013,0.023)                                 | -0.008<br>(-0.022,0.006)                                 | 0.001<br>(-0.000,0.002)                                   |
| 45-54                                     | ref.                                        | ref.                                                     | ref.                                                    | ref.                                                     | ref.                                                      |
| 55-64                                     | 0.009***<br>(0.006,0.012)                   | 0.005<br>(-0.014,0.023)                                  | 0<br>(-0.009,0.009)                                     | -0.002<br>(-0.009,0.005)                                 | 0<br>(-0.001,0.001)                                       |
| 65-74                                     | 0.009***<br>(0.006,0.012)                   | -0.009<br>(-0.027,0.009)                                 | -0.002<br>(-0.011,0.007)                                | -0.003<br>(-0.010,0.004)                                 | 0.006***<br>(0.005,0.008)                                 |
| 75-84                                     | 0.027***<br>(0.023,0.030)                   | -0.033***<br>(-0.051,-0.015)                             | -0.005<br>(-0.013,0.004)                                | -0.007<br>(-0.014,0.000)                                 | 0.022***<br>(0.020,0.023)                                 |
| 85+                                       | 0.049***<br>(0.045,0.053)                   | -0.078***<br>(-0.097,-0.059)                             | -0.012*<br>(-0.021,-0.003)                              | -0.015***<br>(-0.022,-0.008)                             | 0.062***<br>(0.060,0.065)                                 |
| Insurance coverage type                   |                                             |                                                          |                                                         |                                                          |                                                           |
| Medicare Advantage                        | ref.                                        | ref.                                                     | ref.                                                    | ref.                                                     | ref.                                                      |
| Commercial                                | -0.028***<br>(-0.030,-0.025)                | 0.006<br>(-0.007,0.019)                                  | 0.002<br>(-0.005,0.008)                                 | 0.004<br>(-0.001,0.009)                                  | 0.001<br>(-0.000,0.002)                                   |
| Census region                             |                                             |                                                          |                                                         |                                                          |                                                           |
| Unknown/other                             | -0.035<br>(-0.071,0.000)                    | 0.219*<br>(0.012,0.426)                                  | -0.003<br>(-0.099,0.094)                                | 0.016<br>(-0.085,0.117)                                  | -0.024*<br>(-0.048,-0.000)                                |
| New England                               | ref.                                        | ref.                                                     | ref.                                                    | ref.                                                     | ref.                                                      |
| Mid Atlantic                              | 0<br>(-0.005,0.005)                         | 0.018*<br>(0.002,0.035)                                  | 0.021***<br>(0.014,0.029)                               | 0.022***<br>(0.015,0.028)                                | 0.002<br>(-0.001,0.006)                                   |
| South Atlantic                            | -0.012***<br>(-0.017,-0.008)                | 0.121***<br>(0.107,0.135)                                | 0.014***<br>(0.007,0.020)                               | -0.004<br>(-0.009,0.001)                                 | -0.019***<br>(-0.022,-0.016)                              |

Sensitivity analysis: limiting analysis to strict flu season (dropping summer months)

|                               | (16)                                        | (17)                                                     | (18)                                                    | (19)                                                     | (20)                                                      |
|-------------------------------|---------------------------------------------|----------------------------------------------------------|---------------------------------------------------------|----------------------------------------------------------|-----------------------------------------------------------|
|                               | Inpatient stay<br>(95% confidence interval) | Inpatient stay with ICU/CCU<br>(95% confidence interval) | Inpatient stay with ARD dx<br>(95% confidence interval) | Inpatient stay with ARDS dx<br>(95% confidence interval) | Died same or following month<br>(95% confidence interval) |
| E North Central               | 0.008***<br>(0.003,0.013)                   | 0.073***<br>(0.058,0.089)                                | 0.004<br>(-0.003,0.011)                                 | -0.008**<br>(-0.013,-0.002)                              | -0.012***<br>(-0.015,-0.009)                              |
| E South Central               | -0.006*<br>(-0.011,-0.001)                  | 0.069***<br>(0.051,0.087)                                | 0.015***<br>(0.007,0.023)                               | -0.010**<br>(-0.016,-0.004)                              | -0.014***<br>(-0.017,-0.010)                              |
| W North Central               | 0.013***<br>(0.008,0.018)                   | 0.091***<br>(0.074,0.109)                                | 0.003<br>(-0.005,0.011)                                 | -0.004<br>(-0.010,0.002)                                 | -0.012***<br>(-0.015,-0.009)                              |
| W South Central               | -0.002<br>(-0.007,0.002)                    | 0.100***<br>(0.083,0.116)                                | 0.016***<br>(0.008,0.024)                               | -0.008**<br>(-0.014,-0.003)                              | -0.017***<br>(-0.020,-0.014)                              |
| Mountain                      | -0.040***<br>(-0.046,-0.035)                | 0.115***<br>(0.091,0.138)                                | -0.009<br>(-0.019,0.001)                                | -0.006<br>(-0.014,0.002)                                 | -0.020***<br>(-0.024,-0.017)                              |
| Pacific                       | -0.008*<br>(-0.014,-0.001)                  | 0.180***<br>(0.158,0.203)                                | 0.005<br>(-0.006,0.015)                                 | -0.006<br>(-0.014,0.002)                                 | -0.017***<br>(-0.021,-0.013)                              |
| Race/ethnicity                |                                             |                                                          |                                                         |                                                          |                                                           |
| Unknown/other                 | -0.007***<br>(-0.010,-0.005)                | 0.013*<br>(0.003,0.023)                                  | 0.003<br>(-0.002,0.009)                                 | 0.005**<br>(0.001,0.009)                                 | 0<br>(-0.001,0.002)                                       |
| White                         | ref.                                        | ref.                                                     | ref.                                                    | ref.                                                     | ref.                                                      |
| Black                         | 0.011***<br>(0.009,0.014)                   | -0.012**<br>(-0.021,-0.004)                              | 0.005*<br>(0.000,0.009)                                 | 0.010***<br>(0.007,0.014)                                | 0.004***<br>(0.002,0.005)                                 |
| Hispanic                      | -0.015***<br>(-0.018,-0.013)                | 0.079***<br>(0.068,0.090)                                | 0.010***<br>(0.004,0.015)                               | 0.007**<br>(0.003,0.011)                                 | -0.008***<br>(-0.010,-0.007)                              |
| Asian                         | -0.011***<br>(-0.016,-0.005)                | 0.005<br>(-0.017,0.027)                                  | 0.002<br>(-0.009,0.012)                                 | 0.006<br>(-0.002,0.015)                                  | -0.002<br>(-0.005,0.001)                                  |
| Comorbidities                 |                                             |                                                          |                                                         |                                                          |                                                           |
| No diabetes                   | ref.                                        | ref.                                                     | ref.                                                    | ref.                                                     | ref.                                                      |
| Diabetes without CC           | 0.006***<br>(0.004,0.009)                   | 0.012*<br>(0.003,0.022)                                  | 0.004<br>(-0.000,0.009)                                 | 0.003<br>(-0.001,0.006)                                  | 0.004***<br>(0.003,0.005)                                 |
| Diabetes with CC              | 0.026***<br>(0.024,0.028)                   | 0.006<br>(-0.001,0.013)                                  | -0.003<br>(-0.006,0.001)                                | 0<br>(-0.002,0.003)                                      | 0.007***<br>(0.006,0.008)                                 |
| Uncomp hypertension           | ref.                                        | ref.                                                     | ref.                                                    | ref.                                                     | ref.                                                      |
| Comp hypertension             | 0.023***<br>(0.020,0.026)                   | -0.009*<br>(-0.018,-0.000)                               | -0.004<br>(-0.008,0.000)                                | 0<br>(-0.003,0.003)                                      | -0.001<br>(-0.003,0.001)                                  |
| Coronary artery disease       | 0.018***<br>(0.016,0.020)                   | 0.031***<br>(0.025,0.038)                                | 0<br>(-0.003,0.004)                                     | -0.001<br>(-0.003,0.001)                                 | 0.006***<br>(0.004,0.007)                                 |
| Congestive heart failure      | 0.101***<br>(0.098,0.104)                   | 0.078***<br>(0.072,0.085)                                | 0.018***<br>(0.015,0.022)                               | 0.004***<br>(0.002,0.007)                                | 0.038***<br>(0.037,0.040)                                 |
| Chronic pulmonary diseases    | 0.074***<br>(0.072,0.076)                   | -0.010**<br>(-0.016,-0.004)                              | 0.015***<br>(0.012,0.018)                               | -0.005***<br>(-0.007,-0.002)                             | 0<br>(-0.001,0.001)                                       |
| Renal failure                 | 0.019***<br>(0.016,0.022)                   | 0.012**<br>(0.004,0.020)                                 | 0<br>(-0.004,0.004)                                     | 0.001<br>(-0.002,0.004)                                  | 0.023***<br>(0.021,0.025)                                 |
| Liver failure                 | 0.041***<br>(0.036,0.047)                   | 0.037***<br>(0.024,0.050)                                | 0<br>(-0.006,0.007)                                     | 0.004<br>(-0.001,0.009)                                  | 0.057***<br>(0.053,0.062)                                 |
| Metastatic cancer             | 0.118***<br>(0.109,0.127)                   | 0.007<br>(-0.010,0.023)                                  | 0.001<br>(-0.007,0.010)                                 | -0.008**<br>(-0.013,-0.003)                              | 0.138***<br>(0.131,0.146)                                 |
| Lymphoma                      | 0.064***<br>(0.054,0.073)                   | -0.009<br>(-0.030,0.012)                                 | -0.001<br>(-0.011,0.009)                                | -0.009**<br>(-0.015,-0.002)                              | 0.023***<br>(0.016,0.029)                                 |
| Non-metastatic solid tumor    | 0.038***<br>(0.034,0.042)                   | 0.021***<br>(0.010,0.032)                                | 0.002<br>(-0.003,0.008)                                 | -0.004*<br>(-0.007,-0.000)                               | 0.030***<br>(0.027,0.033)                                 |
| Peripheral vascular disorders | -0.001<br>(-0.004,0.002)                    | 0.016***<br>(0.008,0.024)                                | 0.005*<br>(0.001,0.009)                                 | 0.004**<br>(0.001,0.007)                                 | 0.023***<br>(0.021,0.025)                                 |
| Cardiac arrhythmias           | 0.063***                                    | 0.065***                                                 | 0.005**                                                 | -0.001                                                   | 0.023***                                                  |

1  
2  
3  
4  
5  
6  
7  
8  
9  
10  
11  
12  
13  
14  
15  
16  
17  
18  
19  
20  
21  
22  
23  
24  
25  
26  
27  
28  
29  
30  
31  
32  
33  
34  
35  
36  
37  
38  
39  
40  
41  
42  
43  
44  
45  
46  
47

Sensitivity analysis: limiting analysis to strict flu season (dropping summer months)

|                                                          | (16)                        | (17)                        | (18)                       | (19)                        | (20)                         |
|----------------------------------------------------------|-----------------------------|-----------------------------|----------------------------|-----------------------------|------------------------------|
|                                                          | Inpatient stay              | Inpatient stay with ICU/CCU | Inpatient stay with ARD dx | Inpatient stay with ARDS dx | Died same or following month |
|                                                          | (95% confidence interval)   | (95% confidence interval)   | (95% confidence interval)  | (95% confidence interval)   | (95% confidence interval)    |
| Rheumatoid arthritis/collagen vascular diseases          | 0.015***<br>(0.061,0.066)   | -0.013<br>(0.058,0.071)     | -0.008*<br>(0.002,0.008)   | -0.001<br>(-0.003,0.002)    | 0.002<br>(0.021,0.025)       |
| Coagulopathy                                             | 0.035***<br>(0.010,0.019)   | 0.032***<br>(-0.026,0.001)  | -0.002<br>(-0.014,-0.002)  | 0.001<br>(-0.005,0.004)     | 0.039***<br>(-0.000,0.005)   |
| Obesity                                                  | -0.002<br>(0.030,0.041)     | 0.016***<br>(0.021,0.043)   | 0.004<br>(-0.008,0.003)    | 0.008***<br>(-0.004,0.005)  | -0.008***<br>(0.035,0.043)   |
| Chronic/acute deep vein thrombosis or pulmonary embolism | 0.053***<br>(-0.005,0.000)  | 0.052***<br>(0.007,0.026)   | 0.005<br>(-0.001,0.009)    | 0.002<br>(0.005,0.012)      | 0.026***<br>(-0.010,-0.006)  |
| Hemorrhagic or ischemic stroke                           | 0.018***<br>(0.046,0.061)   | 0.030***<br>(0.038,0.066)   | 0.005<br>(-0.003,0.012)    | -0.003<br>(-0.004,0.007)    | 0.044***<br>(0.021,0.031)    |
| Valvular disease                                         | -0.008***<br>(0.014,0.022)  | 0.053***<br>(0.020,0.040)   | 0.008***<br>(-0.000,0.010) | -0.001<br>(-0.007,0.000)    | 0.016***<br>(0.041,0.047)    |
| Constant                                                 | 0.057***<br>(-0.012,-0.005) | 0.314***<br>(0.044,0.061)   | 0.022***<br>(0.003,0.012)  | 0.037***<br>(-0.004,0.003)  | 0.013***<br>(0.014,0.019)    |
| N                                                        | 738240<br>(0.051,0.063)     | 106917<br>(0.290,0.338)     | 106917<br>(0.010,0.033)    | 106917<br>(0.028,0.046)     | 737059<br>(0.010,0.017)      |
| N_clust                                                  | 556579                      | 97383                       | 97383                      | 97383                       | 555729                       |
| p                                                        | <0.001                      | <0.001                      | <0.001                     | <0.001                      | <0.001                       |
| R-squared                                                | 0.094                       | 0.039                       | 0.007                      | 0.008                       | 0.082                        |

For peer review only



**Primary analysis**

|                                                                                    | (1)                          | (2)                         | (3)                         | (4)                          | (5)                          |
|------------------------------------------------------------------------------------|------------------------------|-----------------------------|-----------------------------|------------------------------|------------------------------|
|                                                                                    | Inpatient stay               | Inpatient stay with ICU/CCU | Inpatient stay with ARD dx  | Inpatient stay with ARDS dx  | Died same or following month |
| <b>Key coefficient estimates</b>                                                   |                              |                             |                             |                              |                              |
| <b>Season</b>                                                                      |                              |                             |                             |                              |                              |
| 2017-2018 flu season                                                               | ref.                         | ref.                        | ref.                        | ref.                         | ref.                         |
| 2018-2019 flu season                                                               | -0.001<br>(-0.004,0.002)     | 0.008<br>(-0.002,0.018)     | 0.013***<br>(0.008,0.017)   | -0.007***<br>(-0.010,-0.004) | 0.000<br>(-0.002,0.002)      |
| 2019-2020 flu season                                                               | 0.018***<br>(0.015,0.021)    | 0.035***<br>(0.026,0.044)   | 0.013***<br>(0.008,0.017)   | 0.013***<br>(0.009,0.016)    | 0.016***<br>(0.014,0.017)    |
| <b>HTN medication group</b>                                                        |                              |                             |                             |                              |                              |
| Other medications only                                                             | ref.                         | ref.                        | ref.                        | ref.                         | ref.                         |
| ACEi or ARB plus/minus other medications                                           | -0.019***<br>(-0.022,-0.016) | -0.009<br>(-0.019,0.001)    | -0.007**<br>(-0.011,-0.002) | -0.003<br>(-0.007,0.000)     | -0.009***<br>(-0.011,-0.008) |
| ACEi or ARB monotherapy                                                            | N/A                          | N/A                         | N/A                         | N/A                          | N/A                          |
| <b>Season/medication interactions</b>                                              |                              |                             |                             |                              |                              |
| 2018-2019 season: ACEi or ARB +- other                                             | 0.004*<br>(0.001,0.008)      | 0.01<br>(-0.004,0.023)      | 0.004<br>(-0.003,0.010)     | 0<br>(-0.004,0.004)          | 0<br>(-0.002,0.002)          |
| 2018-2019 season: ACEi or ARB monotherapy                                          | N/A                          | N/A                         | N/A                         | N/A                          | N/A                          |
| 2019-2020 season: ACEi or ARB +/- other                                            | 0.015***<br>(0.012,0.019)    | 0.015*<br>(0.003,0.027)     | 0.007*<br>(0.001,0.012)     | 0.009***<br>(0.004,0.013)    | -0.002<br>(-0.004,0.001)     |
| 2019-2020 season: ACEi or ARB monotherapy                                          | N/A                          | N/A                         | N/A                         | N/A                          | N/A                          |
| Note: p-value for coefficients is for the null hypothesis that the coefficient = 0 |                              |                             |                             |                              |                              |
| <b>Marginal effects/predicted probability</b>                                      |                              |                             |                             |                              |                              |
| <b>Other hypertension medications only</b>                                         |                              |                             |                             |                              |                              |
| 2017/18                                                                            | 0.179<br>(0.177,0.181)       | 0.482<br>(0.474,0.489)      | 0.053<br>(0.050,0.056)      | 0.030<br>(0.028,0.033)       | 0.064<br>(0.062,0.065)       |
| 2018/19                                                                            | 0.178<br>(0.176,0.180)       | 0.490<br>(0.483,0.496)      | 0.066<br>(0.062,0.069)      | 0.023<br>(0.021,0.025)       | 0.064<br>(0.063,0.065)       |
| 2019/20                                                                            | 0.196<br>(0.195,0.198)       | 0.516<br>(0.511,0.521)      | 0.066<br>(0.063,0.068)      | 0.043<br>(0.041,0.045)       | 0.080<br>(0.078,0.081)       |

## Primary analysis

|                                                 | (1)                       | (2)                         | (3)                        | (4)                         | (5)                          |
|-------------------------------------------------|---------------------------|-----------------------------|----------------------------|-----------------------------|------------------------------|
|                                                 | Inpatient stay            | Inpatient stay with ICU/CCU | Inpatient stay with ARD dx | Inpatient stay with ARDS dx | Died same or following month |
| <b>ACEi or ARB plus/minus other medications</b> |                           |                             |                            |                             |                              |
| 2017/18                                         | 0.125<br>(0.124,0.127)    | 0.463<br>(0.456,0.470)      | 0.045<br>(0.042,0.048)     | 0.029<br>(0.027,0.031)      | 0.035<br>(0.034,0.035)       |
| 2018/19                                         | 0.128<br>(0.127,0.130)    | 0.481<br>(0.475,0.487)      | 0.061<br>(0.058,0.064)     | 0.021<br>(0.020,0.023)      | 0.034<br>(0.034,0.035)       |
| 2019/20                                         | 0.158<br>(0.157,0.160)    | 0.512<br>(0.508,0.517)      | 0.064<br>(0.062,0.066)     | 0.050<br>(0.048,0.052)      | 0.049<br>(0.048,0.049)       |
| <b>ACEi or ARB monotherapy</b>                  |                           |                             |                            |                             |                              |
| 2017/18                                         | N/A                       | N/A                         | N/A                        | N/A                         | N/A                          |
| 2018/19                                         | N/A                       | N/A                         | N/A                        | N/A                         | N/A                          |
| 2019/20                                         | N/A                       | N/A                         | N/A                        | N/A                         | N/A                          |
| <b>Risk ratios of marginal effects</b>          |                           |                             |                            |                             |                              |
| <b>Other hypertension medications only</b>      |                           |                             |                            |                             |                              |
| 2018/19 season vs. 2017/18                      | 0.994<br>(0.977,1.011)    | 1.017<br>(0.996,1.038)      | 1.236***<br>(1.136,1.337)  | 0.759***<br>(0.668,0.850)   | 0.999<br>(0.969,1.030)       |
| 2019/20 season vs. 2017/18                      | 1.099***<br>(1.081,1.116) | 1.072***<br>(1.053,1.092)   | 1.238***<br>(1.147,1.330)  | 1.414***<br>(1.278,1.550)   | 1.244***<br>(1.210,1.278)    |
| <b>ACEi or ARB plus/minus other medications</b> |                           |                             |                            |                             |                              |
| 2018/19 season vs. 2017/18                      | 1.025**<br>(1.009,1.042)  | 1.039***<br>(1.019,1.058)   | 1.360***<br>(1.251,1.469)  | 0.739***<br>(0.656,0.822)   | 0.993<br>(0.961,1.025)       |
| 2019/20 season vs. 2017/18                      | 1.264***<br>(1.245,1.282) | 1.107***<br>(1.088,1.126)   | 1.437***<br>(1.332,1.542)  | 1.731***<br>(1.580,1.882)   | 1.404***<br>(1.363,1.444)    |
| <b>ACEi or ARB monotherapy</b>                  |                           |                             |                            |                             |                              |
| 2018/19 season vs. 2017/18                      | N/A                       | N/A                         | N/A                        | N/A                         | N/A                          |
| 2019/20 season vs. 2017/18                      | N/A                       | N/A                         | N/A                        | N/A                         | N/A                          |
| Number of episodes                              | 1,059,474                 | 167,330                     | 167,330                    | 167,330                     | 1,057,707                    |
| Number of people                                | 728,455                   | 147,846                     | 147,846                    | 147,846                     | 727,311                      |

Note: p-value for risk ratios is for the null hypothesis that the risk ratio = 1

N/A: variable not included in model

\* p<0.05, \*\* p<0.01, \*\*\* p<0.001

**Sensitivity analysis: ACEi/ARB monotherapy**

|                                                       | (6)                          | (7)                          | (8)                         | (9)                          | (10)                         |
|-------------------------------------------------------|------------------------------|------------------------------|-----------------------------|------------------------------|------------------------------|
|                                                       | Inpatient stay               | Inpatient stay with ICU/CCU  | Inpatient stay with ARD dx  | Inpatient stay with ARDS dx  | Died same or following month |
| <b>Key coefficient estimates</b>                      |                              |                              |                             |                              |                              |
| <b>Season</b>                                         |                              |                              |                             |                              |                              |
| 2017-2018 flu season                                  | ref.                         | ref.                         | ref.                        | ref.                         | ref.                         |
| 2018-2019 flu season                                  | -0.001<br>(-0.004,0.002)     | 0.008<br>(-0.002,0.018)      | 0.013***<br>(0.008,0.017)   | -0.007***<br>(-0.010,-0.004) | 0<br>(-0.002,0.002)          |
| 2019-2020 flu season                                  | 0.018***<br>(0.015,0.021)    | 0.035***<br>(0.026,0.044)    | 0.013***<br>(0.008,0.017)   | 0.013***<br>(0.009,0.016)    | 0.016***<br>(0.014,0.017)    |
| <b>HTN medication group</b>                           |                              |                              |                             |                              |                              |
| Other medications only                                | ref.                         | ref.                         | ref.                        | ref.                         | ref.                         |
| ACEi or ARB plus/minus other medications              | -0.020***<br>(-0.023,-0.017) | -0.004<br>(-0.014,0.006)     | -0.007**<br>(-0.011,-0.002) | -0.002<br>(-0.006,0.001)     | -0.010***<br>(-0.012,-0.009) |
| ACEi or ARB monotherapy                               | -0.016***<br>(-0.020,-0.012) | -0.039***<br>(-0.057,-0.020) | -0.007<br>(-0.015,0.001)    | -0.009**<br>(-0.015,-0.003)  | -0.004***<br>(-0.006,-0.002) |
| <b>Season/medication interactions</b>                 |                              |                              |                             |                              |                              |
| 2018-2019 season: ACEi or ARB +/- other               | 0.004*<br>(0.000,0.008)      | 0.004<br>(-0.009,0.018)      | 0.004<br>(-0.003,0.010)     | -0.001<br>(-0.005,0.004)     | -0.001<br>(-0.003,0.002)     |
| 2018-2019 season: ACEi or ARB monotherapy             | 0.005<br>(-0.001,0.010)      | 0.040**<br>(0.015,0.065)     | 0.002<br>(-0.009,0.013)     | 0.002<br>(-0.006,0.009)      | 0.001<br>(-0.002,0.004)      |
| 2019-2020 season: ACEi or ARB +/- other               | 0.015***<br>(0.011,0.019)    | 0.011<br>(-0.001,0.024)      | 0.007*<br>(0.002,0.013)     | 0.008***<br>(0.003,0.013)    | -0.001<br>(-0.004,0.001)     |
| 2019-2020 season: ACEi or ARB monotherapy             | 0.017***<br>(0.012,0.022)    | 0.035**<br>(0.013,0.057)     | 0.004<br>(-0.006,0.013)     | 0.012**<br>(0.004,0.020)     | -0.003*<br>(-0.006,-0.000)   |
| Note: p-value for coefficients is for the null hypotl |                              |                              |                             |                              |                              |
| <b>Marginal effects/predicted probability</b>         |                              |                              |                             |                              |                              |
| <b>Other hypertension medications only</b>            |                              |                              |                             |                              |                              |
| 2017/18                                               | 0.179<br>(0.177,0.181)       | 0.481<br>(0.474,0.489)       | 0.053<br>(0.050,0.056)      | 0.030<br>(0.028,0.033)       | 0.064<br>(0.062,0.065)       |
| 2018/19                                               | 0.178<br>(0.176,0.180)       | 0.490<br>(0.483,0.496)       | 0.066<br>(0.062,0.069)      | 0.023<br>(0.021,0.025)       | 0.064<br>(0.063,0.065)       |
| 2019/20                                               | 0.196<br>(0.195,0.198)       | 0.516<br>(0.511,0.521)       | 0.066<br>(0.063,0.068)      | 0.043<br>(0.041,0.045)       | 0.079<br>(0.078,0.081)       |

## Sensitivity analysis: ACEi/ARB monotherapy

|                                                 | (6)                       | (7)                         | (8)                        | (9)                         | (10)                         |
|-------------------------------------------------|---------------------------|-----------------------------|----------------------------|-----------------------------|------------------------------|
|                                                 | Inpatient stay            | Inpatient stay with ICU/CCU | Inpatient stay with ARD dx | Inpatient stay with ARDS dx | Died same or following month |
| <b>ACEi or ARB plus/minus other medications</b> |                           |                             |                            |                             |                              |
| 2017/18                                         | 0.133<br>(0.132,0.135)    | 0.473<br>(0.466,0.480)      | 0.046<br>(0.043,0.049)     | 0.030<br>(0.027,0.032)      | 0.037<br>(0.036,0.038)       |
| 2018/19                                         | 0.136<br>(0.135,0.138)    | 0.486<br>(0.479,0.492)      | 0.062<br>(0.059,0.065)     | 0.022<br>(0.020,0.024)      | 0.037<br>(0.036,0.038)       |
| 2019/20                                         | 0.166<br>(0.164,0.167)    | 0.519<br>(0.514,0.524)      | 0.066<br>(0.063,0.068)     | 0.050<br>(0.048,0.052)      | 0.052<br>(0.051,0.053)       |
| <b>ACEi or ARB monotherapy</b>                  |                           |                             |                            |                             |                              |
| 2017/18                                         | 0.093<br>(0.090,0.096)    | 0.408<br>(0.392,0.425)      | 0.040<br>(0.033,0.047)     | 0.024<br>(0.019,0.029)      | 0.024<br>(0.022,0.025)       |
| 2018/19                                         | 0.096<br>(0.094,0.099)    | 0.456<br>(0.441,0.472)      | 0.054<br>(0.047,0.061)     | 0.018<br>(0.014,0.022)      | 0.025<br>(0.023,0.026)       |
| 2019/20                                         | 0.127<br>(0.125,0.130)    | 0.478<br>(0.467,0.489)      | 0.056<br>(0.051,0.061)     | 0.048<br>(0.043,0.053)      | 0.036<br>(0.034,0.037)       |
| <b>Risk ratios of marginal effects</b>          |                           |                             |                            |                             |                              |
| <b>Other hypertension medications only</b>      |                           |                             |                            |                             |                              |
| 2018/19 season vs. 2017/18                      | 0.994<br>(0.977,1.011)    | 1.017<br>(0.996,1.038)      | 1.236***<br>(1.136,1.337)  | 0.759***<br>(0.668,0.850)   | 0.999<br>(0.969,1.030)       |
| 2019/20 season vs. 2017/18                      | 1.098***<br>(1.081,1.116) | 1.072***<br>(1.053,1.092)   | 1.238***<br>(1.147,1.330)  | 1.414***<br>(1.278,1.550)   | 1.243***<br>(1.209,1.278)    |
| <b>ACEi or ARB plus/minus other medications</b> |                           |                             |                            |                             |                              |
| 2018/19 season vs. 2017/18                      | 1.023*<br>(1.005,1.041)   | 1.027*<br>(1.006,1.048)     | 1.360***<br>(1.243,1.476)  | 0.735***<br>(0.647,0.824)   | 0.985<br>(0.950,1.019)       |
| 2019/20 season vs. 2017/18                      | 1.244***<br>(1.225,1.264) | 1.097***<br>(1.077,1.118)   | 1.441***<br>(1.329,1.554)  | 1.690***<br>(1.532,1.848)   | 1.382***<br>(1.339,1.425)    |
| <b>ACEi or ARB monotherapy</b>                  |                           |                             |                            |                             |                              |
| 2018/19 season vs. 2017/18                      | 1.037<br>(0.993,1.080)    | 1.117***<br>(1.058,1.177)   | 1.358*<br>(1.055,1.660)    | 0.766<br>(0.526,1.006)      | 1.047<br>(0.958,1.136)       |
| 2019/20 season vs. 2017/18                      | 1.369***<br>(1.318,1.420) | 1.170***<br>(1.115,1.226)   | 1.412**<br>(1.129,1.694)   | 2.028***<br>(1.537,2.519)   | 1.526***<br>(1.412,1.640)    |
| Number of episodes                              | 1,059,474                 | 167,330                     | 167,330                    | 167,330                     | 1,057,707                    |
| Number of people                                | 728,455                   | 147,846                     | 147,846                    | 147,846                     | 727,311                      |

Note: p-value for risk ratios is for the null hypothe

N/A: variable not included in model

\* p<0.05, \*\* p<0.01, \*\*\* p<0.001

### Sensitivity analysis: Dropping people with comorbidities (other than hypertension)

|                                                       | (11)                         | (12)                        | (13)                       | (14)                        | (15)                         |
|-------------------------------------------------------|------------------------------|-----------------------------|----------------------------|-----------------------------|------------------------------|
|                                                       | Inpatient stay               | Inpatient stay with ICU/CCU | Inpatient stay with ARD dx | Inpatient stay with ARDS dx | Died same or following month |
| <b>Key coefficient estimates</b>                      |                              |                             |                            |                             |                              |
| <b>Season</b>                                         |                              |                             |                            |                             |                              |
| 2017-2018 flu season                                  | ref.                         | ref.                        | ref.                       | ref.                        | ref.                         |
| 2018-2019 flu season                                  | 0.002<br>(-0.001,0.006)      | 0.02<br>(-0.032,0.072)      | 0.030**<br>(0.009,0.051)   | 0.006<br>(-0.005,0.017)     | 0<br>(-0.002,0.002)          |
| 2019-2020 flu season                                  | 0.032***<br>(0.028,0.035)    | 0.068**<br>(0.024,0.111)    | 0.029***<br>(0.014,0.045)  | 0.052***<br>(0.039,0.065)   | 0.007***<br>(0.005,0.009)    |
| <b>HTN medication group</b>                           |                              |                             |                            |                             |                              |
| Other medications only                                | ref.                         | ref.                        | ref.                       | ref.                        | ref.                         |
| ACEi or ARB plus/minus other medications              | -0.006***<br>(-0.009,-0.003) | -0.001<br>(-0.049,0.046)    | 0.009<br>(-0.008,0.026)    | 0.003<br>(-0.007,0.013)     | -0.003***<br>(-0.004,-0.001) |
| ACEi or ARB monotherapy                               | N/A                          | N/A                         | N/A                        | N/A                         | N/A                          |
| <b>Season/medication interactions</b>                 |                              |                             |                            |                             |                              |
| 2018-2019 season: ACEi or ARB +- other                | -0.003<br>(-0.007,0.001)     | 0.004<br>(-0.062,0.071)     | -0.013<br>(-0.041,0.014)   | 0.001<br>(-0.015,0.017)     | 0.001<br>(-0.001,0.003)      |
| 2018-2019 season: ACEi or ARB monotherapy             | N/A                          | N/A                         | N/A                        | N/A                         | N/A                          |
| 2019-2020 season: ACEi or ARB +/- other               | -0.001<br>(-0.006,0.003)     | 0.05<br>(-0.006,0.106)      | -0.022*<br>(-0.043,-0.001) | -0.001<br>(-0.019,0.016)    | -0.001<br>(-0.003,0.001)     |
| 2019-2020 season: ACEi or ARB monotherapy             | N/A                          | N/A                         | N/A                        | N/A                         | N/A                          |
| Note: p-value for coefficients is for the null hypotl |                              |                             |                            |                             |                              |
| <b>Marginal effects/predicted probability</b>         |                              |                             |                            |                             |                              |
| <b>Other hypertension medications only</b>            |                              |                             |                            |                             |                              |
| 2017/18                                               | 0.031<br>(0.029,0.034)       | 0.312<br>(0.275,0.350)      | 0.023<br>(0.011,0.035)     | 0.009<br>(0.002,0.016)      | 0.007<br>(0.006,0.009)       |
| 2018/19                                               | 0.033<br>(0.031,0.036)       | 0.332<br>(0.296,0.368)      | 0.053<br>(0.036,0.070)     | 0.015<br>(0.006,0.024)      | 0.007<br>(0.006,0.008)       |
| 2019/20                                               | 0.063<br>(0.060,0.066)       | 0.380<br>(0.357,0.403)      | 0.053<br>(0.042,0.063)     | 0.061<br>(0.050,0.073)      | 0.014<br>(0.013,0.016)       |

### Sensitivity analysis: Dropping people with comorbidities (other than hypertension)

|                                                 | (11)                      | (12)                        | (13)                       | (14)                        | (15)                         |
|-------------------------------------------------|---------------------------|-----------------------------|----------------------------|-----------------------------|------------------------------|
|                                                 | Inpatient stay            | Inpatient stay with ICU/CCU | Inpatient stay with ARD dx | Inpatient stay with ARDS dx | Died same or following month |
| <b>ACEi or ARB plus/minus other medications</b> |                           |                             |                            |                             |                              |
| 2017/18                                         | 0.023<br>(0.022,0.025)    | 0.319<br>(0.289,0.349)      | 0.033<br>(0.021,0.044)     | 0.016<br>(0.008,0.023)      | 0.004<br>(0.003,0.004)       |
| 2018/19                                         | 0.022<br>(0.021,0.024)    | 0.343<br>(0.313,0.373)      | 0.049<br>(0.036,0.063)     | 0.023<br>(0.014,0.032)      | 0.004<br>(0.004,0.005)       |
| 2019/20                                         | 0.054<br>(0.052,0.055)    | 0.436<br>(0.418,0.454)      | 0.040<br>(0.033,0.048)     | 0.067<br>(0.058,0.076)      | 0.010<br>(0.009,0.011)       |
| <b>ACEi or ARB monotherapy</b>                  |                           |                             |                            |                             |                              |
| 2017/18                                         | N/A                       | N/A                         | N/A                        | N/A                         | N/A                          |
| 2018/19                                         | N/A                       | N/A                         | N/A                        | N/A                         | N/A                          |
| 2019/20                                         | N/A                       | N/A                         | N/A                        | N/A                         | N/A                          |
| <b>Risk ratios of marginal effects</b>          |                           |                             |                            |                             |                              |
| <b>Other hypertension medications only</b>      |                           |                             |                            |                             |                              |
| 2018/19 season vs. 2017/18                      | 1.069<br>(0.953,1.186)    | 1.064<br>(0.893,1.235)      | 2.291<br>(0.893,3.688)     | 1.633<br>(0.078,3.189)      | 0.973<br>(0.744,1.203)       |
| 2019/20 season vs. 2017/18                      | 2.008***<br>(1.823,2.193) | 1.216**<br>(1.053,1.379)    | 2.270*<br>(1.013,3.526)    | 6.718*<br>(1.473,11.963)    | 1.942***<br>(1.561,2.323)    |
| <b>ACEi or ARB plus/minus other medications</b> |                           |                             |                            |                             |                              |
| 2018/19 season vs. 2017/18                      | 0.961<br>(0.875,1.047)    | 1.076<br>(0.939,1.213)      | 1.510<br>(0.842,2.177)     | 1.432<br>(0.544,2.320)      | 1.128<br>(0.879,1.377)       |
| 2019/20 season vs. 2017/18                      | 2.291***<br>(2.124,2.458) | 1.369***<br>(1.228,1.509)   | 1.234<br>(0.754,1.713)     | 4.210**<br>(2.113,6.308)    | 2.624***<br>(2.142,3.107)    |
| <b>ACEi or ARB monotherapy</b>                  |                           |                             |                            |                             |                              |
| 2018/19 season vs. 2017/18                      | N/A                       | N/A                         | N/A                        | N/A                         | N/A                          |
| 2019/20 season vs. 2017/18                      | N/A                       | N/A                         | N/A                        | N/A                         | N/A                          |
| Number of episodes                              | 200,778                   | 7,696                       | 7,696                      | 7,696                       | 200,508                      |
| Number of people                                | 175,494                   | 7,647                       | 7,647                      | 7,647                       | 175,251                      |

Note: p-value for risk ratios is for the null hypothe

N/A: variable not included in model

\* p<0.05, \*\* p<0.01, \*\*\* p<0.001

**Sensitivity analysis: limiting analysis to strict flu season (dropping summer months)**

|                                                       | (16)                         | (17)                        | (18)                        | (19)                         | (20)                         |
|-------------------------------------------------------|------------------------------|-----------------------------|-----------------------------|------------------------------|------------------------------|
|                                                       | Inpatient stay               | Inpatient stay with ICU/CCU | Inpatient stay with ARD dx  | Inpatient stay with ARDS dx  | Died same or following month |
| <b>Key coefficient estimates</b>                      |                              |                             |                             |                              |                              |
| <b>Season</b>                                         |                              |                             |                             |                              |                              |
| 2017-2018 flu season                                  | ref.                         | ref.                        | ref.                        | ref.                         | ref.                         |
| 2018-2019 flu season                                  | 0<br>(-0.004,0.003)          | 0.009<br>(-0.002,0.019)     | 0.017***<br>(0.012,0.022)   | -0.007***<br>(-0.010,-0.003) | 0<br>(-0.002,0.002)          |
| 2019-2020 flu season                                  | 0.003*<br>(0.000,0.007)      | 0.030***<br>(0.020,0.041)   | 0.017***<br>(0.011,0.022)   | 0.010***<br>(0.006,0.014)    | 0.017***<br>(0.015,0.020)    |
| <b>HTN medication group</b>                           |                              |                             |                             |                              |                              |
| Other medications only                                | ref.                         | ref.                        | ref.                        | ref.                         | ref.                         |
| ACEi or ARB plus/minus other medications              | -0.016***<br>(-0.019,-0.013) | -0.01<br>(-0.021,0.000)     | -0.007**<br>(-0.011,-0.002) | -0.003<br>(-0.006,0.001)     | -0.009***<br>(-0.010,-0.007) |
| ACEi or ARB monotherapy                               | N/A                          | N/A                         | N/A                         | N/A                          | N/A                          |
| <b>Season/medication interactions</b>                 |                              |                             |                             |                              |                              |
| 2018-2019 season: ACEi or ARB +- other                | 0.002<br>(-0.002,0.006)      | 0.01<br>(-0.004,0.025)      | 0.001<br>(-0.006,0.008)     | 0<br>(-0.005,0.004)          | 0<br>(-0.003,0.002)          |
| 2018-2019 season: ACEi or ARB monotherapy             | N/A                          | N/A                         | N/A                         | N/A                          | N/A                          |
| 2019-2020 season: ACEi or ARB +/- other               | 0.008***<br>(0.004,0.012)    | 0.012<br>(-0.003,0.026)     | 0.008*<br>(0.001,0.014)     | 0.008**<br>(0.002,0.013)     | -0.005***<br>(-0.008,-0.002) |
| 2019-2020 season: ACEi or ARB monotherapy             | N/A                          | N/A                         | N/A                         | N/A                          | N/A                          |
| Note: p-value for coefficients is for the null hypotl |                              |                             |                             |                              |                              |
| <b>Marginal effects/predicted probability</b>         |                              |                             |                             |                              |                              |
| <b>Other hypertension medications only</b>            |                              |                             |                             |                              |                              |
| 2017/18                                               | 0.175<br>(0.173,0.178)       | 0.480<br>(0.472,0.487)      | 0.053<br>(0.049,0.056)      | 0.030<br>(0.028,0.033)       | 0.061<br>(0.060,0.063)       |
| 2018/19                                               | 0.175<br>(0.172,0.177)       | 0.488<br>(0.480,0.496)      | 0.070<br>(0.066,0.074)      | 0.024<br>(0.021,0.026)       | 0.061<br>(0.060,0.063)       |
| 2019/20                                               | 0.179<br>(0.176,0.181)       | 0.510<br>(0.503,0.517)      | 0.069<br>(0.066,0.073)      | 0.041<br>(0.038,0.044)       | 0.079<br>(0.077,0.080)       |

**Sensitivity analysis: limiting analysis to strict flu season (dropping summer months)**

|                                                 | (16)                      | (17)                        | (18)                       | (19)                        | (20)                         |
|-------------------------------------------------|---------------------------|-----------------------------|----------------------------|-----------------------------|------------------------------|
|                                                 | Inpatient stay            | Inpatient stay with ICU/CCU | Inpatient stay with ARD dx | Inpatient stay with ARDS dx | Died same or following month |
| <b>ACEi or ARB plus/minus other medications</b> |                           |                             |                            |                             |                              |
| 2017/18                                         | 0.122<br>(0.120,0.123)    | 0.459<br>(0.452,0.466)      | 0.044<br>(0.041,0.047)     | 0.028<br>(0.026,0.031)      | 0.033<br>(0.032,0.033)       |
| 2018/19                                         | 0.124<br>(0.122,0.125)    | 0.478<br>(0.470,0.485)      | 0.063<br>(0.059,0.066)     | 0.021<br>(0.019,0.023)      | 0.032<br>(0.032,0.033)       |
| 2019/20                                         | 0.133<br>(0.131,0.134)    | 0.501<br>(0.494,0.508)      | 0.069<br>(0.065,0.072)     | 0.046<br>(0.044,0.049)      | 0.045<br>(0.044,0.046)       |
| <b>ACEi or ARB monotherapy</b>                  |                           |                             |                            |                             |                              |
| 2017/18                                         | N/A                       | N/A                         | N/A                        | N/A                         | N/A                          |
| 2018/19                                         | N/A                       | N/A                         | N/A                        | N/A                         | N/A                          |
| 2019/20                                         | N/A                       | N/A                         | N/A                        | N/A                         | N/A                          |
| <b>Risk ratios of marginal effects</b>          |                           |                             |                            |                             |                              |
| <b>Other hypertension medications only</b>      |                           |                             |                            |                             |                              |
| 2018/19 season vs. 2017/18                      | 0.998<br>(0.979,1.017)    | 1.018<br>(0.995,1.041)      | 1.324***<br>(1.208,1.440)  | 0.776***<br>(0.673,0.879)   | 1.002<br>(0.967,1.036)       |
| 2019/20 season vs. 2017/18                      | 1.019<br>(1.000,1.039)    | 1.064***<br>(1.041,1.087)   | 1.313***<br>(1.201,1.425)  | 1.343***<br>(1.190,1.495)   | 1.282***<br>(1.241,1.324)    |
| <b>ACEi or ARB plus/minus other medications</b> |                           |                             |                            |                             |                              |
| 2018/19 season vs. 2017/18                      | 1.017<br>(0.999,1.035)    | 1.041***<br>(1.019,1.063)   | 1.411***<br>(1.289,1.533)  | 0.750***<br>(0.655,0.846)   | 0.997<br>(0.960,1.034)       |
| 2019/20 season vs. 2017/18                      | 1.091***<br>(1.071,1.110) | 1.092***<br>(1.069,1.114)   | 1.542***<br>(1.413,1.671)  | 1.634***<br>(1.465,1.803)   | 1.380***<br>(1.331,1.428)    |
| <b>ACEi or ARB monotherapy</b>                  |                           |                             |                            |                             |                              |
| 2018/19 season vs. 2017/18                      | N/A                       | N/A                         | N/A                        | N/A                         | N/A                          |
| 2019/20 season vs. 2017/18                      | N/A                       | N/A                         | N/A                        | N/A                         | N/A                          |
| Number of episodes                              | 738,240                   | 106,917                     | 106,917                    | 106,917                     | 737,059                      |
| Number of people                                | 556,579                   | 97,383                      | 97,383                     | 97,383                      | 555,729                      |

Note: p-value for risk ratios is for the null hypothe

N/A: variable not included in model

\* p<0.05, \*\* p<0.01, \*\*\* p<0.001



**The RECORD statement – checklist of items, extended from the STROBE statement, that should be reported in observational studies using routinely collected health data.**

|                           | Item No. | STROBE items                                                                                                                                                                               | Location in manuscript where items are reported | RECORD items                                                                                                                                                                                                                                                                                                                                                                                                                                | Location in manuscript where items are reported |
|---------------------------|----------|--------------------------------------------------------------------------------------------------------------------------------------------------------------------------------------------|-------------------------------------------------|---------------------------------------------------------------------------------------------------------------------------------------------------------------------------------------------------------------------------------------------------------------------------------------------------------------------------------------------------------------------------------------------------------------------------------------------|-------------------------------------------------|
| <b>Title and abstract</b> |          |                                                                                                                                                                                            |                                                 |                                                                                                                                                                                                                                                                                                                                                                                                                                             |                                                 |
|                           | 1        | (a) Indicate the study's design with a commonly used term in the title or the abstract (b) Provide in the abstract an informative and balanced summary of what was done and what was found |                                                 | RECORD 1.1: The type of data used should be specified in the title or abstract. When possible, the name of the databases used should be included.<br><br>RECORD 1.2: If applicable, the geographic region and timeframe within which the study took place should be reported in the title or abstract.<br><br>RECORD 1.3: If linkage between databases was conducted for the study, this should be clearly stated in the title or abstract. |                                                 |
| <b>Introduction</b>       |          |                                                                                                                                                                                            |                                                 |                                                                                                                                                                                                                                                                                                                                                                                                                                             |                                                 |
| Background rationale      | 2        | Explain the scientific background and rationale for the investigation being reported                                                                                                       |                                                 |                                                                                                                                                                                                                                                                                                                                                                                                                                             |                                                 |
| Objectives                | 3        | State specific objectives, including any prespecified hypotheses                                                                                                                           |                                                 |                                                                                                                                                                                                                                                                                                                                                                                                                                             |                                                 |
| <b>Methods</b>            |          |                                                                                                                                                                                            |                                                 |                                                                                                                                                                                                                                                                                                                                                                                                                                             |                                                 |
| Study Design              | 4        | Present key elements of study design early in the paper                                                                                                                                    |                                                 |                                                                                                                                                                                                                                                                                                                                                                                                                                             |                                                 |
| Setting                   | 5        | Describe the setting, locations, and relevant dates, including periods of recruitment, exposure, follow-up, and data collection                                                            |                                                 |                                                                                                                                                                                                                                                                                                                                                                                                                                             |                                                 |
| Participants              | 6        | (a) <i>Cohort study</i> - Give the                                                                                                                                                         |                                                 | RECORD 6.1: The methods of study                                                                                                                                                                                                                                                                                                                                                                                                            |                                                 |

|                                                                                                                                                                                 |   |                                                                                                                                                                                                                                                                                                                                                                                                                                                                                                                                                                                                                                                                                        |  |                                                                                                                                                                                                                                                                                                                                                                                                                                                                                                                                                                                                                                                                     |  |
|---------------------------------------------------------------------------------------------------------------------------------------------------------------------------------|---|----------------------------------------------------------------------------------------------------------------------------------------------------------------------------------------------------------------------------------------------------------------------------------------------------------------------------------------------------------------------------------------------------------------------------------------------------------------------------------------------------------------------------------------------------------------------------------------------------------------------------------------------------------------------------------------|--|---------------------------------------------------------------------------------------------------------------------------------------------------------------------------------------------------------------------------------------------------------------------------------------------------------------------------------------------------------------------------------------------------------------------------------------------------------------------------------------------------------------------------------------------------------------------------------------------------------------------------------------------------------------------|--|
| <p>1<br/>2<br/>3<br/>4<br/>5<br/>6<br/>7<br/>8<br/>9<br/>10<br/>11<br/>12<br/>13<br/>14<br/>15<br/>16<br/>17<br/>18<br/>19<br/>20<br/>21<br/>22<br/>23<br/>24<br/>25<br/>26</p> |   | <p>eligibility criteria, and the sources and methods of selection of participants. Describe methods of follow-up<br/> <i>Case-control study</i> - Give the eligibility criteria, and the sources and methods of case ascertainment and control selection. Give the rationale for the choice of cases and controls<br/> <i>Cross-sectional study</i> - Give the eligibility criteria, and the sources and methods of selection of participants<br/><br/> <i>(b) Cohort study</i> - For matched studies, give matching criteria and number of exposed and unexposed<br/> <i>Case-control study</i> - For matched studies, give matching criteria and the number of controls per case</p> |  | <p>population selection (such as codes or algorithms used to identify subjects) should be listed in detail. If this is not possible, an explanation should be provided.</p> <p>RECORD 6.2: Any validation studies of the codes or algorithms used to select the population should be referenced. If validation was conducted for this study and not published elsewhere, detailed methods and results should be provided.</p> <p>RECORD 6.3: If the study involved linkage of databases, consider use of a flow diagram or other graphical display to demonstrate the data linkage process, including the number of individuals with linked data at each stage.</p> |  |
| <p>27<br/>28<br/>29<br/>30<br/>31<br/>32<br/>33</p>                                                                                                                             | 7 | <p>Clearly define all outcomes, exposures, predictors, potential confounders, and effect modifiers. Give diagnostic criteria, if applicable.</p>                                                                                                                                                                                                                                                                                                                                                                                                                                                                                                                                       |  | <p>RECORD 7.1: A complete list of codes and algorithms used to classify exposures, outcomes, confounders, and effect modifiers should be provided. If these cannot be reported, an explanation should be provided.</p>                                                                                                                                                                                                                                                                                                                                                                                                                                              |  |
| <p>34<br/>35<br/>36<br/>37<br/>38<br/>39<br/>40<br/>41</p>                                                                                                                      | 8 | <p>For each variable of interest, give sources of data and details of methods of assessment (measurement). Describe comparability of assessment methods if there is more than one group</p>                                                                                                                                                                                                                                                                                                                                                                                                                                                                                            |  |                                                                                                                                                                                                                                                                                                                                                                                                                                                                                                                                                                                                                                                                     |  |
| <p>42<br/>43<br/>44</p>                                                                                                                                                         | 9 | <p>Describe any efforts to address potential sources of bias</p>                                                                                                                                                                                                                                                                                                                                                                                                                                                                                                                                                                                                                       |  |                                                                                                                                                                                                                                                                                                                                                                                                                                                                                                                                                                                                                                                                     |  |

|                                                                                                                                                  |                                  |    |                                                                                                                                                                                                                                                                                                                                                                                                                                                                                                                                                                      |                                                                                                                                                                                                                                                              |  |
|--------------------------------------------------------------------------------------------------------------------------------------------------|----------------------------------|----|----------------------------------------------------------------------------------------------------------------------------------------------------------------------------------------------------------------------------------------------------------------------------------------------------------------------------------------------------------------------------------------------------------------------------------------------------------------------------------------------------------------------------------------------------------------------|--------------------------------------------------------------------------------------------------------------------------------------------------------------------------------------------------------------------------------------------------------------|--|
| 1<br>2<br>3<br>4<br>5<br>6<br>7                                                                                                                  | Study size                       | 10 | Explain how the study size was arrived at                                                                                                                                                                                                                                                                                                                                                                                                                                                                                                                            |                                                                                                                                                                                                                                                              |  |
| 8<br>9<br>10<br>11<br>12<br>13<br>14<br>15<br>16<br>17<br>18<br>19<br>20<br>21<br>22<br>23<br>24<br>25<br>26<br>27<br>28<br>29<br>30<br>31<br>32 | Quantitative variables           | 11 | Explain how quantitative variables were handled in the analyses. If applicable, describe which groupings were chosen, and why                                                                                                                                                                                                                                                                                                                                                                                                                                        |                                                                                                                                                                                                                                                              |  |
| 33<br>34<br>35<br>36<br>37<br>38<br>39<br>40<br>41<br>42                                                                                         | Statistical methods              | 12 | (a) Describe all statistical methods, including those used to control for confounding<br>(b) Describe any methods used to examine subgroups and interactions<br>(c) Explain how missing data were addressed<br>(d) <i>Cohort study</i> - If applicable, explain how loss to follow-up was addressed<br><i>Case-control study</i> - If applicable, explain how matching of cases and controls was addressed<br><i>Cross-sectional study</i> - If applicable, describe analytical methods taking account of sampling strategy<br>(e) Describe any sensitivity analyses |                                                                                                                                                                                                                                                              |  |
| 43<br>44<br>45<br>46<br>47                                                                                                                       | Data access and cleaning methods |    | ..                                                                                                                                                                                                                                                                                                                                                                                                                                                                                                                                                                   | RECORD 12.1: Authors should describe the extent to which the investigators had access to the database population used to create the study population.<br><br>RECORD 12.2: Authors should provide information on the data cleaning methods used in the study. |  |
|                                                                                                                                                  | Linkage                          |    | ..                                                                                                                                                                                                                                                                                                                                                                                                                                                                                                                                                                   | RECORD 12.3: State whether the                                                                                                                                                                                                                               |  |

|                  |    |                                                                                                                                                                                                                                                                                                                                                 |  |                                                                                                                                                                                                                                                                                                                    |  |
|------------------|----|-------------------------------------------------------------------------------------------------------------------------------------------------------------------------------------------------------------------------------------------------------------------------------------------------------------------------------------------------|--|--------------------------------------------------------------------------------------------------------------------------------------------------------------------------------------------------------------------------------------------------------------------------------------------------------------------|--|
|                  |    |                                                                                                                                                                                                                                                                                                                                                 |  | study included person-level, institutional-level, or other data linkage across two or more databases. The methods of linkage and methods of linkage quality evaluation should be provided.                                                                                                                         |  |
| <b>Results</b>   |    |                                                                                                                                                                                                                                                                                                                                                 |  |                                                                                                                                                                                                                                                                                                                    |  |
| Participants     | 13 | (a) Report the numbers of individuals at each stage of the study ( <i>e.g.</i> , numbers potentially eligible, examined for eligibility, confirmed eligible, included in the study, completing follow-up, and analysed)<br>(b) Give reasons for non-participation at each stage.<br>(c) Consider use of a flow diagram                          |  | RECORD 13.1: Describe in detail the selection of the persons included in the study ( <i>i.e.</i> , study population selection) including filtering based on data quality, data availability and linkage. The selection of included persons can be described in the text and/or by means of the study flow diagram. |  |
| Descriptive data | 14 | (a) Give characteristics of study participants ( <i>e.g.</i> , demographic, clinical, social) and information on exposures and potential confounders<br>(b) Indicate the number of participants with missing data for each variable of interest<br>(c) <i>Cohort study</i> - summarise follow-up time ( <i>e.g.</i> , average and total amount) |  |                                                                                                                                                                                                                                                                                                                    |  |
| Outcome data     | 15 | <i>Cohort study</i> - Report numbers of outcome events or summary measures over time<br><i>Case-control study</i> - Report numbers in each exposure category, or summary measures of exposure<br><i>Cross-sectional study</i> - Report numbers of outcome events or                                                                             |  |                                                                                                                                                                                                                                                                                                                    |  |

1  
2  
3  
4  
5  
6  
7  
8  
9  
10  
11  
12  
13  
14  
15  
16  
17  
18  
19  
20  
21  
22  
23  
24  
25  
26  
27  
28  
29  
30  
31  
32  
33  
34  
35  
36  
37  
38  
39  
40  
41  
42  
43  
44  
45  
46  
47

|                                                                                           |                |                  |                                                                                                                                                                                                                                                                                                                                                                                                                 |                                                                                                                                                                                                                                                                                                          |  |
|-------------------------------------------------------------------------------------------|----------------|------------------|-----------------------------------------------------------------------------------------------------------------------------------------------------------------------------------------------------------------------------------------------------------------------------------------------------------------------------------------------------------------------------------------------------------------|----------------------------------------------------------------------------------------------------------------------------------------------------------------------------------------------------------------------------------------------------------------------------------------------------------|--|
|                                                                                           |                | summary measures |                                                                                                                                                                                                                                                                                                                                                                                                                 |                                                                                                                                                                                                                                                                                                          |  |
| 1<br>2<br>3<br>4<br>5<br>6<br>7<br>8<br>9<br>10<br>11<br>12<br>13<br>14<br>15<br>16<br>17 | Main results   | 16               | (a) Give unadjusted estimates and, if applicable, confounder-adjusted estimates and their precision (e.g., 95% confidence interval). Make clear which confounders were adjusted for and why they were included<br>(b) Report category boundaries when continuous variables were categorized<br>(c) If relevant, consider translating estimates of relative risk into absolute risk for a meaningful time period |                                                                                                                                                                                                                                                                                                          |  |
| 18<br>19<br>20<br>21                                                                      | Other analyses | 17               | Report other analyses done—e.g., analyses of subgroups and interactions, and sensitivity analyses                                                                                                                                                                                                                                                                                                               |                                                                                                                                                                                                                                                                                                          |  |
| <b>Discussion</b>                                                                         |                |                  |                                                                                                                                                                                                                                                                                                                                                                                                                 |                                                                                                                                                                                                                                                                                                          |  |
| 23<br>24<br>25                                                                            | Key results    | 18               | Summarise key results with reference to study objectives                                                                                                                                                                                                                                                                                                                                                        |                                                                                                                                                                                                                                                                                                          |  |
| 26<br>27<br>28<br>29<br>30<br>31<br>32<br>33<br>34<br>35                                  | Limitations    | 19               | Discuss limitations of the study, taking into account sources of potential bias or imprecision. Discuss both direction and magnitude of any potential bias                                                                                                                                                                                                                                                      | RECORD 19.1: Discuss the implications of using data that were not created or collected to answer the specific research question(s). Include discussion of misclassification bias, unmeasured confounding, missing data, and changing eligibility over time, as they pertain to the study being reported. |  |
| 36<br>37<br>38<br>39<br>40<br>41<br>42<br>43<br>44                                        | Interpretation | 20               | Give a cautious overall interpretation of results considering objectives, limitations, multiplicity of analyses, results from similar studies, and other relevant evidence                                                                                                                                                                                                                                      |                                                                                                                                                                                                                                                                                                          |  |

|                                        |                                                           |    |                                                                                                                                                               |                                                                                                                                                          |  |
|----------------------------------------|-----------------------------------------------------------|----|---------------------------------------------------------------------------------------------------------------------------------------------------------------|----------------------------------------------------------------------------------------------------------------------------------------------------------|--|
| 1<br>2<br>3                            | Generalisability                                          | 21 | Discuss the generalisability (external validity) of the study results                                                                                         |                                                                                                                                                          |  |
| 4                                      | <b>Other Information</b>                                  |    |                                                                                                                                                               |                                                                                                                                                          |  |
| 5<br>6<br>7<br>8<br>9                  | Funding                                                   | 22 | Give the source of funding and the role of the funders for the present study and, if applicable, for the original study on which the present article is based |                                                                                                                                                          |  |
| 10<br>11<br>12<br>13<br>14<br>15<br>16 | Accessibility of protocol, raw data, and programming code |    | ..                                                                                                                                                            | RECORD 22.1: Authors should provide information on how to access any supplemental information such as the study protocol, raw data, or programming code. |  |

\*Reference: Benchimol EI, Smeeth L, Guttman A, Harron K, Moher D, Petersen I, Sørensen HT, von Elm E, Langan SM, the RECORD Working Committee. The REporting of studies Conducted using Observational Routinely-collected health Data (RECORD) Statement. *PLoS Medicine* 2015; in press.

\*Checklist is protected under Creative Commons Attribution ([CC BY](https://creativecommons.org/licenses/by/4.0/)) license.
