# Supplementary material for: Association of outpatient use of renin–angiotensin–aldosterone system blockers on outcomes of acute respiratory illness during the COVID-19 pandemic: a cohort study
Source: PubMed Central journal article supplement — BMJ Open. 2022 Jul 6;12(7):e060305. doi: 10.1136/bmjopen-2021-060305 (PMC9260198; doi:10.1136/bmjopen-2021-060305), 2022-07-06
Supplement: bmjopen-2021-060305supp002.pdf [file bmjopen-2021-060305supp002.pdf]

## SUPPLEMENT MATERIAL S2

|                                           | Primary analysis                                   |                                                                 |                                                                |                                                                 |                                                                  |
|-------------------------------------------|----------------------------------------------------|-----------------------------------------------------------------|----------------------------------------------------------------|-----------------------------------------------------------------|------------------------------------------------------------------|
|                                           | (1)<br>Inpatient stay<br>(95% confidence interval) | (2)<br>Inpatient stay with ICU/CCU<br>(95% confidence interval) | (3)<br>Inpatient stay with ARD dx<br>(95% confidence interval) | (4)<br>Inpatient stay with ARDS dx<br>(95% confidence interval) | (5)<br>Died same or following month<br>(95% confidence interval) |
| Flu season / medication type              |                                                    |                                                                 |                                                                |                                                                 |                                                                  |
| 2017-2018 flu season                      | ref.                                               | ref.                                                            | ref.                                                           | ref.                                                            | ref.                                                             |
| 2018-2019 flu season                      | -0.001<br>(-0.004,0.002)                           | 0.008<br>(-0.002,0.018)                                         | 0.013***<br>(0.008,0.017)                                      | -0.007***<br>(-0.010,-0.004)                                    | 0.000<br>(-0.002,0.002)                                          |
| 2019-2020 flu season                      | 0.018***<br>(0.015,0.021)                          | 0.035***<br>(0.026,0.044)                                       | 0.013***<br>(0.008,0.017)                                      | 0.013***<br>(0.009,0.016)                                       | 0.016***<br>(0.014,0.017)                                        |
| Other medications only                    | ref.                                               | ref.                                                            | ref.                                                           | ref.                                                            | ref.                                                             |
| ACEi or ARB plus/minus other medications  | -0.019***<br>(-0.022,-0.016)                       | -0.009<br>(-0.019,0.001)                                        | -0.007**<br>(-0.011,-0.002)                                    | -0.003<br>(-0.007,0.000)                                        | -0.009***<br>(-0.011,-0.008)                                     |
| ACEi or ARB monotherapy                   |                                                    |                                                                 |                                                                |                                                                 |                                                                  |
| 2018-2019 season: ACEi or ARB +/- other   | 0.004*<br>(0.001,0.008)                            | 0.01<br>(-0.004,0.023)                                          | 0.004<br>(-0.003,0.010)                                        | 0<br>(-0.004,0.004)                                             | 0<br>(-0.002,0.002)                                              |
| 2018-2019 season: ACEi or ARB monotherapy |                                                    |                                                                 |                                                                |                                                                 |                                                                  |
| 2019-2020 season: ACEi or ARB +/- other   | 0.015***<br>(0.012,0.019)                          | 0.015*<br>(0.003,0.027)                                         | 0.007*<br>(0.001,0.012)                                        | 0.009***<br>(0.004,0.013)                                       | -0.002<br>(-0.004,0.001)                                         |
| 2019-2020 season: ACEi or ARB monotherapy |                                                    |                                                                 |                                                                |                                                                 |                                                                  |
| Demographics                              |                                                    |                                                                 |                                                                |                                                                 |                                                                  |
| Female                                    | -0.016***<br>(-0.017,-0.014)                       | -0.023***<br>(-0.028,-0.018)                                    | 0<br>(-0.002,0.003)                                            | -0.004***<br>(-0.006,-0.002)                                    | -0.011***<br>(-0.012,-0.010)                                     |
| Age categories                            |                                                    |                                                                 |                                                                |                                                                 |                                                                  |
| <35                                       | -0.006*<br>(-0.011,-0.000)                         | -0.029<br>(-0.078,0.019)                                        | 0.02<br>(-0.006,0.045)                                         | -0.01<br>(-0.028,0.008)                                         | -0.001<br>(-0.003,0.001)                                         |
| 35-44                                     | -0.008***<br>(-0.012,-0.005)                       | -0.028<br>(-0.056,0.000)                                        | 0.006<br>(-0.008,0.019)                                        | -0.004<br>(-0.016,0.008)                                        | 0.001<br>(-0.000,0.002)                                          |
| 45-54                                     | ref.                                               | ref.                                                            | ref.                                                           | ref.                                                            | ref.                                                             |
| 55-64                                     | 0.010***<br>(0.008,0.013)                          | 0.005<br>(-0.009,0.020)                                         | 0.001<br>(-0.005,0.008)                                        | 0.001<br>(-0.005,0.007)                                         | 0.001*<br>(0.000,0.002)                                          |
| 65-74                                     | 0.011***<br>(0.008,0.014)                          | -0.003<br>(-0.017,0.011)                                        | 0.001<br>(-0.006,0.008)                                        | -0.001<br>(-0.007,0.004)                                        | 0.009***<br>(0.007,0.010)                                        |
| 75-84                                     | 0.029***<br>(0.025,0.032)                          | -0.026***<br>(-0.041,-0.012)                                    | -0.002<br>(-0.009,0.004)                                       | -0.005<br>(-0.011,0.001)                                        | 0.024***<br>(0.023,0.026)                                        |
| 85+                                       | 0.045***<br>(0.041,0.048)                          | -0.071***<br>(-0.086,-0.056)                                    | -0.010**<br>(-0.017,-0.003)                                    | -0.014***<br>(-0.020,-0.008)                                    | 0.063***<br>(0.061,0.065)                                        |
| Insurance coverage type                   |                                                    |                                                                 |                                                                |                                                                 |                                                                  |
| Medicare Advantage                        | ref.                                               | ref.                                                            | ref.                                                           | ref.                                                            | ref.                                                             |
| Commercial                                | -0.032***<br>(-0.034,-0.030)                       | 0.01<br>(-0.001,0.020)                                          | 0.001<br>(-0.004,0.006)                                        | 0.003<br>(-0.002,0.007)                                         | -0.001*<br>(-0.002,-0.000)                                       |
| Census region                             |                                                    |                                                                 |                                                                |                                                                 |                                                                  |
| Unknown/other                             | -0.046**<br>(-0.075,-0.016)                        | 0.194*<br>(0.014,0.373)                                         | -0.011<br>(-0.086,0.064)                                       | 0.009<br>(-0.068,0.087)                                         | -0.023*<br>(-0.044,-0.002)                                       |
| New England                               | ref.                                               | ref.                                                            | ref.                                                           | ref.                                                            | ref.                                                             |
| Mid Atlantic                              | -0.008***<br>(-0.012,-0.003)                       | 0.017*<br>(0.003,0.031)                                         | 0.021***<br>(0.015,0.028)                                      | 0.021***<br>(0.016,0.026)                                       | -0.005**<br>(-0.008,-0.002)                                      |
| South Atlantic                            | -0.001<br>(-0.005,0.003)                           | 0.122***<br>(0.110,0.134)                                       | 0.016***<br>(0.011,0.021)                                      | 0.003<br>(-0.002,0.007)                                         | -0.016***<br>(-0.018,-0.013)                                     |

|                               | Primary analysis                                   |                                                                 |                                                                |                                                                 |                                                                  |
|-------------------------------|----------------------------------------------------|-----------------------------------------------------------------|----------------------------------------------------------------|-----------------------------------------------------------------|------------------------------------------------------------------|
|                               | (1)<br>Inpatient stay<br>(95% confidence interval) | (2)<br>Inpatient stay with ICU/CCU<br>(95% confidence interval) | (3)<br>Inpatient stay with ARD dx<br>(95% confidence interval) | (4)<br>Inpatient stay with ARDS dx<br>(95% confidence interval) | (5)<br>Died same or following month<br>(95% confidence interval) |
| E North Central               | 0.018***<br>(0.013,0.022)                          | 0.073***<br>(0.060,0.086)                                       | 0.003<br>(-0.002,0.009)                                        | 0<br>(-0.004,0.004)                                             | -0.009***<br>(-0.012,-0.007)                                     |
| E South Central               | 0.011***<br>(0.007,0.016)                          | 0.071***<br>(0.056,0.085)                                       | 0.018***<br>(0.011,0.024)                                      | -0.001<br>(-0.006,0.005)                                        | -0.009***<br>(-0.011,-0.006)                                     |
| W North Central               | 0.027***<br>(0.022,0.032)                          | 0.093***<br>(0.079,0.107)                                       | 0.004<br>(-0.002,0.010)                                        | 0.006*<br>(0.001,0.011)                                         | -0.007***<br>(-0.010,-0.004)                                     |
| W South Central               | 0.014***<br>(0.010,0.018)                          | 0.111***<br>(0.097,0.124)                                       | 0.017***<br>(0.011,0.023)                                      | 0.003<br>(-0.002,0.007)                                         | -0.011***<br>(-0.014,-0.009)                                     |
| Mountain                      | -0.033***<br>(-0.037,-0.028)                       | 0.122***<br>(0.103,0.140)                                       | -0.007<br>(-0.015,0.000)                                       | 0.008*<br>(0.001,0.016)                                         | -0.019***<br>(-0.022,-0.016)                                     |
| Pacific                       | -0.002<br>(-0.007,0.004)                           | 0.170***<br>(0.151,0.189)                                       | 0.008<br>(-0.000,0.017)                                        | 0.001<br>(-0.006,0.007)                                         | -0.016***<br>(-0.019,-0.013)                                     |
| Race/ethnicity                | -0.007***<br>(-0.010,-0.005)                       | 0.020***<br>(0.013,0.028)                                       | 0.004*<br>(0.001,0.008)                                        | 0.009***<br>(0.006,0.012)                                       | -0.002**<br>(-0.003,-0.001)                                      |
| Unknown/other                 | ref.                                               | ref.                                                            | ref.                                                           | ref.                                                            | ref.                                                             |
| White                         |                                                    |                                                                 |                                                                |                                                                 |                                                                  |
| Black                         | 0.011***<br>(0.009,0.013)                          | -0.010**<br>(-0.017,-0.003)                                     | 0.005**<br>(0.002,0.008)                                       | 0.008***<br>(0.006,0.011)                                       | 0.004***<br>(0.002,0.005)                                        |
| Hispanic                      | -0.016***<br>(-0.018,-0.013)                       | 0.086***<br>(0.077,0.095)                                       | 0.011***<br>(0.006,0.015)                                      | 0.010***<br>(0.007,0.014)                                       | -0.008***<br>(-0.009,-0.006)                                     |
| Asian                         | -0.011***<br>(-0.016,-0.007)                       | 0.020*<br>(0.002,0.039)                                         | 0.002<br>(-0.007,0.010)                                        | 0.007<br>(-0.000,0.014)                                         | -0.001<br>(-0.004,0.002)                                         |
| Comorbidities                 |                                                    |                                                                 |                                                                |                                                                 |                                                                  |
| No diabetes                   | ref.                                               | ref.                                                            | ref.                                                           | ref.                                                            | ref.                                                             |
| Diabetes without CC           | 0.011***<br>(0.009,0.013)                          | 0.012**<br>(0.004,0.019)                                        | 0.005**<br>(0.001,0.009)                                       | 0.004**<br>(0.001,0.007)                                        | 0.005***<br>(0.004,0.006)                                        |
| Diabetes with CC              | 0.029***<br>(0.027,0.031)                          | 0.008**<br>(0.002,0.014)                                        | -0.002<br>(-0.005,0.001)                                       | 0.002<br>(-0.000,0.004)                                         | 0.008***<br>(0.006,0.009)                                        |
| Uncomp hypertension           | ref.                                               | ref.                                                            | ref.                                                           | ref.                                                            | ref.                                                             |
| Comp hypertension             | 0.023***<br>(0.020,0.026)                          | -0.012**<br>(-0.018,-0.005)                                     | -0.003<br>(-0.006,0.000)                                       | -0.003*<br>(-0.005,-0.000)                                      | -0.001<br>(-0.003,0.001)                                         |
| Coronary artery disease       | 0.020***<br>(0.018,0.022)                          | 0.028***<br>(0.022,0.033)                                       | 0.001<br>(-0.001,0.004)                                        | -0.002<br>(-0.004,0.000)                                        | 0.007***<br>(0.006,0.009)                                        |
| Congestive heart failure      | 0.093***<br>(0.090,0.095)                          | 0.077***<br>(0.072,0.083)                                       | 0.018***<br>(0.015,0.020)                                      | 0.002*<br>(0.000,0.004)                                         | 0.036***<br>(0.034,0.037)                                        |
| Chronic pulmonary diseases    | 0.061***<br>(0.059,0.063)                          | -0.010***<br>(-0.015,-0.005)                                    | 0.015***<br>(0.013,0.018)                                      | -0.007***<br>(-0.009,-0.006)                                    | -0.002***<br>(-0.003,-0.001)                                     |
| Renal failure                 | 0.019***<br>(0.017,0.022)                          | 0.012***<br>(0.005,0.018)                                       | -0.001<br>(-0.004,0.003)                                       | 0.001<br>(-0.001,0.004)                                         | 0.023***<br>(0.021,0.025)                                        |
| Liver failure                 | 0.046***<br>(0.042,0.051)                          | 0.035***<br>(0.025,0.045)                                       | -0.003<br>(-0.008,0.002)                                       | 0<br>(-0.004,0.004)                                             | 0.059***<br>(0.056,0.063)                                        |
| Metastatic cancer             | 0.122***<br>(0.115,0.130)                          | 0.01<br>(-0.003,0.024)                                          | 0.003<br>(-0.004,0.009)                                        | -0.010***<br>(-0.014,-0.006)                                    | 0.136***<br>(0.130,0.142)                                        |
| Lymphoma                      | 0.064***<br>(0.056,0.073)                          | -0.008<br>(-0.025,0.009)                                        | -0.001<br>(-0.009,0.007)                                       | -0.010***<br>(-0.015,-0.004)                                    | 0.027***<br>(0.021,0.033)                                        |
| Non-metastatic solid tumor    | 0.036***<br>(0.033,0.040)                          | 0.018***<br>(0.009,0.027)                                       | 0<br>(-0.004,0.005)                                            | -0.003*<br>(-0.006,-0.000)                                      | 0.028***<br>(0.026,0.030)                                        |
| Peripheral vascular disorders | -0.008***<br>(-0.011,-0.006)                       | 0.017***<br>(0.010,0.023)                                       | 0.004**<br>(0.001,0.008)                                       | 0.001<br>(-0.001,0.003)                                         | 0.018***<br>(0.017,0.020)                                        |
| Cardiac arrhythmias           | 0.062***                                           | 0.062***                                                        | 0.005***                                                       | -0.002*                                                         | 0.024***                                                         |

|                                                          | Primary analysis                            |                                                          |                                                         |                                                          |                                                           |
|----------------------------------------------------------|---------------------------------------------|----------------------------------------------------------|---------------------------------------------------------|----------------------------------------------------------|-----------------------------------------------------------|
|                                                          | (1)                                         | (2)                                                      | (3)                                                     | (4)                                                      | (5)                                                       |
|                                                          | Inpatient stay<br>(95% confidence interval) | Inpatient stay with ICU/CCU<br>(95% confidence interval) | Inpatient stay with ARD dx<br>(95% confidence interval) | Inpatient stay with ARDS dx<br>(95% confidence interval) | Died same or following month<br>(95% confidence interval) |
| Rheumatoid arthritis/collagen vascular diseases          | (0.060,0.064)<br>0.016***                   | (0.057,0.067)<br>-0.005                                  | (0.002,0.007)<br>-0.007**                               | (-0.004,-0.000)<br>0                                     | (0.023,0.025)<br>0.004***                                 |
| Coagulopathy                                             | (0.013,0.020)<br>0.029***                   | (-0.016,0.005)<br>0.032***                               | (-0.012,-0.002)<br>-0.004                               | (-0.004,0.004)<br>0.002                                  | (0.002,0.006)<br>0.035***                                 |
| Obesity                                                  | (0.024,0.033)<br>-0.002                     | (0.023,0.041)<br>0.013***                                | (-0.008,0.000)<br>0.004                                 | (-0.001,0.005)<br>0.009***                               | (0.032,0.038)<br>-0.009***                                |
| Chronic/acute deep vein thrombosis or pulmonary embolism | (-0.005,0.000)<br>0.061***                  | (0.006,0.021)<br>0.050***                                | (-0.000,0.007)<br>0.003                                 | (0.006,0.012)<br>0.002                                   | (-0.010,-0.007)<br>0.030***                               |
| Hemorrhagic or ischemic stroke                           | (0.056,0.067)<br>0.016***                   | (0.039,0.061)<br>0.032***                                | (-0.003,0.009)<br>0.002                                 | (-0.003,0.006)<br>-0.004**                               | (0.026,0.034)<br>0.043***                                 |
| Valvular disease                                         | (0.013,0.020)<br>-0.009***                  | (0.024,0.040)<br>0.045***                                | (-0.001,0.006)<br>0.007***                              | (-0.007,-0.001)<br>-0.002                                | (0.040,0.045)<br>0.017***                                 |
| Constant                                                 | (-0.012,-0.006)<br>0.058***                 | (0.038,0.052)<br>0.310***                                | (0.003,0.010)<br>0.020***                               | (-0.004,0.001)<br>0.034***                               | (0.015,0.019)<br>0.012***                                 |
| N                                                        | (0.053,0.063)<br>1059474                    | (0.291,0.330)<br>167330                                  | (0.011,0.029)<br>167330                                 | (0.027,0.041)<br>167330                                  | (0.009,0.015)<br>1057707                                  |
| N_clust                                                  | 728455                                      | 147846                                                   | 147846                                                  | 147846                                                   | 727311                                                    |
| p                                                        | <0.001                                      | <0.001                                                   | <0.001                                                  | <0.001                                                   | <0.001                                                    |
| R-squared                                                | 0.081                                       | 0.037                                                    | 0.006                                                   | 0.008                                                    | 0.076                                                     |

## Sensitivity analysis: ACEi/ARB monotherapy

|                                           | (6)<br>Inpatient stay<br>(95% confidence interval) | (7)<br>Inpatient stay with ICU/CCU<br>(95% confidence interval) | (8)<br>Inpatient stay with ARD dx<br>(95% confidence interval) | (9)<br>Inpatient stay with ARDS dx<br>(95% confidence interval) | (10)<br>Died same or following month<br>(95% confidence interval) |
|-------------------------------------------|----------------------------------------------------|-----------------------------------------------------------------|----------------------------------------------------------------|-----------------------------------------------------------------|-------------------------------------------------------------------|
| Flu season / medication type              |                                                    |                                                                 |                                                                |                                                                 |                                                                   |
| 2017-2018 flu season                      | ref.                                               | ref.                                                            | ref.                                                           | ref.                                                            | ref.                                                              |
| 2018-2019 flu season                      | -0.001<br>(-0.004,0.002)                           | 0.008<br>(-0.002,0.018)                                         | 0.013***<br>(0.008,0.017)                                      | -0.007***<br>(-0.010,-0.004)                                    | 0<br>(-0.002,0.002)                                               |
| 2019-2020 flu season                      | 0.018***<br>(0.015,0.021)                          | 0.035***<br>(0.026,0.044)                                       | 0.013***<br>(0.008,0.017)                                      | 0.013***<br>(0.009,0.016)                                       | 0.016***<br>(0.014,0.017)                                         |
| Other medications only                    | ref.                                               | ref.                                                            | ref.                                                           | ref.                                                            | ref.                                                              |
| ACEi or ARB plus/minus other medications  | -0.020***<br>(-0.023,-0.017)                       | -0.004<br>(-0.014,0.006)                                        | -0.007**<br>(-0.011,-0.002)                                    | -0.002<br>(-0.006,0.001)                                        | -0.010***<br>(-0.012,-0.009)                                      |
| ACEi or ARB monotherapy                   | -0.016***<br>(-0.020,-0.012)                       | -0.039***<br>(-0.057,-0.020)                                    | -0.007<br>(-0.015,0.001)                                       | -0.009**<br>(-0.015,-0.003)                                     | -0.004***<br>(-0.006,-0.002)                                      |
| 2018-2019 season: ACEi or ARB +/- other   | 0.004*<br>(0.000,0.008)                            | 0.004<br>(-0.009,0.018)                                         | 0.004<br>(-0.003,0.010)                                        | -0.001<br>(-0.005,0.004)                                        | -0.001<br>(-0.003,0.002)                                          |
| 2018-2019 season: ACEi or ARB monotherapy | 0.005<br>(-0.001,0.010)                            | 0.040**<br>(0.015,0.065)                                        | 0.002<br>(-0.009,0.013)                                        | 0.002<br>(-0.006,0.009)                                         | 0.001<br>(-0.002,0.004)                                           |
| 2019-2020 season: ACEi or ARB +/- other   | 0.015***<br>(0.011,0.019)                          | 0.011<br>(-0.001,0.024)                                         | 0.007*<br>(0.002,0.013)                                        | 0.008***<br>(0.003,0.013)                                       | -0.001<br>(-0.004,0.001)                                          |
| 2019-2020 season: ACEi or ARB monotherapy | 0.017***<br>(0.012,0.022)                          | 0.035**<br>(0.013,0.057)                                        | 0.004<br>(-0.006,0.013)                                        | 0.012**<br>(0.004,0.020)                                        | -0.003*<br>(-0.006,-0.000)                                        |
| Demographics                              |                                                    |                                                                 |                                                                |                                                                 |                                                                   |
| Female                                    | -0.016***<br>(-0.017,-0.014)                       | -0.023***<br>(-0.028,-0.018)                                    | 0<br>(-0.002,0.003)                                            | -0.004***<br>(-0.006,-0.002)                                    | -0.011***<br>(-0.012,-0.010)                                      |
| Age categories                            |                                                    |                                                                 |                                                                |                                                                 |                                                                   |
| <35                                       | -0.006*<br>(-0.012,-0.000)                         | -0.029<br>(-0.078,0.020)                                        | 0.02<br>(-0.005,0.045)                                         | -0.01<br>(-0.028,0.008)                                         | -0.001<br>(-0.003,0.001)                                          |
| 35-44                                     | -0.008***<br>(-0.012,-0.005)                       | -0.028<br>(-0.056,0.000)                                        | 0.006<br>(-0.008,0.019)                                        | -0.004<br>(-0.016,0.008)                                        | 0.001<br>(-0.001,0.002)                                           |
| 45-54                                     | ref.                                               | ref.                                                            | ref.                                                           | ref.                                                            | ref.                                                              |
| 55-64                                     | 0.010***<br>(0.008,0.013)                          | 0.005<br>(-0.009,0.020)                                         | 0.001<br>(-0.005,0.008)                                        | 0.001<br>(-0.005,0.007)                                         | 0.001*<br>(0.000,0.002)                                           |
| 65-74                                     | 0.011***<br>(0.008,0.014)                          | -0.003<br>(-0.017,0.011)                                        | 0.001<br>(-0.006,0.008)                                        | -0.001<br>(-0.007,0.004)                                        | 0.009***<br>(0.007,0.010)                                         |
| 75-84                                     | 0.029***<br>(0.026,0.032)                          | -0.026***<br>(-0.041,-0.012)                                    | -0.002<br>(-0.009,0.004)                                       | -0.005<br>(-0.011,0.001)                                        | 0.024***<br>(0.023,0.026)                                         |
| 85+                                       | 0.045***<br>(0.041,0.049)                          | -0.072***<br>(-0.087,-0.057)                                    | -0.010**<br>(-0.017,-0.003)                                    | -0.014***<br>(-0.020,-0.008)                                    | 0.063***<br>(0.061,0.065)                                         |
| Insurance coverage type                   |                                                    |                                                                 |                                                                |                                                                 |                                                                   |
| Medicare Advantage                        | ref.                                               | ref.                                                            | ref.                                                           | ref.                                                            | ref.                                                              |
| Commercial                                | -0.032***<br>(-0.035,-0.030)                       | 0.01<br>(-0.001,0.021)                                          | 0.001<br>(-0.004,0.006)                                        | 0.003<br>(-0.002,0.007)                                         | -0.001**<br>(-0.002,-0.000)                                       |
| Census region                             | -0.045**<br>(-0.075,-0.016)                        | 0.196*<br>(0.016,0.375)                                         | -0.011<br>(-0.086,0.064)                                       | 0.009<br>(-0.068,0.087)                                         | -0.023*<br>(-0.044,-0.002)                                        |
| Unknown/other                             | ref.                                               | ref.                                                            | ref.                                                           | ref.                                                            | ref.                                                              |
| New England                               | ref.                                               | ref.                                                            | ref.                                                           | ref.                                                            | ref.                                                              |
| Mid Atlantic                              | -0.008***<br>(-0.012,-0.003)                       | 0.017*<br>(0.003,0.031)                                         | 0.021***<br>(0.015,0.028)                                      | 0.021***<br>(0.016,0.026)                                       | -0.005**<br>(-0.008,-0.002)                                       |
| South Atlantic                            | -0.001<br>(-0.005,0.003)                           | 0.122***<br>(0.110,0.134)                                       | 0.016***<br>(0.011,0.021)                                      | 0.003<br>(-0.002,0.007)                                         | -0.016***<br>(-0.018,-0.013)                                      |

## Sensitivity analysis: ACEi/ARB monotherapy

|                               | (6)                                         | (7)                                                      | (8)                                                     | (9)                                                      | (10)                                                      |
|-------------------------------|---------------------------------------------|----------------------------------------------------------|---------------------------------------------------------|----------------------------------------------------------|-----------------------------------------------------------|
|                               | Inpatient stay<br>(95% confidence interval) | Inpatient stay with ICU/CCU<br>(95% confidence interval) | Inpatient stay with ARD dx<br>(95% confidence interval) | Inpatient stay with ARDS dx<br>(95% confidence interval) | Died same or following month<br>(95% confidence interval) |
| E North Central               | 0.018***<br>(0.013,0.022)                   | 0.073***<br>(0.060,0.086)                                | 0.003<br>(-0.002,0.009)                                 | 0<br>(-0.004,0.004)                                      | -0.009***<br>(-0.012,-0.007)                              |
| E South Central               | 0.011***<br>(0.007,0.016)                   | 0.070***<br>(0.056,0.085)                                | 0.018***<br>(0.011,0.024)                               | -0.001<br>(-0.006,0.004)                                 | -0.008***<br>(-0.011,-0.006)                              |
| W North Central               | 0.027***<br>(0.022,0.032)                   | 0.093***<br>(0.079,0.107)                                | 0.004<br>(-0.002,0.010)                                 | 0.006*<br>(0.001,0.011)                                  | -0.007***<br>(-0.010,-0.004)                              |
| W South Central               | 0.014***<br>(0.010,0.018)                   | 0.111***<br>(0.097,0.124)                                | 0.017***<br>(0.011,0.023)                               | 0.003<br>(-0.002,0.007)                                  | -0.011***<br>(-0.014,-0.009)                              |
| Mountain                      | -0.033***<br>(-0.037,-0.028)                | 0.122***<br>(0.103,0.141)                                | -0.007<br>(-0.015,0.000)                                | 0.008*<br>(0.001,0.016)                                  | -0.019***<br>(-0.022,-0.016)                              |
| Pacific                       | -0.002<br>(-0.007,0.004)                    | 0.170***<br>(0.151,0.189)                                | 0.008<br>(-0.000,0.017)                                 | 0.001<br>(-0.006,0.007)                                  | -0.016***<br>(-0.019,-0.013)                              |
| Race/ethnicity                | -0.007***<br>(-0.010,-0.005)                | 0.020***<br>(0.013,0.028)                                | 0.004*<br>(0.001,0.008)                                 | 0.009***<br>(0.006,0.012)                                | -0.002**<br>(-0.003,-0.001)                               |
| Unknown/other                 | ref.                                        | ref.                                                     | ref.                                                    | ref.                                                     | ref.                                                      |
| White                         | 0.011***<br>(0.009,0.013)                   | -0.010**<br>(-0.017,-0.003)                              | 0.005**<br>(0.002,0.008)                                | 0.008***<br>(0.006,0.011)                                | 0.004***<br>(0.003,0.005)                                 |
| Black                         | -0.016***<br>(-0.018,-0.013)                | 0.086***<br>(0.077,0.095)                                | 0.011***<br>(0.006,0.015)                               | 0.010***<br>(0.007,0.014)                                | -0.008***<br>(-0.009,-0.006)                              |
| Hispanic                      | -0.012***<br>(-0.016,-0.007)                | 0.020*<br>(0.002,0.039)                                  | 0.002<br>(-0.007,0.010)                                 | 0.007<br>(-0.000,0.014)                                  | -0.001<br>(-0.004,0.001)                                  |
| Asian                         | ref.                                        | ref.                                                     | ref.                                                    | ref.                                                     | ref.                                                      |
| Comorbidities                 | 0.011***<br>(0.009,0.013)                   | 0.012**<br>(0.004,0.019)                                 | 0.005**<br>(0.001,0.009)                                | 0.004**<br>(0.001,0.007)                                 | 0.005***<br>(0.004,0.006)                                 |
| No diabetes                   | 0.029***<br>(0.027,0.031)                   | 0.008**<br>(0.002,0.014)                                 | -0.002<br>(-0.005,0.001)                                | 0.002<br>(-0.000,0.004)                                  | 0.008***<br>(0.006,0.009)                                 |
| Diabetes without CC           | 0.023***<br>(0.020,0.026)                   | -0.012**<br>(-0.019,-0.005)                              | -0.003<br>(-0.006,0.000)                                | -0.003*<br>(-0.005,-0.000)                               | -0.001<br>(-0.003,0.001)                                  |
| Diabetes with CC              | 0.020***<br>(0.018,0.022)                   | 0.027***<br>(0.022,0.033)                                | 0.001<br>(-0.001,0.004)                                 | -0.002<br>(-0.004,0.000)                                 | 0.008***<br>(0.006,0.009)                                 |
| Uncomp hypertension           | 0.093***<br>(0.091,0.096)                   | 0.077***<br>(0.071,0.082)                                | 0.017***<br>(0.015,0.020)                               | 0.002<br>(-0.000,0.004)                                  | 0.036***<br>(0.035,0.038)                                 |
| Comp hypertension             | 0.061***<br>(0.059,0.063)                   | -0.010***<br>(-0.015,-0.005)                             | 0.015***<br>(0.013,0.018)                               | -0.007***<br>(-0.009,-0.006)                             | -0.002***<br>(-0.003,-0.001)                              |
| Coronary artery disease       | 0.019***<br>(0.017,0.022)                   | 0.012***<br>(0.005,0.018)                                | -0.001<br>(-0.004,0.003)                                | 0.001<br>(-0.001,0.003)                                  | 0.023***<br>(0.021,0.025)                                 |
| Congestive heart failure      | 0.046***<br>(0.042,0.051)                   | 0.035***<br>(0.025,0.045)                                | -0.003<br>(-0.008,0.002)                                | 0<br>(-0.004,0.004)                                      | 0.059***<br>(0.056,0.063)                                 |
| Chronic pulmonary diseases    | 0.122***<br>(0.115,0.130)                   | 0.01<br>(-0.003,0.024)                                   | 0.003<br>(-0.004,0.009)                                 | -0.010***<br>(-0.014,-0.006)                             | 0.136***<br>(0.130,0.142)                                 |
| Renal failure                 | 0.064***<br>(0.056,0.073)                   | -0.008<br>(-0.025,0.009)                                 | -0.001<br>(-0.009,0.007)                                | -0.010***<br>(-0.015,-0.004)                             | 0.027***<br>(0.021,0.033)                                 |
| Liver failure                 | 0.036***<br>(0.033,0.040)                   | 0.018***<br>(0.009,0.027)                                | 0<br>(-0.004,0.005)                                     | -0.003*<br>(-0.006,-0.000)                               | 0.028***<br>(0.026,0.030)                                 |
| Metastatic cancer             | -0.008***<br>(-0.011,-0.006)                | 0.017***<br>(0.010,0.023)                                | 0.004**<br>(0.001,0.008)                                | 0.001<br>(-0.001,0.003)                                  | 0.018***<br>(0.017,0.020)                                 |
| Lymphoma                      | 0.062***                                    | 0.062***                                                 | 0.005***                                                | -0.002*                                                  | 0.024***                                                  |
| Non-metastatic solid tumor    |                                             |                                                          |                                                         |                                                          |                                                           |
| Peripheral vascular disorders |                                             |                                                          |                                                         |                                                          |                                                           |
| Cardiac arrhythmias           |                                             |                                                          |                                                         |                                                          |                                                           |

**Sensitivity analysis: ACEi/ARB monotherapy**

|                                                          | (6)                                         | (7)                                                      | (8)                                                     | (9)                                                      | (10)                                                      |
|----------------------------------------------------------|---------------------------------------------|----------------------------------------------------------|---------------------------------------------------------|----------------------------------------------------------|-----------------------------------------------------------|
|                                                          | Inpatient stay<br>(95% confidence interval) | Inpatient stay with ICU/CCU<br>(95% confidence interval) | Inpatient stay with ARD dx<br>(95% confidence interval) | Inpatient stay with ARDS dx<br>(95% confidence interval) | Died same or following month<br>(95% confidence interval) |
| Rheumatoid arthritis/collagen vascular diseases          | (0.060,0.064)<br>0.016***                   | (0.057,0.067)<br>-0.005                                  | (0.002,0.007)<br>-0.007**                               | (-0.004,-0.000)<br>0                                     | (0.023,0.026)<br>0.004***                                 |
| Coagulopathy                                             | (0.013,0.020)<br>0.029***                   | (-0.016,0.006)<br>0.032***                               | (-0.012,-0.002)<br>-0.004                               | (-0.004,0.004)<br>0.002                                  | (0.002,0.006)<br>0.035***                                 |
| Obesity                                                  | (0.024,0.033)<br>-0.002                     | (0.023,0.041)<br>0.013***                                | (-0.008,0.000)<br>0.004                                 | (-0.001,0.005)<br>0.009***                               | (0.032,0.038)<br>-0.008***                                |
| Chronic/acute deep vein thrombosis or pulmonary embolism | (-0.004,0.000)<br>0.061***                  | (0.006,0.021)<br>0.050***                                | (-0.000,0.007)<br>0.003                                 | (0.006,0.012)<br>0.002                                   | (-0.010,-0.007)<br>0.030***                               |
| Hemorrhagic or ischemic stroke                           | (0.055,0.067)<br>0.016***                   | (0.039,0.061)<br>0.032***                                | (-0.003,0.009)<br>0.002                                 | (-0.002,0.006)<br>-0.004**                               | (0.026,0.034)<br>0.043***                                 |
| Valvular disease                                         | (0.013,0.019)<br>-0.009***                  | (0.024,0.040)<br>0.045***                                | (-0.001,0.006)<br>0.007***                              | (-0.007,-0.001)<br>-0.002                                | (0.040,0.045)<br>0.017***                                 |
| Constant                                                 | (-0.012,-0.006)<br>0.058***                 | (0.038,0.052)<br>0.312***                                | (0.003,0.010)<br>0.020***                               | (-0.004,0.001)<br>0.034***                               | (0.015,0.019)<br>0.012***                                 |
| N                                                        | (0.053,0.063)<br>1059474                    | (0.292,0.332)<br>167330                                  | (0.011,0.029)<br>167330                                 | (0.027,0.042)<br>167330                                  | (0.009,0.015)<br>1057707                                  |
| N_clust                                                  | 728455                                      | 147846                                                   | 147846                                                  | 147846                                                   | 727311                                                    |
| p                                                        | <0.001                                      | <0.001                                                   | <0.001                                                  | <0.001                                                   | <0.001                                                    |
| R-squared                                                | 0.081                                       | 0.037                                                    | 0.006                                                   | 0.008                                                    | 0.076                                                     |

|                                           | Sensitivity analysis: Dropping people with comorbidities (other than hypertension) |                                                                  |                                                                 |                                                                  |                                                                   |
|-------------------------------------------|------------------------------------------------------------------------------------|------------------------------------------------------------------|-----------------------------------------------------------------|------------------------------------------------------------------|-------------------------------------------------------------------|
|                                           | (11)<br>Inpatient stay<br>(95% confidence interval)                                | (12)<br>Inpatient stay with ICU/CCU<br>(95% confidence interval) | (13)<br>Inpatient stay with ARD dx<br>(95% confidence interval) | (14)<br>Inpatient stay with ARDS dx<br>(95% confidence interval) | (15)<br>Died same or following month<br>(95% confidence interval) |
| Flu season / medication type              |                                                                                    |                                                                  |                                                                 |                                                                  |                                                                   |
| 2017-2018 flu season                      | ref.                                                                               | ref.                                                             | ref.                                                            | ref.                                                             | ref.                                                              |
| 2018-2019 flu season                      | 0.002<br>(-0.001,0.006)                                                            | 0.02<br>(-0.032,0.072)                                           | 0.030**<br>(0.009,0.051)                                        | 0.006<br>(-0.005,0.017)                                          | 0<br>(-0.002,0.002)                                               |
| 2019-2020 flu season                      | 0.032***<br>(0.028,0.035)                                                          | 0.068**<br>(0.024,0.111)                                         | 0.029***<br>(0.014,0.045)                                       | 0.052***<br>(0.039,0.065)                                        | 0.007***<br>(0.005,0.009)                                         |
| Other medications only                    | ref.                                                                               | ref.                                                             | ref.                                                            | ref.                                                             | ref.                                                              |
| ACEi or ARB plus/minus other medications  | -0.006***<br>(-0.009,-0.003)                                                       | -0.001<br>(-0.049,0.046)                                         | 0.009<br>(-0.008,0.026)                                         | 0.003<br>(-0.007,0.013)                                          | -0.003***<br>(-0.004,-0.001)                                      |
| ACEi or ARB monotherapy                   |                                                                                    |                                                                  |                                                                 |                                                                  |                                                                   |
| 2018-2019 season: ACEi or ARB +/- other   | -0.003<br>(-0.007,0.001)                                                           | 0.004<br>(-0.062,0.071)                                          | -0.013<br>(-0.041,0.014)                                        | 0.001<br>(-0.015,0.017)                                          | 0.001<br>(-0.001,0.003)                                           |
| 2018-2019 season: ACEi or ARB monotherapy |                                                                                    |                                                                  |                                                                 |                                                                  |                                                                   |
| 2019-2020 season: ACEi or ARB +/- other   | -0.001<br>(-0.006,0.003)                                                           | 0.05<br>(-0.006,0.106)                                           | -0.022*<br>(-0.043,-0.001)                                      | -0.001<br>(-0.019,0.016)                                         | -0.001<br>(-0.003,0.001)                                          |
| 2019-2020 season: ACEi or ARB monotherapy |                                                                                    |                                                                  |                                                                 |                                                                  |                                                                   |
| Demographics                              |                                                                                    |                                                                  |                                                                 |                                                                  |                                                                   |
| Female                                    | -0.010***<br>(-0.012,-0.008)                                                       | -0.025*<br>(-0.048,-0.003)                                       | -0.01<br>(-0.019,0.000)                                         | -0.008<br>(-0.018,0.002)                                         | -0.003***<br>(-0.004,-0.002)                                      |
| Age categories                            |                                                                                    |                                                                  |                                                                 |                                                                  |                                                                   |
| <35                                       | -0.013***<br>(-0.017,-0.010)                                                       | -0.125<br>(-0.286,0.037)                                         | 0.089<br>(-0.025,0.202)                                         | -0.017<br>(-0.074,0.040)                                         | -0.001**<br>(-0.002,-0.000)                                       |
| 35-44                                     | -0.007***<br>(-0.009,-0.004)                                                       | -0.151***<br>(-0.229,-0.074)                                     | 0.014<br>(-0.026,0.055)                                         | -0.022<br>(-0.053,0.009)                                         | -0.001<br>(-0.001,0.000)                                          |
| 45-54                                     | ref.                                                                               | ref.                                                             | ref.                                                            | ref.                                                             | ref.                                                              |
| 55-64                                     | 0.003**<br>(0.001,0.006)                                                           | -0.041<br>(-0.091,0.009)                                         | -0.004<br>(-0.027,0.018)                                        | 0.006<br>(-0.018,0.029)                                          | 0.001***<br>(0.001,0.002)                                         |
| 65-74                                     | 0.006***<br>(0.003,0.009)                                                          | -0.056*<br>(-0.109,-0.003)                                       | -0.017<br>(-0.041,0.008)                                        | 0.009<br>(-0.015,0.032)                                          | 0.001*<br>(0.000,0.002)                                           |
| 75-84                                     | 0.028***<br>(0.024,0.032)                                                          | -0.077**<br>(-0.132,-0.022)                                      | -0.011<br>(-0.037,0.014)                                        | 0.005<br>(-0.019,0.029)                                          | 0.008***<br>(0.007,0.010)                                         |
| 85+                                       | 0.074***<br>(0.068,0.079)                                                          | -0.139***<br>(-0.196,-0.083)                                     | -0.022<br>(-0.048,0.004)                                        | -0.007<br>(-0.032,0.017)                                         | 0.036***<br>(0.032,0.039)                                         |
| Insurance coverage type                   |                                                                                    |                                                                  |                                                                 |                                                                  |                                                                   |
| Medicare Advantage                        | ref.                                                                               | ref.                                                             | ref.                                                            | ref.                                                             | ref.                                                              |
| Commercial                                | -0.013***<br>(-0.015,-0.010)                                                       | -0.043*<br>(-0.083,-0.002)                                       | -0.01<br>(-0.028,0.009)                                         | 0.006<br>(-0.011,0.024)                                          | -0.004***<br>(-0.005,-0.003)                                      |
| Census region                             |                                                                                    |                                                                  |                                                                 |                                                                  |                                                                   |
| Unknown/other                             | -0.034***<br>(-0.053,-0.014)                                                       | 0.755***<br>(0.693,0.816)                                        | -0.025*<br>(-0.050,-0.000)                                      | -0.062***<br>(-0.089,-0.035)                                     | 0.008<br>(-0.018,0.034)                                           |
| New England                               | ref.                                                                               | ref.                                                             | ref.                                                            | ref.                                                             | ref.                                                              |
| Mid Atlantic                              | -0.002<br>(-0.007,0.004)                                                           | 0.065*<br>(0.008,0.123)                                          | 0.015<br>(-0.008,0.038)                                         | 0.025<br>(-0.003,0.053)                                          | 0.002<br>(-0.001,0.005)                                           |
| South Atlantic                            | -0.004<br>(-0.009,0.001)                                                           | 0.164***<br>(0.113,0.214)                                        | 0.012<br>(-0.007,0.032)                                         | -0.009<br>(-0.032,0.014)                                         | -0.001<br>(-0.004,0.001)                                          |

|                               | Sensitivity analysis: Dropping people with comorbidities (other than hypertension) |                                                          |                                                         |                                                          |                                                           |
|-------------------------------|------------------------------------------------------------------------------------|----------------------------------------------------------|---------------------------------------------------------|----------------------------------------------------------|-----------------------------------------------------------|
|                               | (11)                                                                               | (12)                                                     | (13)                                                    | (14)                                                     | (15)                                                      |
|                               | Inpatient stay<br>(95% confidence interval)                                        | Inpatient stay with ICU/CCU<br>(95% confidence interval) | Inpatient stay with ARD dx<br>(95% confidence interval) | Inpatient stay with ARDS dx<br>(95% confidence interval) | Died same or following month<br>(95% confidence interval) |
| E North Central               | 0.007**<br>(0.002,0.013)                                                           | 0.111***<br>(0.058,0.165)                                | 0.018<br>(-0.003,0.039)                                 | 0<br>(-0.024,0.024)                                      | 0<br>(-0.003,0.002)                                       |
| E South Central               | 0.001<br>(-0.005,0.007)                                                            | 0.116***<br>(0.055,0.176)                                | 0.01<br>(-0.014,0.034)                                  | -0.004<br>(-0.030,0.023)                                 | -0.001<br>(-0.003,0.002)                                  |
| W North Central               | 0.009**<br>(0.003,0.015)                                                           | 0.124***<br>(0.063,0.184)                                | 0.021<br>(-0.004,0.046)                                 | -0.002<br>(-0.028,0.025)                                 | 0.002<br>(-0.001,0.004)                                   |
| W South Central               | 0.001<br>(-0.004,0.007)                                                            | 0.142***<br>(0.086,0.199)                                | 0.025*<br>(0.002,0.049)                                 | 0.007<br>(-0.019,0.034)                                  | 0<br>(-0.002,0.003)                                       |
| Mountain                      | -0.005<br>(-0.011,0.001)                                                           | 0.161***<br>(0.087,0.235)                                | -0.005<br>(-0.031,0.020)                                | 0.019<br>(-0.017,0.055)                                  | -0.002<br>(-0.005,0.001)                                  |
| Pacific                       | 0<br>(-0.007,0.006)                                                                | 0.173***<br>(0.093,0.253)                                | -0.004<br>(-0.032,0.024)                                | -0.008<br>(-0.041,0.025)                                 | -0.003<br>(-0.005,0.000)                                  |
| Race/ethnicity                | 0.001<br>(-0.002,0.004)                                                            | 0.056**<br>(0.022,0.089)                                 | 0.002<br>(-0.012,0.016)                                 | 0.009<br>(-0.006,0.023)                                  | 0<br>(-0.001,0.001)                                       |
| Unknown/other                 | ref.                                                                               | ref.                                                     | ref.                                                    | ref.                                                     | ref.                                                      |
| White                         |                                                                                    |                                                          |                                                         |                                                          |                                                           |
| Black                         | 0.008***<br>(0.006,0.011)                                                          | 0<br>(-0.031,0.032)                                      | 0.003<br>(-0.010,0.016)                                 | 0.01<br>(-0.003,0.023)                                   | 0.001<br>(-0.000,0.002)                                   |
| Hispanic                      | -0.001<br>(-0.004,0.001)                                                           | 0.092***<br>(0.054,0.130)                                | 0.016<br>(-0.001,0.034)                                 | 0.035***<br>(0.015,0.055)                                | -0.001*<br>(-0.003,-0.000)                                |
| Asian                         | -0.007**<br>(-0.011,-0.002)                                                        | 0.029<br>(-0.045,0.103)                                  | -0.018<br>(-0.042,0.007)                                | 0.018<br>(-0.018,0.055)                                  | -0.002<br>(-0.004,0.000)                                  |
| Comorbidities                 |                                                                                    |                                                          |                                                         |                                                          |                                                           |
| No diabetes                   |                                                                                    |                                                          |                                                         |                                                          |                                                           |
| Diabetes without CC           |                                                                                    |                                                          |                                                         |                                                          |                                                           |
| Diabetes with CC              |                                                                                    |                                                          |                                                         |                                                          |                                                           |
| Uncomp hypertension           | ref.                                                                               | ref.                                                     | ref.                                                    | ref.                                                     | ref.                                                      |
| Comp hypertension             | 0.014***<br>(0.007,0.021)                                                          | -0.009<br>(-0.068,0.050)                                 | -0.009<br>(-0.032,0.013)                                | -0.017<br>(-0.036,0.003)                                 | 0.006**<br>(0.002,0.010)                                  |
| Coronary artery disease       |                                                                                    |                                                          |                                                         |                                                          |                                                           |
| Congestive heart failure      |                                                                                    |                                                          |                                                         |                                                          |                                                           |
| Chronic pulmonary diseases    |                                                                                    |                                                          |                                                         |                                                          |                                                           |
| Renal failure                 |                                                                                    |                                                          |                                                         |                                                          |                                                           |
| Liver failure                 |                                                                                    |                                                          |                                                         |                                                          |                                                           |
| Metastatic cancer             |                                                                                    |                                                          |                                                         |                                                          |                                                           |
| Lymphoma                      |                                                                                    |                                                          |                                                         |                                                          |                                                           |
| Non-metastatic solid tumor    |                                                                                    |                                                          |                                                         |                                                          |                                                           |
| Peripheral vascular disorders |                                                                                    |                                                          |                                                         |                                                          |                                                           |
| Cardiac arrhythmias           |                                                                                    |                                                          |                                                         |                                                          |                                                           |

|                                                          | Sensitivity analysis: Dropping people with comorbidities (other than hypertension) |                                                          |                                                         |                                                          |                                                           |
|----------------------------------------------------------|------------------------------------------------------------------------------------|----------------------------------------------------------|---------------------------------------------------------|----------------------------------------------------------|-----------------------------------------------------------|
|                                                          | (11)                                                                               | (12)                                                     | (13)                                                    | (14)                                                     | (15)                                                      |
|                                                          | Inpatient stay<br>(95% confidence interval)                                        | Inpatient stay with ICU/CCU<br>(95% confidence interval) | Inpatient stay with ARD dx<br>(95% confidence interval) | Inpatient stay with ARDS dx<br>(95% confidence interval) | Died same or following month<br>(95% confidence interval) |
| Rheumatoid arthritis/collagen vascular diseases          |                                                                                    |                                                          |                                                         |                                                          |                                                           |
| Coagulopathy                                             |                                                                                    |                                                          |                                                         |                                                          |                                                           |
| Obesity                                                  |                                                                                    |                                                          |                                                         |                                                          |                                                           |
| Chronic/acute deep vein thrombosis or pulmonary embolism |                                                                                    |                                                          |                                                         |                                                          |                                                           |
| Hemorrhagic or ischemic stroke                           |                                                                                    |                                                          |                                                         |                                                          |                                                           |
| Valvular disease                                         |                                                                                    |                                                          |                                                         |                                                          |                                                           |
| Constant                                                 | 0.027***<br>(0.020,0.033)                                                          | 0.268***<br>(0.190,0.347)                                | 0.027<br>(-0.003,0.058)                                 | 0.006<br>(-0.026,0.038)                                  | 0.006***<br>(0.003,0.009)                                 |
| N                                                        | 200778                                                                             | 7696                                                     | 7696                                                    | 7696                                                     | 200508                                                    |
| N_clust                                                  | 175494                                                                             | 7647                                                     | 7647                                                    | 7647                                                     | 175251                                                    |
| p                                                        | <0.001                                                                             |                                                          |                                                         |                                                          | <0.001                                                    |
| R-squared                                                | 0.022                                                                              | 0.033                                                    | 0.007                                                   | 0.023                                                    | 0.015                                                     |

|                                           | Sensitivity analysis: limiting analysis to strict flu season (dropping summer months) |                                                                  |                                                                 |                                                                  |                                                                   |
|-------------------------------------------|---------------------------------------------------------------------------------------|------------------------------------------------------------------|-----------------------------------------------------------------|------------------------------------------------------------------|-------------------------------------------------------------------|
|                                           | (16)<br>Inpatient stay<br>(95% confidence interval)                                   | (17)<br>Inpatient stay with ICU/CCU<br>(95% confidence interval) | (18)<br>Inpatient stay with ARD dx<br>(95% confidence interval) | (19)<br>Inpatient stay with ARDS dx<br>(95% confidence interval) | (20)<br>Died same or following month<br>(95% confidence interval) |
| Flu season / medication type              |                                                                                       |                                                                  |                                                                 |                                                                  |                                                                   |
| 2017-2018 flu season                      | ref.                                                                                  | ref.                                                             | ref.                                                            | ref.                                                             | ref.                                                              |
| 2018-2019 flu season                      | 0<br>(-0.004,0.003)                                                                   | 0.009<br>(-0.002,0.019)                                          | 0.017***<br>(0.012,0.022)                                       | -0.007***<br>(-0.010,-0.003)                                     | 0<br>(-0.002,0.002)                                               |
| 2019-2020 flu season                      | 0.003*<br>(0.000,0.007)                                                               | 0.030***<br>(0.020,0.041)                                        | 0.017***<br>(0.011,0.022)                                       | 0.010***<br>(0.006,0.014)                                        | 0.017***<br>(0.015,0.020)                                         |
| Other medications only                    | ref.                                                                                  | ref.                                                             | ref.                                                            | ref.                                                             | ref.                                                              |
| ACEi or ARB plus/minus other medications  | -0.016***<br>(-0.019,-0.013)                                                          | -0.01<br>(-0.021,0.000)                                          | -0.007**<br>(-0.011,-0.002)                                     | -0.003<br>(-0.006,0.001)                                         | -0.009***<br>(-0.010,-0.007)                                      |
| ACEi or ARB monotherapy                   |                                                                                       |                                                                  |                                                                 |                                                                  |                                                                   |
| 2018-2019 season: ACEi or ARB +/- other   | 0.002<br>(-0.002,0.006)                                                               | 0.01<br>(-0.004,0.025)                                           | 0.001<br>(-0.006,0.008)                                         | 0<br>(-0.005,0.004)                                              | 0<br>(-0.003,0.002)                                               |
| 2018-2019 season: ACEi or ARB monotherapy |                                                                                       |                                                                  |                                                                 |                                                                  |                                                                   |
| 2019-2020 season: ACEi or ARB +/- other   | 0.008***<br>(0.004,0.012)                                                             | 0.012<br>(-0.003,0.026)                                          | 0.008*<br>(0.001,0.014)                                         | 0.008**<br>(0.002,0.013)                                         | -0.005***<br>(-0.008,-0.002)                                      |
| 2019-2020 season: ACEi or ARB monotherapy |                                                                                       |                                                                  |                                                                 |                                                                  |                                                                   |
| Demographics                              |                                                                                       |                                                                  |                                                                 |                                                                  |                                                                   |
| Female                                    | -0.011***<br>(-0.012,-0.009)                                                          | -0.024***<br>(-0.030,-0.017)                                     | 0.001<br>(-0.002,0.004)                                         | -0.001<br>(-0.003,0.001)                                         | -0.009***<br>(-0.010,-0.008)                                      |
| Age categories                            |                                                                                       |                                                                  |                                                                 |                                                                  |                                                                   |
| <35                                       | 0<br>(-0.006,0.006)                                                                   | -0.051<br>(-0.111,0.009)                                         | 0.012<br>(-0.020,0.044)                                         | -0.014<br>(-0.035,0.006)                                         | -0.001<br>(-0.003,0.001)                                          |
| 35-44                                     | -0.005**<br>(-0.009,-0.002)                                                           | -0.027<br>(-0.063,0.009)                                         | 0.005<br>(-0.013,0.023)                                         | -0.008<br>(-0.022,0.006)                                         | 0.001<br>(-0.000,0.002)                                           |
| 45-54                                     | ref.                                                                                  | ref.                                                             | ref.                                                            | ref.                                                             | ref.                                                              |
| 55-64                                     | 0.009***<br>(0.006,0.012)                                                             | 0.005<br>(-0.014,0.023)                                          | 0<br>(-0.009,0.009)                                             | -0.002<br>(-0.009,0.005)                                         | 0<br>(-0.001,0.001)                                               |
| 65-74                                     | 0.009***<br>(0.006,0.012)                                                             | -0.009<br>(-0.027,0.009)                                         | -0.002<br>(-0.011,0.007)                                        | -0.003<br>(-0.010,0.004)                                         | 0.006***<br>(0.005,0.008)                                         |
| 75-84                                     | 0.027***<br>(0.023,0.030)                                                             | -0.033***<br>(-0.051,-0.015)                                     | -0.005<br>(-0.013,0.004)                                        | -0.007<br>(-0.014,0.000)                                         | 0.022***<br>(0.020,0.023)                                         |
| 85+                                       | 0.049***<br>(0.045,0.053)                                                             | -0.078***<br>(-0.097,-0.059)                                     | -0.012*<br>(-0.021,-0.003)                                      | -0.015***<br>(-0.022,-0.008)                                     | 0.062***<br>(0.060,0.065)                                         |
| Insurance coverage type                   |                                                                                       |                                                                  |                                                                 |                                                                  |                                                                   |
| Medicare Advantage                        | ref.                                                                                  | ref.                                                             | ref.                                                            | ref.                                                             | ref.                                                              |
| Commercial                                | -0.028***<br>(-0.030,-0.025)                                                          | 0.006<br>(-0.007,0.019)                                          | 0.002<br>(-0.005,0.008)                                         | 0.004<br>(-0.001,0.009)                                          | 0.001<br>(-0.000,0.002)                                           |
| Census region                             |                                                                                       |                                                                  |                                                                 |                                                                  |                                                                   |
| Unknown/other                             | -0.035<br>(-0.071,0.000)                                                              | 0.219*<br>(0.012,0.426)                                          | -0.003<br>(-0.099,0.094)                                        | 0.016<br>(-0.085,0.117)                                          | -0.024*<br>(-0.048,-0.000)                                        |
| New England                               | ref.                                                                                  | ref.                                                             | ref.                                                            | ref.                                                             | ref.                                                              |
| Mid Atlantic                              | 0<br>(-0.005,0.005)                                                                   | 0.018*<br>(0.002,0.035)                                          | 0.021***<br>(0.014,0.029)                                       | 0.022***<br>(0.015,0.028)                                        | 0.002<br>(-0.001,0.006)                                           |
| South Atlantic                            | -0.012***<br>(-0.017,-0.008)                                                          | 0.121***<br>(0.107,0.135)                                        | 0.014***<br>(0.007,0.020)                                       | -0.004<br>(-0.009,0.001)                                         | -0.019***<br>(-0.022,-0.016)                                      |

|                               | Sensitivity analysis: limiting analysis to strict flu season (dropping summer months) |                                                          |                                                         |                                                          |                                                           |
|-------------------------------|---------------------------------------------------------------------------------------|----------------------------------------------------------|---------------------------------------------------------|----------------------------------------------------------|-----------------------------------------------------------|
|                               | (16)                                                                                  | (17)                                                     | (18)                                                    | (19)                                                     | (20)                                                      |
|                               | Inpatient stay<br>(95% confidence interval)                                           | Inpatient stay with ICU/CCU<br>(95% confidence interval) | Inpatient stay with ARD dx<br>(95% confidence interval) | Inpatient stay with ARDS dx<br>(95% confidence interval) | Died same or following month<br>(95% confidence interval) |
| E North Central               | 0.008***<br>(0.003,0.013)                                                             | 0.073***<br>(0.058,0.089)                                | 0.004<br>(-0.003,0.011)                                 | -0.008**<br>(-0.013,-0.002)                              | -0.012***<br>(-0.015,-0.009)                              |
| E South Central               | -0.006*<br>(-0.011,-0.001)                                                            | 0.069***<br>(0.051,0.087)                                | 0.015***<br>(0.007,0.023)                               | -0.010**<br>(-0.016,-0.004)                              | -0.014***<br>(-0.017,-0.010)                              |
| W North Central               | 0.013***<br>(0.008,0.018)                                                             | 0.091***<br>(0.074,0.109)                                | 0.003<br>(-0.005,0.011)                                 | -0.004<br>(-0.010,0.002)                                 | -0.012***<br>(-0.015,-0.009)                              |
| W South Central               | -0.002<br>(-0.007,0.002)                                                              | 0.100***<br>(0.083,0.116)                                | 0.016***<br>(0.008,0.024)                               | -0.008**<br>(-0.014,-0.003)                              | -0.017***<br>(-0.020,-0.014)                              |
| Mountain                      | -0.040***<br>(-0.046,-0.035)                                                          | 0.115***<br>(0.091,0.138)                                | -0.009<br>(-0.019,0.001)                                | -0.006<br>(-0.014,0.002)                                 | -0.020***<br>(-0.024,-0.017)                              |
| Pacific                       | -0.008*<br>(-0.014,-0.001)                                                            | 0.180***<br>(0.158,0.203)                                | 0.005<br>(-0.006,0.015)                                 | -0.006<br>(-0.014,0.002)                                 | -0.017***<br>(-0.021,-0.013)                              |
| Race/ethnicity                | -0.007***<br>(-0.010,-0.005)                                                          | 0.013*<br>(0.003,0.023)                                  | 0.003<br>(-0.002,0.009)                                 | 0.005**<br>(0.001,0.009)                                 | 0<br>(-0.001,0.002)                                       |
| Unknown/other                 | ref.                                                                                  | ref.                                                     | ref.                                                    | ref.                                                     | ref.                                                      |
| White                         | 0.011***<br>(0.009,0.014)                                                             | -0.012**<br>(-0.021,-0.004)                              | 0.005*<br>(0.000,0.009)                                 | 0.010***<br>(0.007,0.014)                                | 0.004***<br>(0.002,0.005)                                 |
| Black                         | -0.015***<br>(-0.018,-0.013)                                                          | 0.079***<br>(0.068,0.090)                                | 0.010***<br>(0.004,0.015)                               | 0.007**<br>(0.003,0.011)                                 | -0.008***<br>(-0.010,-0.007)                              |
| Hispanic                      | -0.011***<br>(-0.016,-0.005)                                                          | 0.005<br>(-0.017,0.027)                                  | 0.002<br>(-0.009,0.012)                                 | 0.006<br>(-0.002,0.015)                                  | -0.002<br>(-0.005,0.001)                                  |
| Comorbidities                 | ref.                                                                                  | ref.                                                     | ref.                                                    | ref.                                                     | ref.                                                      |
| No diabetes                   | 0.006***<br>(0.004,0.009)                                                             | 0.012*<br>(0.003,0.022)                                  | 0.004<br>(-0.000,0.009)                                 | 0.003<br>(-0.001,0.006)                                  | 0.004***<br>(0.003,0.005)                                 |
| Diabetes without CC           | 0.026***<br>(0.024,0.028)                                                             | 0.006<br>(-0.001,0.013)                                  | -0.003<br>(-0.006,0.001)                                | 0<br>(-0.002,0.003)                                      | 0.007***<br>(0.006,0.008)                                 |
| Diabetes with CC              | 0.023***<br>(0.020,0.026)                                                             | -0.009*<br>(-0.018,-0.000)                               | -0.004<br>(-0.008,0.000)                                | 0<br>(-0.003,0.003)                                      | -0.001<br>(-0.003,0.001)                                  |
| Uncomp hypertension           | 0.018***<br>(0.016,0.020)                                                             | 0.031***<br>(0.025,0.038)                                | 0<br>(-0.003,0.004)                                     | -0.001<br>(-0.003,0.001)                                 | 0.006***<br>(0.004,0.007)                                 |
| Comp hypertension             | 0.101***<br>(0.098,0.104)                                                             | 0.078***<br>(0.072,0.085)                                | 0.018***<br>(0.015,0.022)                               | 0.004***<br>(0.002,0.007)                                | 0.038***<br>(0.037,0.040)                                 |
| Coronary artery disease       | 0.074***<br>(0.072,0.076)                                                             | -0.010**<br>(-0.016,-0.004)                              | 0.015***<br>(0.012,0.018)                               | -0.005***<br>(-0.007,-0.002)                             | 0<br>(-0.001,0.001)                                       |
| Congestive heart failure      | 0.019***<br>(0.016,0.022)                                                             | 0.012**<br>(0.004,0.020)                                 | 0<br>(-0.004,0.004)                                     | 0.001<br>(-0.002,0.004)                                  | 0.023***<br>(0.021,0.025)                                 |
| Chronic pulmonary diseases    | 0.041***<br>(0.036,0.047)                                                             | 0.037***<br>(0.024,0.050)                                | 0<br>(-0.006,0.007)                                     | 0.004<br>(-0.001,0.009)                                  | 0.057***<br>(0.053,0.062)                                 |
| Renal failure                 | 0.118***<br>(0.109,0.127)                                                             | 0.007<br>(-0.010,0.023)                                  | 0.001<br>(-0.007,0.010)                                 | -0.008**<br>(-0.013,-0.003)                              | 0.138***<br>(0.131,0.146)                                 |
| Liver failure                 | 0.064***<br>(0.054,0.073)                                                             | -0.009<br>(-0.030,0.012)                                 | -0.001<br>(-0.011,0.009)                                | -0.009**<br>(-0.015,-0.002)                              | 0.023***<br>(0.016,0.029)                                 |
| Metastatic cancer             | 0.038***<br>(0.034,0.042)                                                             | 0.021***<br>(0.010,0.032)                                | 0.002<br>(-0.003,0.008)                                 | -0.004*<br>(-0.007,-0.000)                               | 0.030***<br>(0.027,0.033)                                 |
| Lymphoma                      | -0.001<br>(-0.004,0.002)                                                              | 0.016***<br>(0.008,0.024)                                | 0.005*<br>(0.001,0.009)                                 | 0.004**<br>(0.001,0.007)                                 | 0.023***<br>(0.021,0.025)                                 |
| Non-metastatic solid tumor    | 0.063***                                                                              | 0.065***                                                 | 0.005**                                                 | -0.001                                                   | 0.023***                                                  |
| Peripheral vascular disorders |                                                                                       |                                                          |                                                         |                                                          |                                                           |
| Cardiac arrhythmias           |                                                                                       |                                                          |                                                         |                                                          |                                                           |

| Sensitivity analysis: limiting analysis to strict flu season (dropping summer months) |                                             |                                                          |                                                         |                                                          |                                                           |
|---------------------------------------------------------------------------------------|---------------------------------------------|----------------------------------------------------------|---------------------------------------------------------|----------------------------------------------------------|-----------------------------------------------------------|
|                                                                                       | (16)                                        | (17)                                                     | (18)                                                    | (19)                                                     | (20)                                                      |
|                                                                                       | Inpatient stay<br>(95% confidence interval) | Inpatient stay with ICU/CCU<br>(95% confidence interval) | Inpatient stay with ARD dx<br>(95% confidence interval) | Inpatient stay with ARDS dx<br>(95% confidence interval) | Died same or following month<br>(95% confidence interval) |
| Rheumatoid arthritis/collagen vascular diseases                                       | (0.061,0.066)<br>0.015***                   | (0.058,0.071)<br>-0.013                                  | (0.002,0.008)<br>-0.008*                                | (-0.003,0.002)<br>-0.001                                 | (0.021,0.025)<br>0.002                                    |
| Coagulopathy                                                                          | (0.010,0.019)<br>0.035***                   | (-0.026,0.001)<br>0.032***                               | (-0.014,-0.002)<br>-0.002                               | (-0.005,0.004)<br>0.001                                  | (-0.000,0.005)<br>0.039***                                |
| Obesity                                                                               | (0.030,0.041)<br>-0.002                     | (0.021,0.043)<br>0.016***                                | (-0.008,0.003)<br>0.004                                 | (-0.004,0.005)<br>0.008***                               | (0.035,0.043)<br>-0.008***                                |
| Chronic/acute deep vein thrombosis or pulmonary embolism                              | (-0.005,0.000)<br>0.053***                  | (0.007,0.026)<br>0.052***                                | (-0.001,0.009)<br>0.005                                 | (0.005,0.012)<br>0.002                                   | (-0.010,-0.006)<br>0.026***                               |
| Hemorrhagic or ischemic stroke                                                        | (0.046,0.061)<br>0.018***                   | (0.038,0.066)<br>0.030***                                | (-0.003,0.012)<br>0.005                                 | (-0.004,0.007)<br>-0.003                                 | (0.021,0.031)<br>0.044***                                 |
| Valvular disease                                                                      | (0.014,0.022)<br>-0.008***                  | (0.020,0.040)<br>0.053***                                | (-0.000,0.010)<br>0.008***                              | (-0.007,0.000)<br>-0.001                                 | (0.041,0.047)<br>0.016***                                 |
| Constant                                                                              | (-0.012,-0.005)<br>0.057***                 | (0.044,0.061)<br>0.314***                                | (0.003,0.012)<br>0.022***                               | (-0.004,0.003)<br>0.037***                               | (0.014,0.019)<br>0.013***                                 |
| N                                                                                     | (0.051,0.063)<br>738240                     | (0.290,0.338)<br>106917                                  | (0.010,0.033)<br>106917                                 | (0.028,0.046)<br>106917                                  | (0.010,0.017)<br>737059                                   |
| N_clust                                                                               | 556579                                      | 97383                                                    | 97383                                                   | 97383                                                    | 555729                                                    |
| p                                                                                     | <0.001                                      | <0.001                                                   | <0.001                                                  | <0.001                                                   | <0.001                                                    |
| R-squared                                                                             | 0.094                                       | 0.039                                                    | 0.007                                                   | 0.008                                                    | 0.082                                                     |
