# Supplementary material for: Association of outpatient use of renin–angiotensin–aldosterone system blockers on outcomes of acute respiratory illness during the COVID-19 pandemic: a cohort study
Source: PubMed Central journal article supplement — BMJ Open. 2022 Jul 6;12(7):e060305. doi: 10.1136/bmjopen-2021-060305 (PMC9260198; doi:10.1136/bmjopen-2021-060305), 2022-07-06
Supplement: bmjopen-2021-060305supp003.pdf [file bmjopen-2021-060305supp003.pdf]

## SUPPLEMENT MATERIAL S3

|                                                                                    | Primary analysis             |                             |                             |                              |                              |
|------------------------------------------------------------------------------------|------------------------------|-----------------------------|-----------------------------|------------------------------|------------------------------|
|                                                                                    | (1)                          | (2)                         | (3)                         | (4)                          | (5)                          |
|                                                                                    | Inpatient stay               | Inpatient stay with ICU/CCU | Inpatient stay with ARD dx  | Inpatient stay with ARDS dx  | Died same or following month |
| <b>Key coefficient estimates</b>                                                   |                              |                             |                             |                              |                              |
| <b>Season</b>                                                                      |                              |                             |                             |                              |                              |
| 2017-2018 flu season                                                               | ref.                         | ref.                        | ref.                        | ref.                         | ref.                         |
| 2018-2019 flu season                                                               | -0.001<br>(-0.004,0.002)     | 0.008<br>(-0.002,0.018)     | 0.013***<br>(0.008,0.017)   | -0.007***<br>(-0.010,-0.004) | 0.000<br>(-0.002,0.002)      |
| 2019-2020 flu season                                                               | 0.018***<br>(0.015,0.021)    | 0.035***<br>(0.026,0.044)   | 0.013***<br>(0.008,0.017)   | 0.013***<br>(0.009,0.016)    | 0.016***<br>(0.014,0.017)    |
| <b>HTN medication group</b>                                                        |                              |                             |                             |                              |                              |
| Other medications only                                                             | ref.                         | ref.                        | ref.                        | ref.                         | ref.                         |
| ACEi or ARB plus/minus other medications                                           | -0.019***<br>(-0.022,-0.016) | -0.009<br>(-0.019,0.001)    | -0.007**<br>(-0.011,-0.002) | -0.003<br>(-0.007,0.000)     | -0.009***<br>(-0.011,-0.008) |
| ACEi or ARB monotherapy                                                            | N/A                          | N/A                         | N/A                         | N/A                          | N/A                          |
| <b>Season/medication interactions</b>                                              |                              |                             |                             |                              |                              |
| 2018-2019 season: ACEi or ARB +/- other                                            | 0.004*<br>(0.001,0.008)      | 0.01<br>(-0.004,0.023)      | 0.004<br>(-0.003,0.010)     | 0<br>(-0.004,0.004)          | 0<br>(-0.002,0.002)          |
| 2018-2019 season: ACEi or ARB monotherapy                                          | N/A                          | N/A                         | N/A                         | N/A                          | N/A                          |
| 2019-2020 season: ACEi or ARB +/- other                                            | 0.015***<br>(0.012,0.019)    | 0.015*<br>(0.003,0.027)     | 0.007*<br>(0.001,0.012)     | 0.009***<br>(0.004,0.013)    | -0.002<br>(-0.004,0.001)     |
| 2019-2020 season: ACEi or ARB monotherapy                                          | N/A                          | N/A                         | N/A                         | N/A                          | N/A                          |
| Note: p-value for coefficients is for the null hypothesis that the coefficient = 0 |                              |                             |                             |                              |                              |
| <b>Marginal effects/predicted probability</b>                                      |                              |                             |                             |                              |                              |
| <b>Other hypertension medications only</b>                                         |                              |                             |                             |                              |                              |
| 2017/18                                                                            | 0.179<br>(0.177,0.181)       | 0.482<br>(0.474,0.489)      | 0.053<br>(0.050,0.056)      | 0.030<br>(0.028,0.033)       | 0.064<br>(0.062,0.065)       |
| 2018/19                                                                            | 0.178<br>(0.176,0.180)       | 0.490<br>(0.483,0.496)      | 0.066<br>(0.062,0.069)      | 0.023<br>(0.021,0.025)       | 0.064<br>(0.063,0.065)       |
| 2019/20                                                                            | 0.196<br>(0.195,0.198)       | 0.516<br>(0.511,0.521)      | 0.066<br>(0.063,0.068)      | 0.043<br>(0.041,0.045)       | 0.080<br>(0.078,0.081)       |

| Primary analysis                                |                           |                             |                            |                             |                              |
|-------------------------------------------------|---------------------------|-----------------------------|----------------------------|-----------------------------|------------------------------|
|                                                 | (1)                       | (2)                         | (3)                        | (4)                         | (5)                          |
|                                                 | Inpatient stay            | Inpatient stay with ICU/CCU | Inpatient stay with ARD dx | Inpatient stay with ARDS dx | Died same or following month |
| <b>ACEi or ARB plus/minus other medications</b> |                           |                             |                            |                             |                              |
| 2017/18                                         | 0.125<br>(0.124,0.127)    | 0.463<br>(0.456,0.470)      | 0.045<br>(0.042,0.048)     | 0.029<br>(0.027,0.031)      | 0.035<br>(0.034,0.035)       |
| 2018/19                                         | 0.128<br>(0.127,0.130)    | 0.481<br>(0.475,0.487)      | 0.061<br>(0.058,0.064)     | 0.021<br>(0.020,0.023)      | 0.034<br>(0.034,0.035)       |
| 2019/20                                         | 0.158<br>(0.157,0.160)    | 0.512<br>(0.508,0.517)      | 0.064<br>(0.062,0.066)     | 0.050<br>(0.048,0.052)      | 0.049<br>(0.048,0.049)       |
| <b>ACEi or ARB monotherapy</b>                  |                           |                             |                            |                             |                              |
| 2017/18                                         | N/A                       | N/A                         | N/A                        | N/A                         | N/A                          |
| 2018/19                                         | N/A                       | N/A                         | N/A                        | N/A                         | N/A                          |
| 2019/20                                         | N/A                       | N/A                         | N/A                        | N/A                         | N/A                          |
| <b>Risk ratios of marginal effects</b>          |                           |                             |                            |                             |                              |
| <b>Other hypertension medications only</b>      |                           |                             |                            |                             |                              |
| 2018/19 season vs. 2017/18                      | 0.994<br>(0.977,1.011)    | 1.017<br>(0.996,1.038)      | 1.236***<br>(1.136,1.337)  | 0.759***<br>(0.668,0.850)   | 0.999<br>(0.969,1.030)       |
| 2019/20 season vs. 2017/18                      | 1.099***<br>(1.081,1.116) | 1.072***<br>(1.053,1.092)   | 1.238***<br>(1.147,1.330)  | 1.414***<br>(1.278,1.550)   | 1.244***<br>(1.210,1.278)    |
| <b>ACEi or ARB plus/minus other medications</b> |                           |                             |                            |                             |                              |
| 2018/19 season vs. 2017/18                      | 1.025**<br>(1.009,1.042)  | 1.039***<br>(1.019,1.058)   | 1.360***<br>(1.251,1.469)  | 0.739***<br>(0.656,0.822)   | 0.993<br>(0.961,1.025)       |
| 2019/20 season vs. 2017/18                      | 1.264***<br>(1.245,1.282) | 1.107***<br>(1.088,1.126)   | 1.437***<br>(1.332,1.542)  | 1.731***<br>(1.580,1.882)   | 1.404***<br>(1.363,1.444)    |
| <b>ACEi or ARB monotherapy</b>                  |                           |                             |                            |                             |                              |
| 2018/19 season vs. 2017/18                      | N/A                       | N/A                         | N/A                        | N/A                         | N/A                          |
| 2019/20 season vs. 2017/18                      | N/A                       | N/A                         | N/A                        | N/A                         | N/A                          |
| Number of episodes                              | 1,059,474                 | 167,330                     | 167,330                    | 167,330                     | 1,057,707                    |
| Number of people                                | 728,455                   | 147,846                     | 147,846                    | 147,846                     | 727,311                      |

Note: p-value for risk ratios is for the null hypothesis that the risk ratio = 1

N/A: variable not included in model

\* p<0.05, \*\* p<0.01, \*\*\* p<0.001

| Sensitivity analysis: ACEi/ARB monotherapy                |                              |                              |                             |                              |                              |
|-----------------------------------------------------------|------------------------------|------------------------------|-----------------------------|------------------------------|------------------------------|
|                                                           | (6)                          | (7)                          | (8)                         | (9)                          | (10)                         |
|                                                           | Inpatient stay               | Inpatient stay with ICU/CCU  | Inpatient stay with ARD dx  | Inpatient stay with ARDS dx  | Died same or following month |
| <b>Key coefficient estimates</b>                          |                              |                              |                             |                              |                              |
| <b>Season</b>                                             |                              |                              |                             |                              |                              |
| 2017-2018 flu season                                      | ref.                         | ref.                         | ref.                        | ref.                         | ref.                         |
| 2018-2019 flu season                                      | -0.001<br>(-0.004,0.002)     | 0.008<br>(-0.002,0.018)      | 0.013***<br>(0.008,0.017)   | -0.007***<br>(-0.010,-0.004) | 0<br>(-0.002,0.002)          |
| 2019-2020 flu season                                      | 0.018***<br>(0.015,0.021)    | 0.035***<br>(0.026,0.044)    | 0.013***<br>(0.008,0.017)   | 0.013***<br>(0.009,0.016)    | 0.016***<br>(0.014,0.017)    |
| <b>HTN medication group</b>                               |                              |                              |                             |                              |                              |
| Other medications only                                    | ref.                         | ref.                         | ref.                        | ref.                         | ref.                         |
| ACEi or ARB plus/minus other medications                  | -0.020***<br>(-0.023,-0.017) | -0.004<br>(-0.014,0.006)     | -0.007**<br>(-0.011,-0.002) | -0.002<br>(-0.006,0.001)     | -0.010***<br>(-0.012,-0.009) |
| ACEi or ARB monotherapy                                   | -0.016***<br>(-0.020,-0.012) | -0.039***<br>(-0.057,-0.020) | -0.007<br>(-0.015,0.001)    | -0.009**<br>(-0.015,-0.003)  | -0.004***<br>(-0.006,-0.002) |
| <b>Season/medication interactions</b>                     |                              |                              |                             |                              |                              |
| 2018-2019 season: ACEi or ARB +/- other                   | 0.004*<br>(0.000,0.008)      | 0.004<br>(-0.009,0.018)      | 0.004<br>(-0.003,0.010)     | -0.001<br>(-0.005,0.004)     | -0.001<br>(-0.003,0.002)     |
| 2018-2019 season: ACEi or ARB monotherapy                 | 0.005<br>(-0.001,0.010)      | 0.040**<br>(0.015,0.065)     | 0.002<br>(-0.009,0.013)     | 0.002<br>(-0.006,0.009)      | 0.001<br>(-0.002,0.004)      |
| 2019-2020 season: ACEi or ARB +/- other                   | 0.015***<br>(0.011,0.019)    | 0.011<br>(-0.001,0.024)      | 0.007*<br>(0.002,0.013)     | 0.008***<br>(0.003,0.013)    | -0.001<br>(-0.004,0.001)     |
| 2019-2020 season: ACEi or ARB monotherapy                 | 0.017***<br>(0.012,0.022)    | 0.035**<br>(0.013,0.057)     | 0.004<br>(-0.006,0.013)     | 0.012**<br>(0.004,0.020)     | -0.003*<br>(-0.006,-0.000)   |
| Note: p-value for coefficients is for the null hypothesis |                              |                              |                             |                              |                              |
| <b>Marginal effects/predicted probability</b>             |                              |                              |                             |                              |                              |
| <b>Other hypertension medications only</b>                |                              |                              |                             |                              |                              |
| 2017/18                                                   | 0.179<br>(0.177,0.181)       | 0.481<br>(0.474,0.489)       | 0.053<br>(0.050,0.056)      | 0.030<br>(0.028,0.033)       | 0.064<br>(0.062,0.065)       |
| 2018/19                                                   | 0.178<br>(0.176,0.180)       | 0.490<br>(0.483,0.496)       | 0.066<br>(0.062,0.069)      | 0.023<br>(0.021,0.025)       | 0.064<br>(0.063,0.065)       |
| 2019/20                                                   | 0.196<br>(0.195,0.198)       | 0.516<br>(0.511,0.521)       | 0.066<br>(0.063,0.068)      | 0.043<br>(0.041,0.045)       | 0.079<br>(0.078,0.081)       |

| Sensitivity analysis: ACEi/ARB monotherapy               |                           |                             |                            |                             |                              |
|----------------------------------------------------------|---------------------------|-----------------------------|----------------------------|-----------------------------|------------------------------|
|                                                          | (6)                       | (7)                         | (8)                        | (9)                         | (10)                         |
|                                                          | Inpatient stay            | Inpatient stay with ICU/CCU | Inpatient stay with ARD dx | Inpatient stay with ARDS dx | Died same or following month |
| <b>ACEi or ARB plus/minus other medications</b>          |                           |                             |                            |                             |                              |
| 2017/18                                                  | 0.133<br>(0.132,0.135)    | 0.473<br>(0.466,0.480)      | 0.046<br>(0.043,0.049)     | 0.030<br>(0.027,0.032)      | 0.037<br>(0.036,0.038)       |
| 2018/19                                                  | 0.136<br>(0.135,0.138)    | 0.486<br>(0.479,0.492)      | 0.062<br>(0.059,0.065)     | 0.022<br>(0.020,0.024)      | 0.037<br>(0.036,0.038)       |
| 2019/20                                                  | 0.166<br>(0.164,0.167)    | 0.519<br>(0.514,0.524)      | 0.066<br>(0.063,0.068)     | 0.050<br>(0.048,0.052)      | 0.052<br>(0.051,0.053)       |
| <b>ACEi or ARB monotherapy</b>                           |                           |                             |                            |                             |                              |
| 2017/18                                                  | 0.093<br>(0.090,0.096)    | 0.408<br>(0.392,0.425)      | 0.040<br>(0.033,0.047)     | 0.024<br>(0.019,0.029)      | 0.024<br>(0.022,0.025)       |
| 2018/19                                                  | 0.096<br>(0.094,0.099)    | 0.456<br>(0.441,0.472)      | 0.054<br>(0.047,0.061)     | 0.018<br>(0.014,0.022)      | 0.025<br>(0.023,0.026)       |
| 2019/20                                                  | 0.127<br>(0.125,0.130)    | 0.478<br>(0.467,0.489)      | 0.056<br>(0.051,0.061)     | 0.048<br>(0.043,0.053)      | 0.036<br>(0.034,0.037)       |
| <b>Risk ratios of marginal effects</b>                   |                           |                             |                            |                             |                              |
| <b>Other hypertension medications only</b>               |                           |                             |                            |                             |                              |
| 2018/19 season vs. 2017/18                               | 0.994<br>(0.977,1.011)    | 1.017<br>(0.996,1.038)      | 1.236***<br>(1.136,1.337)  | 0.759***<br>(0.668,0.850)   | 0.999<br>(0.969,1.030)       |
| 2019/20 season vs. 2017/18                               | 1.098***<br>(1.081,1.116) | 1.072***<br>(1.053,1.092)   | 1.238***<br>(1.147,1.330)  | 1.414***<br>(1.278,1.550)   | 1.243***<br>(1.209,1.278)    |
| <b>ACEi or ARB plus/minus other medications</b>          |                           |                             |                            |                             |                              |
| 2018/19 season vs. 2017/18                               | 1.023*<br>(1.005,1.041)   | 1.027*<br>(1.006,1.048)     | 1.360***<br>(1.243,1.476)  | 0.735***<br>(0.647,0.824)   | 0.985<br>(0.950,1.019)       |
| 2019/20 season vs. 2017/18                               | 1.244***<br>(1.225,1.264) | 1.097***<br>(1.077,1.118)   | 1.441***<br>(1.329,1.554)  | 1.690***<br>(1.532,1.848)   | 1.382***<br>(1.339,1.425)    |
| <b>ACEi or ARB monotherapy</b>                           |                           |                             |                            |                             |                              |
| 2018/19 season vs. 2017/18                               | 1.037<br>(0.993,1.080)    | 1.117***<br>(1.058,1.177)   | 1.358*<br>(1.055,1.660)    | 0.766<br>(0.526,1.006)      | 1.047<br>(0.958,1.136)       |
| 2019/20 season vs. 2017/18                               | 1.369***<br>(1.318,1.420) | 1.170***<br>(1.115,1.226)   | 1.412**<br>(1.129,1.694)   | 2.028***<br>(1.537,2.519)   | 1.526***<br>(1.412,1.640)    |
| Number of episodes                                       | 1,059,474                 | 167,330                     | 167,330                    | 167,330                     | 1,057,707                    |
| Number of people                                         | 728,455                   | 147,846                     | 147,846                    | 147,846                     | 727,311                      |
| Note: p-value for risk ratios is for the null hypothesis |                           |                             |                            |                             |                              |
| N/A: variable not included in model                      |                           |                             |                            |                             |                              |
| * p<0.05, ** p<0.01, *** p<0.001                         |                           |                             |                            |                             |                              |

**Sensitivity analysis: Dropping people with comorbidities (other than hypertension)**

|                                                           | (11)                         | (12)                        | (13)                       | (14)                        | (15)                         |
|-----------------------------------------------------------|------------------------------|-----------------------------|----------------------------|-----------------------------|------------------------------|
|                                                           | Inpatient stay               | Inpatient stay with ICU/CCU | Inpatient stay with ARD dx | Inpatient stay with ARDS dx | Died same or following month |
| <b>Key coefficient estimates</b>                          |                              |                             |                            |                             |                              |
| <b>Season</b>                                             |                              |                             |                            |                             |                              |
| 2017-2018 flu season                                      | ref.                         | ref.                        | ref.                       | ref.                        | ref.                         |
| 2018-2019 flu season                                      | 0.002<br>(-0.001,0.006)      | 0.02<br>(-0.032,0.072)      | 0.030**<br>(0.009,0.051)   | 0.006<br>(-0.005,0.017)     | 0<br>(-0.002,0.002)          |
| 2019-2020 flu season                                      | 0.032***<br>(0.028,0.035)    | 0.068**<br>(0.024,0.111)    | 0.029***<br>(0.014,0.045)  | 0.052***<br>(0.039,0.065)   | 0.007***<br>(0.005,0.009)    |
| <b>HTN medication group</b>                               |                              |                             |                            |                             |                              |
| Other medications only                                    | ref.                         | ref.                        | ref.                       | ref.                        | ref.                         |
| ACEi or ARB plus/minus other medications                  | -0.006***<br>(-0.009,-0.003) | -0.001<br>(-0.049,0.046)    | 0.009<br>(-0.008,0.026)    | 0.003<br>(-0.007,0.013)     | -0.003***<br>(-0.004,-0.001) |
| ACEi or ARB monotherapy                                   | N/A                          | N/A                         | N/A                        | N/A                         | N/A                          |
| <b>Season/medication interactions</b>                     |                              |                             |                            |                             |                              |
| 2018-2019 season: ACEi or ARB +- other                    | -0.003<br>(-0.007,0.001)     | 0.004<br>(-0.062,0.071)     | -0.013<br>(-0.041,0.014)   | 0.001<br>(-0.015,0.017)     | 0.001<br>(-0.001,0.003)      |
| 2018-2019 season: ACEi or ARB monotherapy                 | N/A                          | N/A                         | N/A                        | N/A                         | N/A                          |
| 2019-2020 season: ACEi or ARB +/- other                   | -0.001<br>(-0.006,0.003)     | 0.05<br>(-0.006,0.106)      | -0.022*<br>(-0.043,-0.001) | -0.001<br>(-0.019,0.016)    | -0.001<br>(-0.003,0.001)     |
| 2019-2020 season: ACEi or ARB monotherapy                 | N/A                          | N/A                         | N/A                        | N/A                         | N/A                          |
| Note: p-value for coefficients is for the null hypothesis |                              |                             |                            |                             |                              |
| <b>Marginal effects/predicted probability</b>             |                              |                             |                            |                             |                              |
| <b>Other hypertension medications only</b>                |                              |                             |                            |                             |                              |
| 2017/18                                                   | 0.031<br>(0.029,0.034)       | 0.312<br>(0.275,0.350)      | 0.023<br>(0.011,0.035)     | 0.009<br>(0.002,0.016)      | 0.007<br>(0.006,0.009)       |
| 2018/19                                                   | 0.033<br>(0.031,0.036)       | 0.332<br>(0.296,0.368)      | 0.053<br>(0.036,0.070)     | 0.015<br>(0.006,0.024)      | 0.007<br>(0.006,0.008)       |
| 2019/20                                                   | 0.063<br>(0.060,0.066)       | 0.380<br>(0.357,0.403)      | 0.053<br>(0.042,0.063)     | 0.061<br>(0.050,0.073)      | 0.014<br>(0.013,0.016)       |

**Sensitivity analysis: Dropping people with comorbidities (other than hypertension)**

|                                                 | (11)                      | (12)                        | (13)                       | (14)                        | (15)                         |
|-------------------------------------------------|---------------------------|-----------------------------|----------------------------|-----------------------------|------------------------------|
|                                                 | Inpatient stay            | Inpatient stay with ICU/CCU | Inpatient stay with ARD dx | Inpatient stay with ARDS dx | Died same or following month |
| <b>ACEi or ARB plus/minus other medications</b> |                           |                             |                            |                             |                              |
| 2017/18                                         | 0.023<br>(0.022,0.025)    | 0.319<br>(0.289,0.349)      | 0.033<br>(0.021,0.044)     | 0.016<br>(0.008,0.023)      | 0.004<br>(0.003,0.004)       |
| 2018/19                                         | 0.022<br>(0.021,0.024)    | 0.343<br>(0.313,0.373)      | 0.049<br>(0.036,0.063)     | 0.023<br>(0.014,0.032)      | 0.004<br>(0.004,0.005)       |
| 2019/20                                         | 0.054<br>(0.052,0.055)    | 0.436<br>(0.418,0.454)      | 0.040<br>(0.033,0.048)     | 0.067<br>(0.058,0.076)      | 0.010<br>(0.009,0.011)       |
| <b>ACEi or ARB monotherapy</b>                  |                           |                             |                            |                             |                              |
| 2017/18                                         | N/A                       | N/A                         | N/A                        | N/A                         | N/A                          |
| 2018/19                                         | N/A                       | N/A                         | N/A                        | N/A                         | N/A                          |
| 2019/20                                         | N/A                       | N/A                         | N/A                        | N/A                         | N/A                          |
| <b>Risk ratios of marginal effects</b>          |                           |                             |                            |                             |                              |
| <b>Other hypertension medications only</b>      |                           |                             |                            |                             |                              |
| 2018/19 season vs. 2017/18                      | 1.069<br>(0.953,1.186)    | 1.064<br>(0.893,1.235)      | 2.291<br>(0.893,3.688)     | 1.633<br>(0.078,3.189)      | 0.973<br>(0.744,1.203)       |
| 2019/20 season vs. 2017/18                      | 2.008***<br>(1.823,2.193) | 1.216**<br>(1.053,1.379)    | 2.270*<br>(1.013,3.526)    | 6.718*<br>(1.473,11.963)    | 1.942***<br>(1.561,2.323)    |
| <b>ACEi or ARB plus/minus other medications</b> |                           |                             |                            |                             |                              |
| 2018/19 season vs. 2017/18                      | 0.961<br>(0.875,1.047)    | 1.076<br>(0.939,1.213)      | 1.510<br>(0.842,2.177)     | 1.432<br>(0.544,2.320)      | 1.128<br>(0.879,1.377)       |
| 2019/20 season vs. 2017/18                      | 2.291***<br>(2.124,2.458) | 1.369***<br>(1.228,1.509)   | 1.234<br>(0.754,1.713)     | 4.210**<br>(2.113,6.308)    | 2.624***<br>(2.142,3.107)    |
| <b>ACEi or ARB monotherapy</b>                  |                           |                             |                            |                             |                              |
| 2018/19 season vs. 2017/18                      | N/A                       | N/A                         | N/A                        | N/A                         | N/A                          |
| 2019/20 season vs. 2017/18                      | N/A                       | N/A                         | N/A                        | N/A                         | N/A                          |
| Number of episodes                              | 200,778                   | 7,696                       | 7,696                      | 7,696                       | 200,508                      |
| Number of people                                | 175,494                   | 7,647                       | 7,647                      | 7,647                       | 175,251                      |

Note: p-value for risk ratios is for the null hypothe

N/A: variable not included in model

\* p&lt;0.05, \*\* p&lt;0.01, \*\*\* p&lt;0.001

**Sensitivity analysis: limiting analysis to strict flu season (dropping summer months)**

|                                                           | (16)                         | (17)                        | (18)                        | (19)                         | (20)                         |
|-----------------------------------------------------------|------------------------------|-----------------------------|-----------------------------|------------------------------|------------------------------|
|                                                           | Inpatient stay               | Inpatient stay with ICU/CCU | Inpatient stay with ARD dx  | Inpatient stay with ARDS dx  | Died same or following month |
| <b>Key coefficient estimates</b>                          |                              |                             |                             |                              |                              |
| <b>Season</b>                                             |                              |                             |                             |                              |                              |
| 2017-2018 flu season                                      | ref.                         | ref.                        | ref.                        | ref.                         | ref.                         |
| 2018-2019 flu season                                      | 0<br>(-0.004,0.003)          | 0.009<br>(-0.002,0.019)     | 0.017***<br>(0.012,0.022)   | -0.007***<br>(-0.010,-0.003) | 0<br>(-0.002,0.002)          |
| 2019-2020 flu season                                      | 0.003*<br>(0.000,0.007)      | 0.030***<br>(0.020,0.041)   | 0.017***<br>(0.011,0.022)   | 0.010***<br>(0.006,0.014)    | 0.017***<br>(0.015,0.020)    |
| <b>HTN medication group</b>                               |                              |                             |                             |                              |                              |
| Other medications only                                    | ref.                         | ref.                        | ref.                        | ref.                         | ref.                         |
| ACEi or ARB plus/minus other medications                  | -0.016***<br>(-0.019,-0.013) | -0.01<br>(-0.021,0.000)     | -0.007**<br>(-0.011,-0.002) | -0.003<br>(-0.006,0.001)     | -0.009***<br>(-0.010,-0.007) |
| ACEi or ARB monotherapy                                   | N/A                          | N/A                         | N/A                         | N/A                          | N/A                          |
| <b>Season/medication interactions</b>                     |                              |                             |                             |                              |                              |
| 2018-2019 season: ACEi or ARB + other                     | 0.002<br>(-0.002,0.006)      | 0.01<br>(-0.004,0.025)      | 0.001<br>(-0.006,0.008)     | 0<br>(-0.005,0.004)          | 0<br>(-0.003,0.002)          |
| 2018-2019 season: ACEi or ARB monotherapy                 | N/A                          | N/A                         | N/A                         | N/A                          | N/A                          |
| 2019-2020 season: ACEi or ARB +/- other                   | 0.008***<br>(0.004,0.012)    | 0.012<br>(-0.003,0.026)     | 0.008*<br>(0.001,0.014)     | 0.008**<br>(0.002,0.013)     | -0.005***<br>(-0.008,-0.002) |
| 2019-2020 season: ACEi or ARB monotherapy                 | N/A                          | N/A                         | N/A                         | N/A                          | N/A                          |
| Note: p-value for coefficients is for the null hypothesis |                              |                             |                             |                              |                              |
| <b>Marginal effects/predicted probability</b>             |                              |                             |                             |                              |                              |
| <b>Other hypertension medications only</b>                |                              |                             |                             |                              |                              |
| 2017/18                                                   | 0.175<br>(0.173,0.178)       | 0.480<br>(0.472,0.487)      | 0.053<br>(0.049,0.056)      | 0.030<br>(0.028,0.033)       | 0.061<br>(0.060,0.063)       |
| 2018/19                                                   | 0.175<br>(0.172,0.177)       | 0.488<br>(0.480,0.496)      | 0.070<br>(0.066,0.074)      | 0.024<br>(0.021,0.026)       | 0.061<br>(0.060,0.063)       |
| 2019/20                                                   | 0.179<br>(0.176,0.181)       | 0.510<br>(0.503,0.517)      | 0.069<br>(0.066,0.073)      | 0.041<br>(0.038,0.044)       | 0.079<br>(0.077,0.080)       |

**Sensitivity analysis: limiting analysis to strict flu season (dropping summer months)**

|                                                 | (16)                      | (17)                        | (18)                       | (19)                        | (20)                         |
|-------------------------------------------------|---------------------------|-----------------------------|----------------------------|-----------------------------|------------------------------|
|                                                 | Inpatient stay            | Inpatient stay with ICU/CCU | Inpatient stay with ARD dx | Inpatient stay with ARDS dx | Died same or following month |
| <b>ACEi or ARB plus/minus other medications</b> |                           |                             |                            |                             |                              |
| 2017/18                                         | 0.122<br>(0.120,0.123)    | 0.459<br>(0.452,0.466)      | 0.044<br>(0.041,0.047)     | 0.028<br>(0.026,0.031)      | 0.033<br>(0.032,0.033)       |
| 2018/19                                         | 0.124<br>(0.122,0.125)    | 0.478<br>(0.470,0.485)      | 0.063<br>(0.059,0.066)     | 0.021<br>(0.019,0.023)      | 0.032<br>(0.032,0.033)       |
| 2019/20                                         | 0.133<br>(0.131,0.134)    | 0.501<br>(0.494,0.508)      | 0.069<br>(0.065,0.072)     | 0.046<br>(0.044,0.049)      | 0.045<br>(0.044,0.046)       |
| <b>ACEi or ARB monotherapy</b>                  |                           |                             |                            |                             |                              |
| 2017/18                                         | N/A                       | N/A                         | N/A                        | N/A                         | N/A                          |
| 2018/19                                         | N/A                       | N/A                         | N/A                        | N/A                         | N/A                          |
| 2019/20                                         | N/A                       | N/A                         | N/A                        | N/A                         | N/A                          |
| <b>Risk ratios of marginal effects</b>          |                           |                             |                            |                             |                              |
| <b>Other hypertension medications only</b>      |                           |                             |                            |                             |                              |
| 2018/19 season vs. 2017/18                      | 0.998<br>(0.979,1.017)    | 1.018<br>(0.995,1.041)      | 1.324***<br>(1.208,1.440)  | 0.776***<br>(0.673,0.879)   | 1.002<br>(0.967,1.036)       |
| 2019/20 season vs. 2017/18                      | 1.019<br>(1.000,1.039)    | 1.064***<br>(1.041,1.087)   | 1.313***<br>(1.201,1.425)  | 1.343***<br>(1.190,1.495)   | 1.282***<br>(1.241,1.324)    |
| <b>ACEi or ARB plus/minus other medications</b> |                           |                             |                            |                             |                              |
| 2018/19 season vs. 2017/18                      | 1.017<br>(0.999,1.035)    | 1.041***<br>(1.019,1.063)   | 1.411***<br>(1.289,1.533)  | 0.750***<br>(0.655,0.846)   | 0.997<br>(0.960,1.034)       |
| 2019/20 season vs. 2017/18                      | 1.091***<br>(1.071,1.110) | 1.092***<br>(1.069,1.114)   | 1.542***<br>(1.413,1.671)  | 1.634***<br>(1.465,1.803)   | 1.380***<br>(1.331,1.428)    |
| <b>ACEi or ARB monotherapy</b>                  |                           |                             |                            |                             |                              |
| 2018/19 season vs. 2017/18                      | N/A                       | N/A                         | N/A                        | N/A                         | N/A                          |
| 2019/20 season vs. 2017/18                      | N/A                       | N/A                         | N/A                        | N/A                         | N/A                          |
| Number of episodes                              | 738,240                   | 106,917                     | 106,917                    | 106,917                     | 737,059                      |
| Number of people                                | 556,579                   | 97,383                      | 97,383                     | 97,383                      | 555,729                      |

Note: p-value for risk ratios is for the null hypothe

N/A: variable not included in model

\* p&lt;0.05, \*\* p&lt;0.01, \*\*\* p&lt;0.001
